# Supplementary material for: New Cardenolides from Biotransformation of Gitoxigenin by the Endophytic Fungus Alternaria eureka 1E1BL1: Characterization and Cytotoxic Activities
Source: MDPI journal article supplement (doi:10.3390/molecules26103030), 2021-05-19
Supplement: s1 [file s1]

# **New Cardenolides from Biotransformation of Gitoxigenin by the Endophytic Fungus *Alternaria eureka* 1E1BL1: Characterization and Cytotoxic Activities**

**Erdal Bedir <sup>1,\*</sup>, Çiğdem Karakoyun <sup>2,\*</sup>, Gamze Doğan <sup>1</sup>, Gülten Kuru <sup>1</sup>, Melis Küçüksolak <sup>1</sup>, Hasan Yusufoglu <sup>3</sup>**

<sup>1</sup> Department of Bioengineering, Faculty of Engineering, İzmir Institute of Technology, 35430 Urla-İzmir, Turkey

<sup>2</sup> Department of Pharmacognosy, Faculty of Pharmacy, Ege University, 35100 Bornova-İzmir, Turkey

<sup>3</sup> Department of Pharmacognosy, College of Pharmacy, Prince Sattam Bin Abdulaziz University, 11942 Al-Kharj, Saudi Arabia

\* Correspondence: erdalbedir@iyte.edu.tr and cigdem.karakoyun@ege.edu.tr

## Index/List of figures, tables and chromatograms:

|                                                                                                                        |    |
|------------------------------------------------------------------------------------------------------------------------|----|
| <b>Figure S1.</b> Negative-ion mode HR-ESI-MS spectrum of substrate gitoxigenin.....                                   | 5  |
| <b>Figure S2.</b> Positive-ion mode HR-ESI-MS spectrum of substrate gitoxigenin .....                                  | 6  |
| <b>Figure S3.</b> FT-IR Spectrum of substrate gitoxigenin.....                                                         | 7  |
| <b>Figure S4.</b> <sup>1</sup> H NMR Spectrum of substrate gitoxigenin .....                                           | 8  |
| <b>Figure S5.</b> <sup>13</sup> C NMR Spectrum of substrate gitoxigenin .....                                          | 9  |
| <b>Figure S6.</b> COSY Spectrum of substrate gitoxigenin.....                                                          | 10 |
| <b>Figure S7.</b> HSQC Spectrum of substrate gitoxigenin.....                                                          | 11 |
| <b>Figure S8.</b> HMBC Spectrum of substrate gitoxigenin.....                                                          | 12 |
| <b>Figure S9.</b> NOESY Spectrum of substrate gitoxigenin .....                                                        | 13 |
| <b>Figure S10.</b> Negative-ion mode HR-ESI-MS spectrum of 7(β)-hydroxy-3-oxo-gitoxigenin (compound 1) .....           | 14 |
| <b>Figure S11.</b> Positive-ion mode HR-ESI-MS spectrum of 7(β)-hydroxy-3-oxo-gitoxigenin (compound 1).....            | 15 |
| <b>Figure S12.</b> FT-IR Spectrum of 7(β)-hydroxy-3-oxo-gitoxigenin (compound 1).....                                  | 16 |
| <b>Figure S13.</b> <sup>1</sup> H NMR Spectrum of 7(β)-hydroxy-3-oxo-gitoxigenin (compound 1).....                     | 17 |
| <b>Figure S14.</b> <sup>13</sup> C NMR Spectrum of 7(β)-hydroxy-3-oxo-gitoxigenin (compound 1).....                    | 18 |
| <b>Figure S15.</b> COSY Spectrum of 7(β)-hydroxy-3-oxo-gitoxigenin (compound 1) .....                                  | 19 |
| <b>Figure S16.</b> HSQC Spectrum of 7(β)-hydroxy-3-oxo-gitoxigenin (compound 1) .....                                  | 20 |
| <b>Figure S17.</b> HMBC Spectrum of 7(β)-hydroxy-3-oxo-gitoxigenin (compound 1) .....                                  | 21 |
| <b>Figure S18.</b> NOESY Spectrum of 7(β)-hydroxy-3-oxo-gitoxigenin (compound 1).....                                  | 22 |
| <b>Figure S19.</b> Negative-ion mode HR-ESI-MS spectrum of 3-oxo-gitoxigenin (compound 2).....                         | 23 |
| <b>Figure S20.</b> Positive-ion mode HR-ESI-MS spectrum of 3-oxo-gitoxigenin (compound 2) .....                        | 24 |
| <b>Figure S21.</b> FT-IR Spectrum of 3-oxo-gitoxigenin (compound 2) .....                                              | 25 |
| <b>Figure S22.</b> <sup>1</sup> H NMR Spectrum of 3-oxo-gitoxigenin (compound 2) .....                                 | 26 |
| <b>Figure S23.</b> <sup>13</sup> C NMR Spectrum of 3-oxo-gitoxigenin (compound 2) .....                                | 27 |
| <b>Figure S24.</b> COSY Spectrum of 3-oxo-gitoxigenin (compound 2).....                                                | 28 |
| <b>Figure S25.</b> HSQC Spectrum of 3-oxo-gitoxigenin (compound 2).....                                                | 29 |
| <b>Figure S26.</b> HMBC Spectrum of 3-oxo-gitoxigenin (compound 2).....                                                | 30 |
| <b>Figure S27.</b> NOESY Spectrum of 3-oxo-gitoxigenin (compound 2) .....                                              | 31 |
| <b>Figure S28.</b> Negative-ion mode HR-ESI-MS spectrum of 7(β),12(β)-dihydroxy-3-oxo-gitoxigenin (compound 3) .....   | 32 |
| <b>Figure S29.</b> Positive-ion mode HR-ESI-MS spectrum of 7(β),12(β)-dihydroxy-3-oxo-gitoxigenin (compound 3) .....   | 33 |
| <b>Figure S30.</b> FT-IR Spectrum of 7(β),12(β)-dihydroxy-3-oxo-gitoxigenin (compound 3) .....                         | 34 |
| <b>Figure S31.</b> <sup>1</sup> H NMR Spectrum of 7(β),12(β)-dihydroxy-3-oxo-gitoxigenin (compound 3).....             | 35 |
| <b>Figure S32.</b> <sup>13</sup> C NMR Spectrum of 7(β),12(β)-dihydroxy-3-oxo-gitoxigenin (compound 3).....            | 36 |
| <b>Figure S33.</b> COSY Spectrum of 7(β),12(β)-dihydroxy-3-oxo-gitoxigenin (compound 3) .....                          | 37 |
| <b>Figure S34.</b> HSQC Spectrum of 7(β),12(β)-dihydroxy-3-oxo-gitoxigenin (compound 3) .....                          | 38 |
| <b>Figure S35.</b> HMBC Spectrum of 7(β),12(β)-dihydroxy-3-oxo-gitoxigenin (compound 3) .....                          | 39 |
| <b>Figure S36.</b> NOESY Spectrum of 7(β),12(β)-dihydroxy-3-oxo-gitoxigenin (compound 3).....                          | 40 |
| <b>Figure S37.</b> Negative-ion mode HR-ESI-MS spectrum of 3-dimethylacetal-7(β)-hydroxygitoxigenin (compound 4) ..... | 41 |
| <b>Figure S38.</b> Positive-ion mode HR-ESI-MS spectrum of 3-dimethylacetal-7(β)-hydroxygitoxigenin (compound 4) ..... | 42 |
| <b>Figure S39.</b> FT-IR spectrum of 3-dimethylacetal-7(β)-hydroxygitoxigenin (compound 4) .....                       | 43 |
| <b>Figure S40.</b> <sup>1</sup> H NMR Spectrum of 3-dimethylacetal-7(β)-hydroxygitoxigenin (compound 4) .....          | 44 |
| <b>Figure S41.</b> <sup>13</sup> C NMR Spectrum of 3-dimethylacetal-7(β)-hydroxygitoxigenin (compound 4) .....         | 45 |
| <b>Figure S42.</b> COSY Spectrum of 3-dimethylacetal-7(β)-hydroxygitoxigenin (compound 4).....                         | 46 |
| <b>Figure S43.</b> HSQC Spectrum of 3-dimethylacetal-7(β)-hydroxygitoxigenin (compound 4).....                         | 47 |

|                                                                                                                              |    |
|------------------------------------------------------------------------------------------------------------------------------|----|
| <b>Figure S44.</b> HMBC Spectrum of 3-dimethylacetal-7( $\beta$ )-hydroxygitoxigenin ( <b>compound 4</b> ).....              | 48 |
| <b>Figure S45.</b> NOESY Spectrum of 3-dimethylacetal-7( $\beta$ )-hydroxygitoxigenin ( <b>compound 4</b> ) .....            | 49 |
| <b>Figure S46.</b> Negative-ion mode HR-ESI-MS spectrum of 3-epi-gitoxigenin ( <b>compound 5</b> ).....                      | 50 |
| <b>Figure S47.</b> Positive-ion mode HR-ESI-MS spectrum of 3-epi-gitoxigenin ( <b>compound 5</b> ) .....                     | 51 |
| <b>Figure S48.</b> FT-IR Spectrum of 3-epi-gitoxigenin ( <b>compound 5</b> ).....                                            | 52 |
| <b>Figure S49.</b> $^1\text{H}$ NMR Spectrum of 3-epi-gitoxigenin ( <b>compound 5</b> ) .....                                | 53 |
| <b>Figure S50.</b> $^{13}\text{C}$ NMR Spectrum of 3-epi-gitoxigenin ( <b>compound 5</b> ) .....                             | 54 |
| <b>Figure S51.</b> COSY Spectrum of 3-epi-gitoxigenin ( <b>compound 5</b> ).....                                             | 55 |
| <b>Figure S52.</b> HSQC Spectrum of 3-epi-gitoxigenin ( <b>compound 5</b> ).....                                             | 56 |
| <b>Figure S53.</b> HMBC Spectrum of 3-epi-gitoxigenin ( <b>compound 5</b> ).....                                             | 57 |
| <b>Figure S54.</b> NOESY Spectrum of 3-epi-gitoxigenin ( <b>compound 5</b> ) .....                                           | 58 |
| <b>Figure S55.</b> Negative-ion mode HR-ESI-MS spectrum of 7( $\beta$ )-hydroxy-3-epi-gitoxigenin ( <b>compound 6</b> )..... | 59 |
| <b>Figure S56.</b> Positive-ion mode HR-ESI-MS spectrum of 7( $\beta$ )-hydroxy-3-epi-gitoxigenin ( <b>compound 6</b> )..... | 60 |
| <b>Figure S57.</b> FT-IR Spectrum of 7( $\beta$ )-hydroxy-3-epi-gitoxigenin ( <b>compound 6</b> ).....                       | 61 |
| <b>Figure S58.</b> $^1\text{H}$ NMR Spectrum of 7( $\beta$ )-hydroxy-3-epi-gitoxigenin ( <b>compound 6</b> ).....            | 62 |
| <b>Figure S59.</b> $^{13}\text{C}$ NMR Spectrum of 7( $\beta$ )-hydroxy-3-epi-gitoxigenin ( <b>compound 6</b> ).....         | 63 |
| <b>Figure S60.</b> COSY Spectrum of 7( $\beta$ )-hydroxy-3-epi-gitoxigenin ( <b>compound 6</b> ) .....                       | 64 |
| <b>Figure S61.</b> HSQC Spectrum of 7( $\beta$ )-hydroxy-3-epi-gitoxigenin ( <b>compound 6</b> ) .....                       | 65 |
| <b>Figure S62.</b> HMBC Spectrum of 7( $\beta$ )-hydroxy-3-epi-gitoxigenin ( <b>compound 6</b> ) .....                       | 66 |
| <b>Figure S63.</b> NOESY Spectrum of 7( $\beta$ )-hydroxy-3-epi-gitoxigenin ( <b>compound 6</b> ).....                       | 67 |
| <b>Figure S64.</b> Negative-ion mode HR-ESI-MS spectrum of 3-oxo-diginatigenin ( <b>compound 7</b> ).....                    | 68 |
| <b>Figure S65.</b> Positive-ion mode HR-ESI-MS spectrum of 3-oxo-diginatigenin ( <b>compound 7</b> ) .....                   | 69 |
| <b>Figure S66.</b> FT-IR Spectrum of 3-oxo-diginatigenin ( <b>compound 7</b> ).....                                          | 70 |
| <b>Figure S67.</b> $^1\text{H}$ NMR Spectrum of 3-oxo-diginatigenin ( <b>compound 7</b> ) .....                              | 71 |
| <b>Figure S68.</b> $^{13}\text{C}$ NMR Spectrum of 3-oxo-diginatigenin ( <b>compound 7</b> ) .....                           | 72 |
| <b>Figure S69.</b> COSY Spectrum of 3-oxo-diginatigenin ( <b>compound 7</b> ).....                                           | 73 |
| <b>Figure S70.</b> HSQC Spectrum of 3-oxo-diginatigenin ( <b>compound 7</b> ).....                                           | 74 |
| <b>Figure S71.</b> HMBC Spectrum of 3-oxo-diginatigenin ( <b>compound 7</b> ).....                                           | 75 |
| <b>Figure S72.</b> NOESY Spectrum of 3-oxo-diginatigenin ( <b>compound 7</b> ) .....                                         | 76 |
| <b>Figure S73.</b> Negative-ion mode HR-ESI-MS spectrum of 3-epi-diginatigenin ( <b>compound 8</b> ).....                    | 77 |
| <b>Figure S74.</b> Positive-ion mode HR-ESI-MS spectrum of 3-epi-diginatigenin ( <b>compound 8</b> ) .....                   | 78 |
| <b>Figure S75.</b> FT-IR Spectrum of 3-epi-diginatigenin ( <b>compound 8</b> ).....                                          | 79 |
| <b>Figure S76.</b> $^1\text{H}$ NMR Spectrum of 3-epi-diginatigenin ( <b>compound 8</b> ) .....                              | 80 |
| <b>Figure S77.</b> $^{13}\text{C}$ NMR Spectrum of 3-epi-diginatigenin ( <b>compound 8</b> ) .....                           | 81 |
| <b>Figure S78.</b> COSY Spectrum of 3-epi-diginatigenin ( <b>compound 8</b> ) .....                                          | 82 |
| <b>Figure S79.</b> HSQC Spectrum of 3-epi-diginatigenin ( <b>compound 8</b> ) .....                                          | 83 |
| <b>Figure S80.</b> HMBC Spectrum of 3-epi-diginatigenin ( <b>compound 8</b> ).....                                           | 84 |
| <b>Figure S81.</b> NOESY Spectrum of 3-epi-diginatigenin ( <b>compound 8</b> ) .....                                         | 85 |

|                                                                                                                                                                      |    |
|----------------------------------------------------------------------------------------------------------------------------------------------------------------------|----|
| <b>Table S1:</b> HPLC Method for qualitative analysis of selected metabolites ( <b>4</b> , <b>5</b> and <b>6</b> ) and EtOAc extract of biotransformation broth..... | 86 |
|----------------------------------------------------------------------------------------------------------------------------------------------------------------------|----|

|                                                                                                                                                                                                                                                                                                                                                                                                                    |    |
|--------------------------------------------------------------------------------------------------------------------------------------------------------------------------------------------------------------------------------------------------------------------------------------------------------------------------------------------------------------------------------------------------------------------|----|
| <b>Chromatogram S1:</b> HPLC chromatograms of <b>a</b> ) EtOAc extract, <b>b</b> ) <b>Compound 4</b> (retention time: 10.8 min), <b>c</b> ) <b>Compound 5</b> (retention time: 9.6 min), <b>d</b> ) <b>Compound 6</b> (retention time: 8.9 min) and <b>e</b> ) comparison of the EtOAc extract (blue line) with <b>Compound 4</b> (red line), <b>Compound 5</b> (green line), <b>Compound 6</b> (pink line). ..... | 87 |
| <b>Chromatogram S2:</b> LC-Q-ToF total ion chromatograms of the EtOAc extracts showing different biotransformation time points (Day 6, 10, 14, 18 and 21) (in negative mode). .....                                                                                                                                                                                                                                | 88 |

|                                                                                                                                                                                                                                                                                                                                                                                                                                                                                                            |     |
|------------------------------------------------------------------------------------------------------------------------------------------------------------------------------------------------------------------------------------------------------------------------------------------------------------------------------------------------------------------------------------------------------------------------------------------------------------------------------------------------------------|-----|
| <b>Chromatogram S3 :</b> LC-Q-ToF extracted ion chromatograms of the selected compounds (Gitoxigenin, <b>1</b> , <b>2</b> , <b>4</b> and <b>5</b> ) (in negative mode); <b>a)</b> Gitoxigenin (retention time: 10.85 min), <b>b)</b> <b>Compound 1</b> (retention time: 11.19 min), <b>c)</b> <b>Compound 2</b> (retention time: 12.02 min), <b>d)</b> <b>Compound 4</b> (retention time: 13.21 min), <b>e)</b> <b>Compound 5</b> (retention time: 11.65 min) and <b>f)</b> overlapped chromatograms ..... | 89  |
| <b>Chromatogram S4:</b> LC-Q-ToF total and extracted ion chromatograms of gitoxigenin together with its mass spectrum (in negative mode). .....                                                                                                                                                                                                                                                                                                                                                            | 90  |
| <b>Chromatogram S5:</b> LC-Q-ToF extracted ion chromatograms of gitoxigenin for different biotransformation time points (Day 6, 10, 14, 18 and 21), displaying that gitoxigenin was consumed before Day 14 (in negative mode). .....                                                                                                                                                                                                                                                                       | 91  |
| <b>Chromatogram S6:</b> LC-Q-ToF total and extracted ion chromatograms of <b>1</b> together with its mass spectrum (in negative mode). .....                                                                                                                                                                                                                                                                                                                                                               | 92  |
| <b>Chromatogram S7:</b> LC-Q-ToF extracted ion chromatograms of <b>1</b> for different biotransformation time points (Day 6, 10, 14, 18 and 21), displaying that compound <b>1</b> was present and accumulated from Day 6 to Day 21 (in negative mode). .....                                                                                                                                                                                                                                              | 93  |
| <b>Chromatogram S8:</b> LC-Q-ToF total and extracted ion chromatograms of <b>2</b> together with its mass spectrum (in negative mode). .....                                                                                                                                                                                                                                                                                                                                                               | 94  |
| <b>Chromatogram S9:</b> LC-Q-ToF extracted ion chromatograms of <b>2</b> for different biotransformation time points (Day 6, 10, 14, 18 and 21), displaying that compound <b>2</b> was present and accumulated from Day 6 to Day 21 (in negative mode). .....                                                                                                                                                                                                                                              | 95  |
| <b>Chromatogram S10:</b> LC-Q-ToF total and extracted ion chromatograms of <b>4</b> together with its mass spectrum (in negative mode). .....                                                                                                                                                                                                                                                                                                                                                              | 96  |
| <b>Chromatogram S11:</b> LC-Q-ToF extracted ion chromatograms of <b>4</b> for different biotransformation time points (Day 6, 10, 14, 18 and 21), displaying that compound <b>4</b> was produced and accumulated in last three biotransformation time points (Day 14, 18 and 21) (in negative mode). .....                                                                                                                                                                                                 | 97  |
| <b>Chromatogram S12:</b> LC-Q-ToF total and extracted ion chromatograms of <b>5</b> together with its mass spectrum (in negative mode). .....                                                                                                                                                                                                                                                                                                                                                              | 98  |
| <b>Chromatogram S13:</b> LC-Q-ToF extracted ion chromatograms of <b>5</b> for different biotransformation time points (Day 6, 10, 14, 18 and 21), displaying that compound <b>5</b> was produced in the last three biotransformation time points (Day 14, 18 and 21) (in negative mode). .....                                                                                                                                                                                                             | 99  |
| <b>Scheme S1:</b> Isolation pattern for biotransformation products of gitoxigenin.....                                                                                                                                                                                                                                                                                                                                                                                                                     | 100 |
| <b>Scheme S2:</b> Isolation pattern for biotransformation products of gitoxigenin.....                                                                                                                                                                                                                                                                                                                                                                                                                     | 101 |
| <b>Table S 2:</b> LC-MS method for qualitative analysis of the selected metabolites ( <b>1</b> , <b>2</b> , <b>4</b> , <b>5</b> ), gitoxigenin, and the EtOAc extracts of biotransformation broth. ....                                                                                                                                                                                                                                                                                                    | 102 |



Erdal Sample GITO negative - 13-12-2020 #39 RT: 0.18 AV: 1 NL: 7.53E6  
T: FTMS - p ESI Full ms [160.0000-1500.0000]

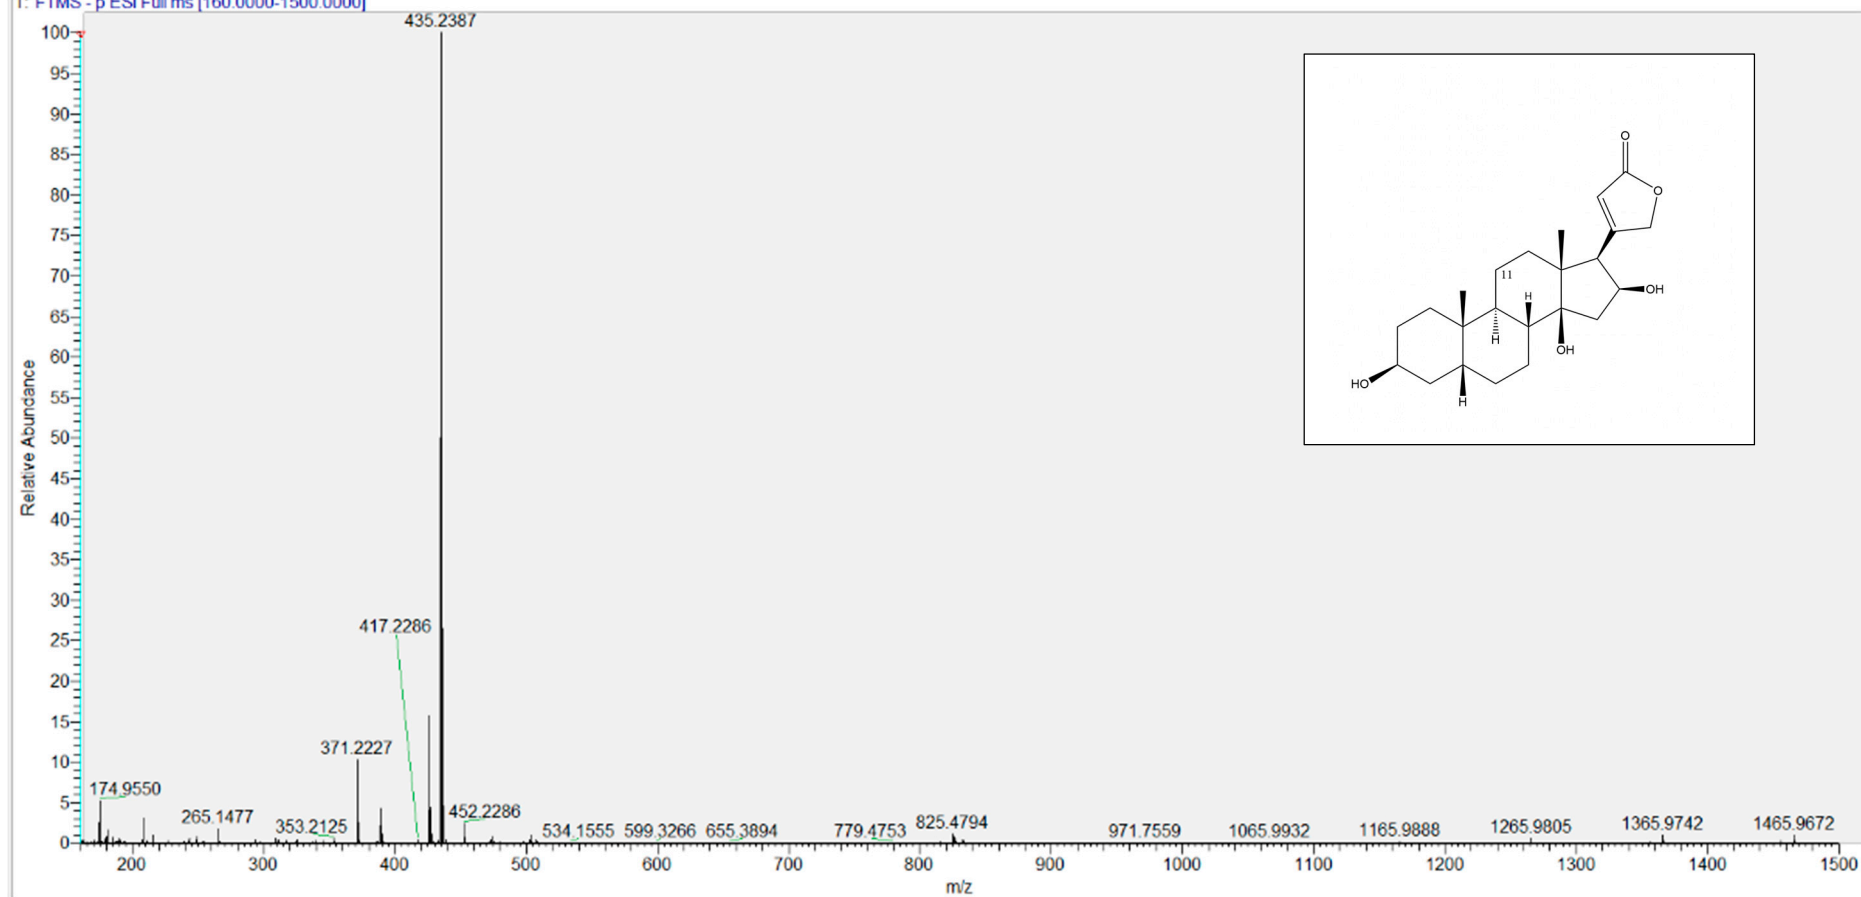

**Figure S1.** Negative-ion mode HR-ESI-MS spectrum of substrate gitoxigenin

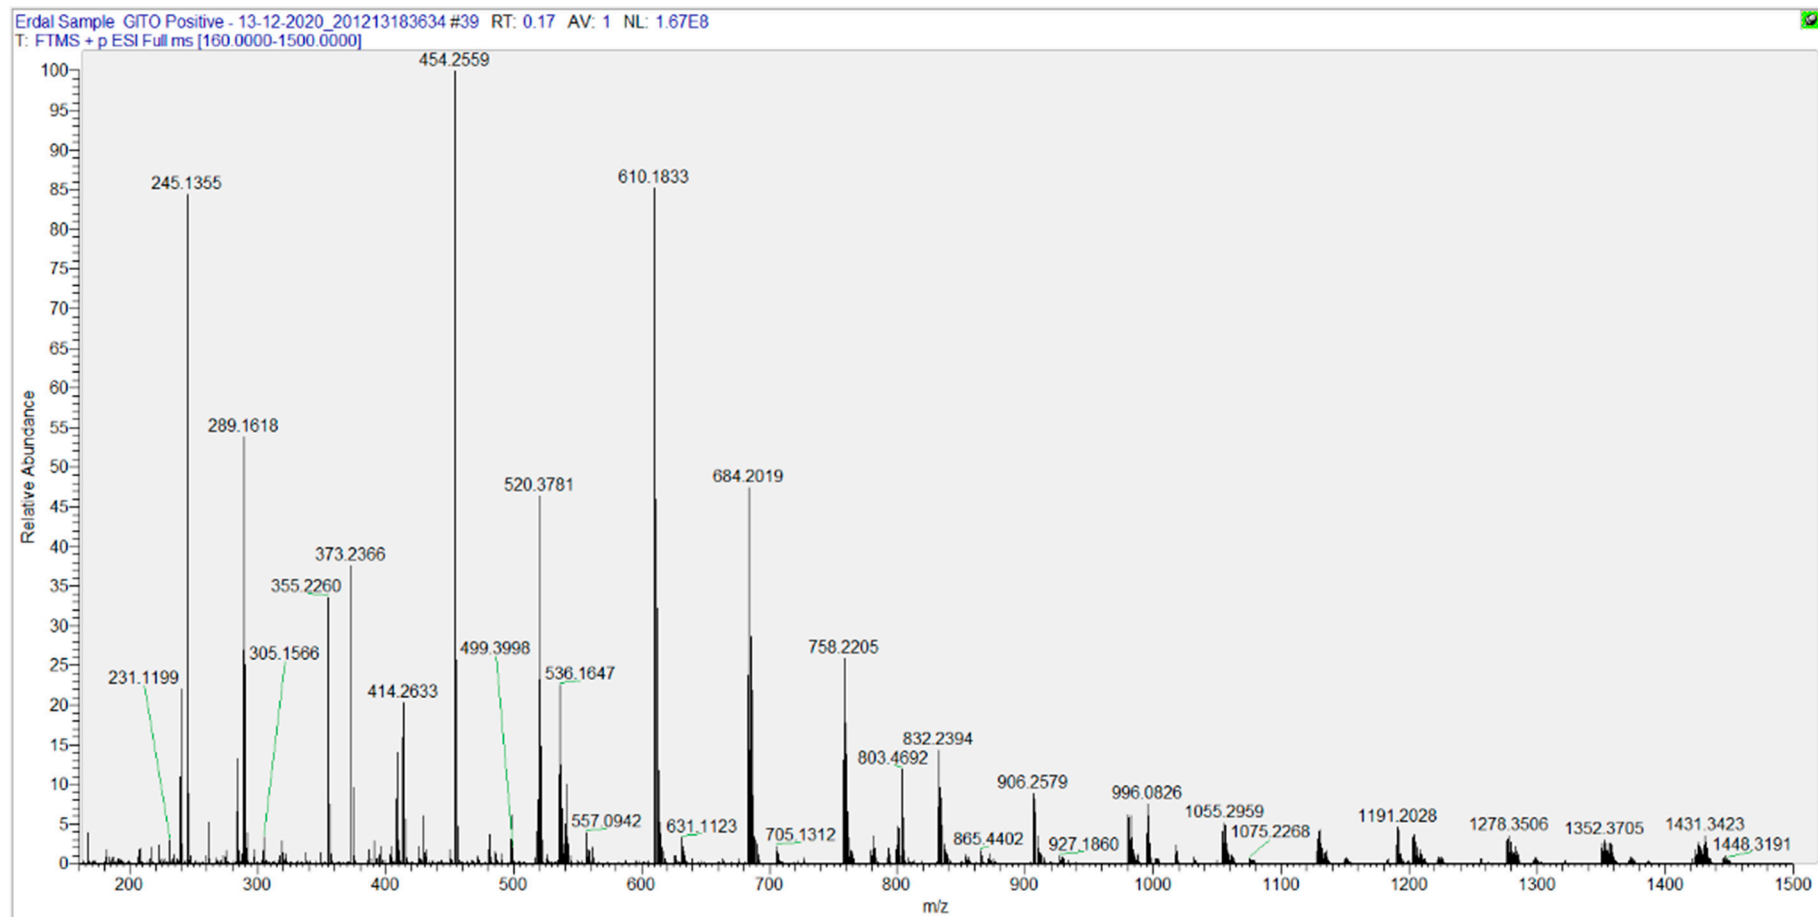

**Figure S2.** Positive-ion mode HR-ESI-MS spectrum of substrate gitoxigenin

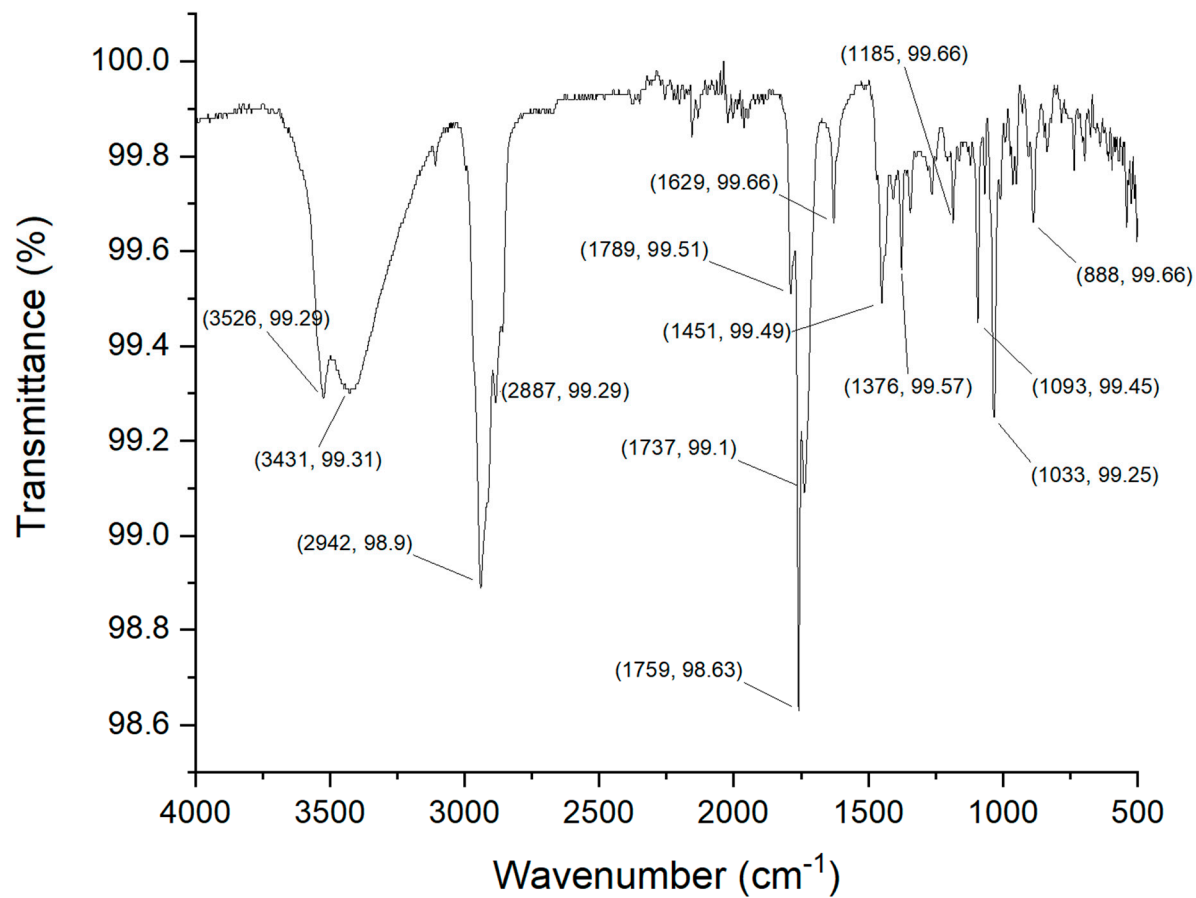

**Figure S3.** FT-IR Spectrum of substrate gitoxigenin

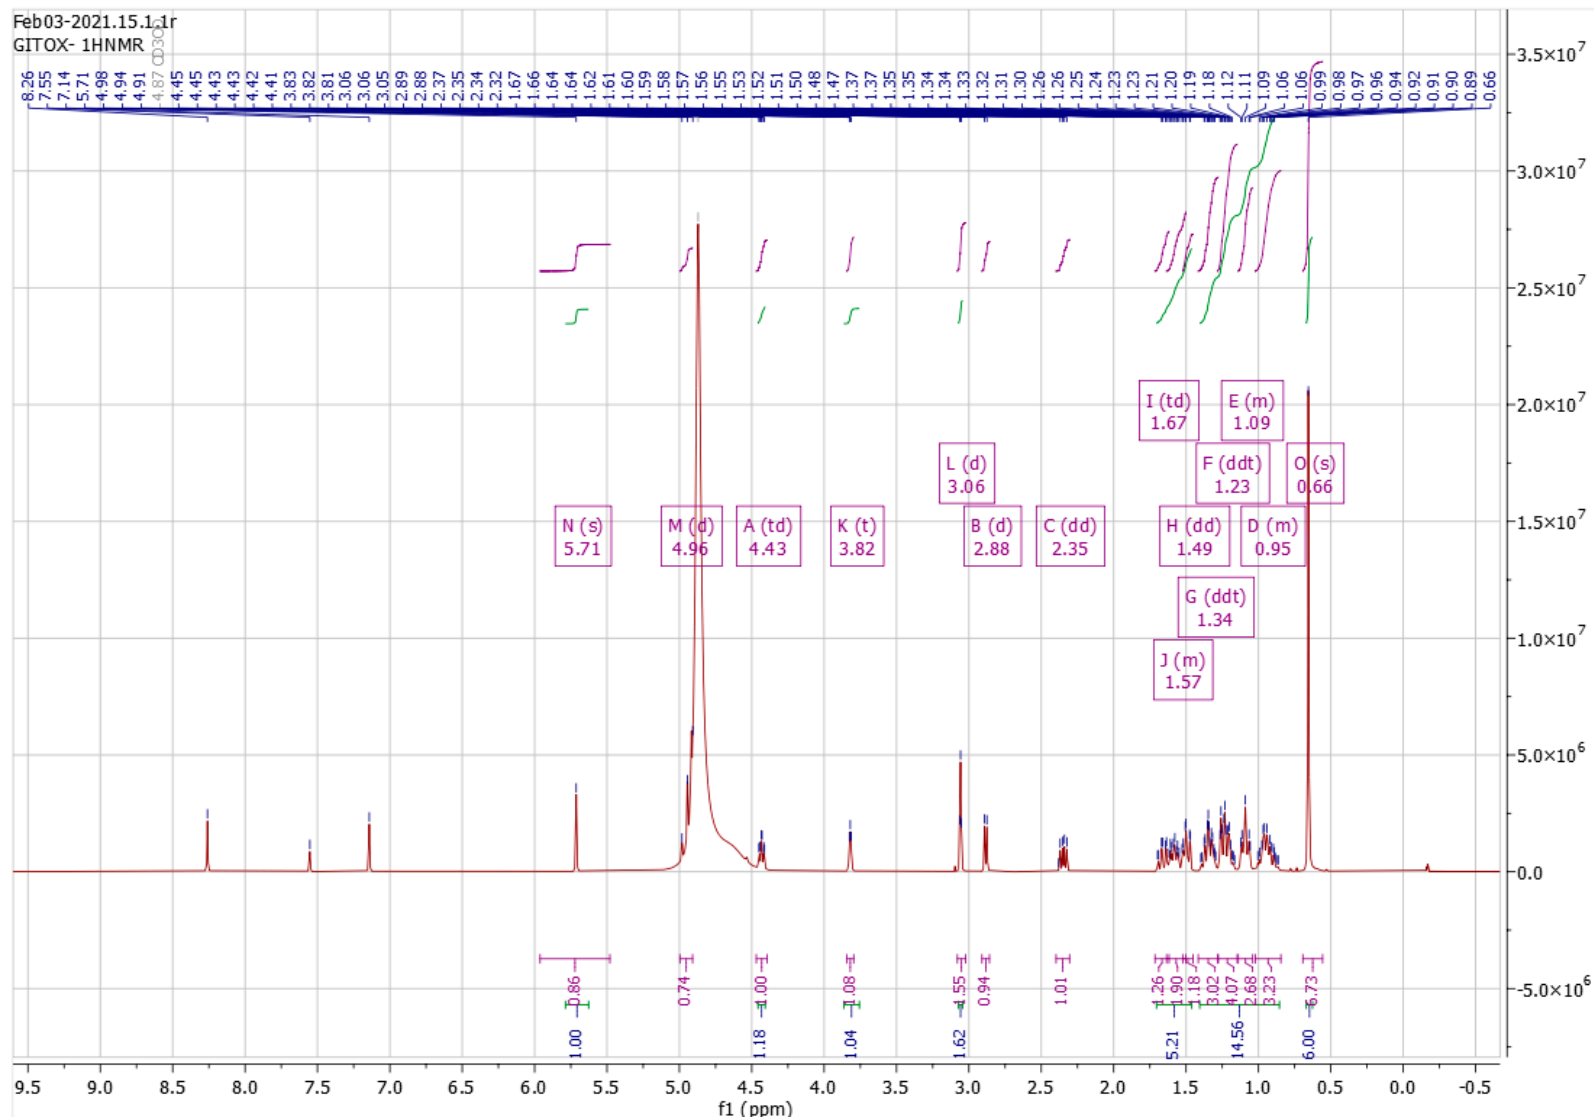

**Figure S4.**  $^1\text{H}$  NMR Spectrum of substrate gitoxigenin

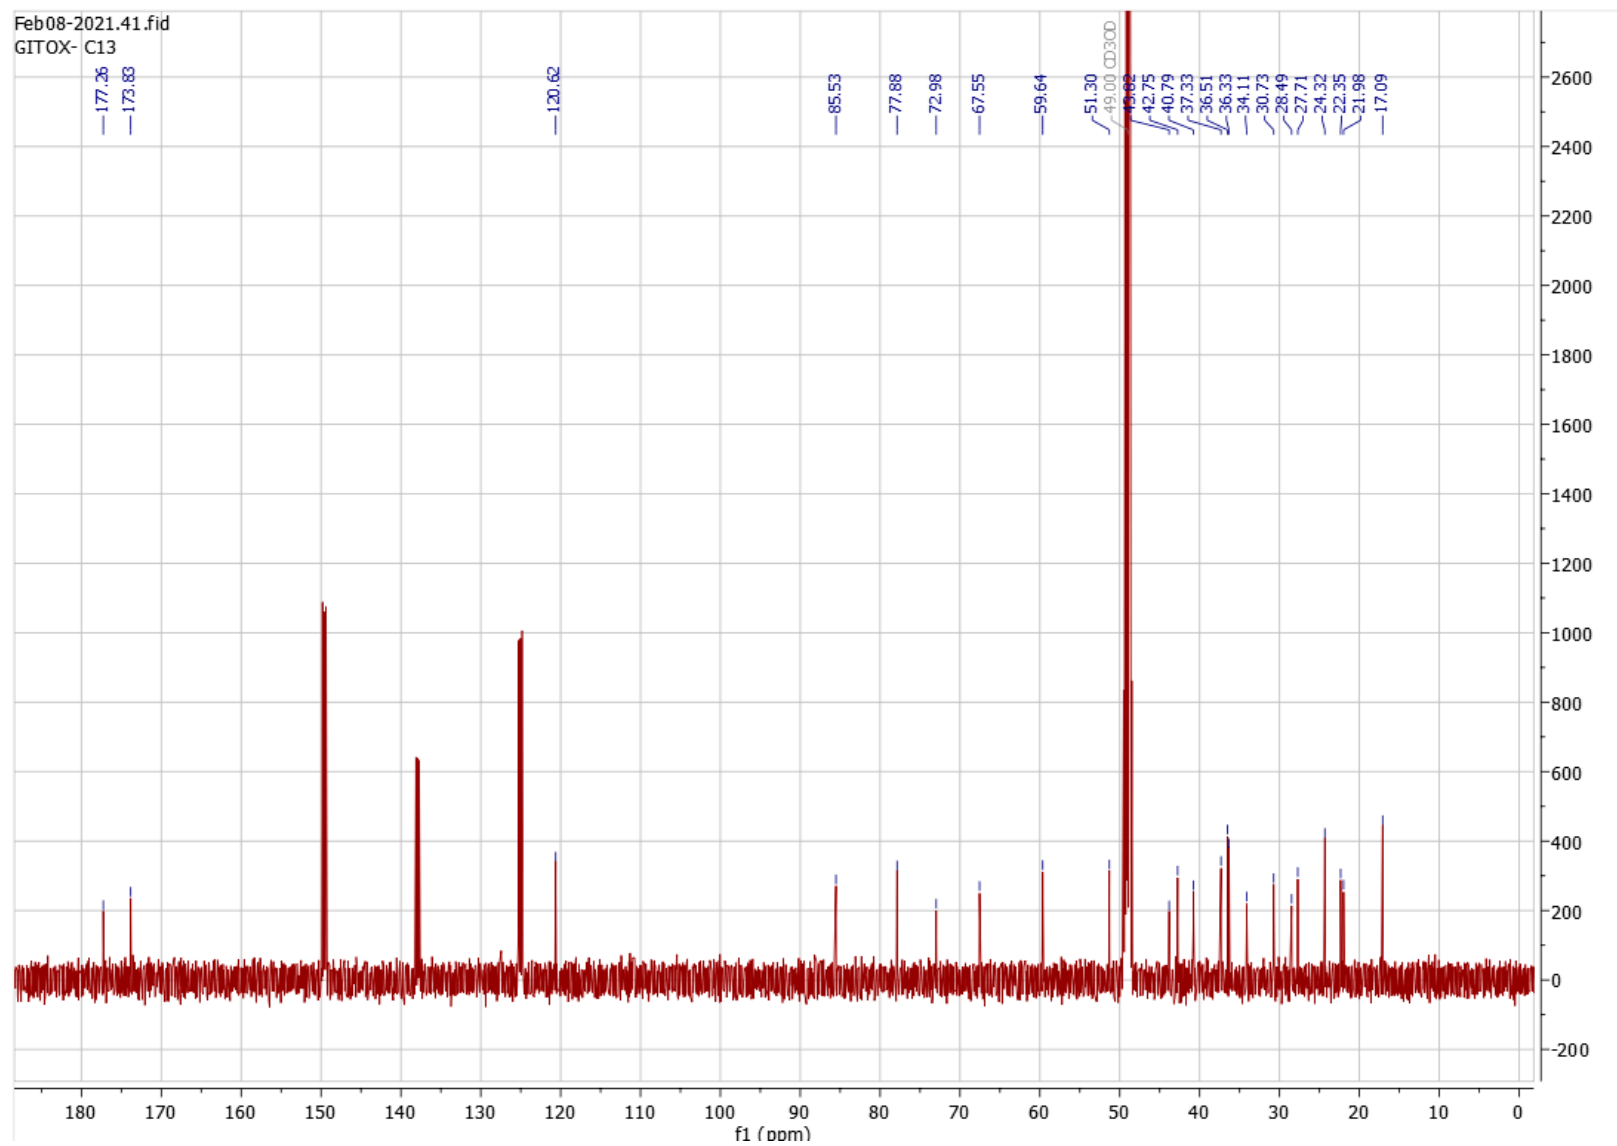

**Figure S5.**  $^{13}\text{C}$  NMR Spectrum of substrate gitoxigenin

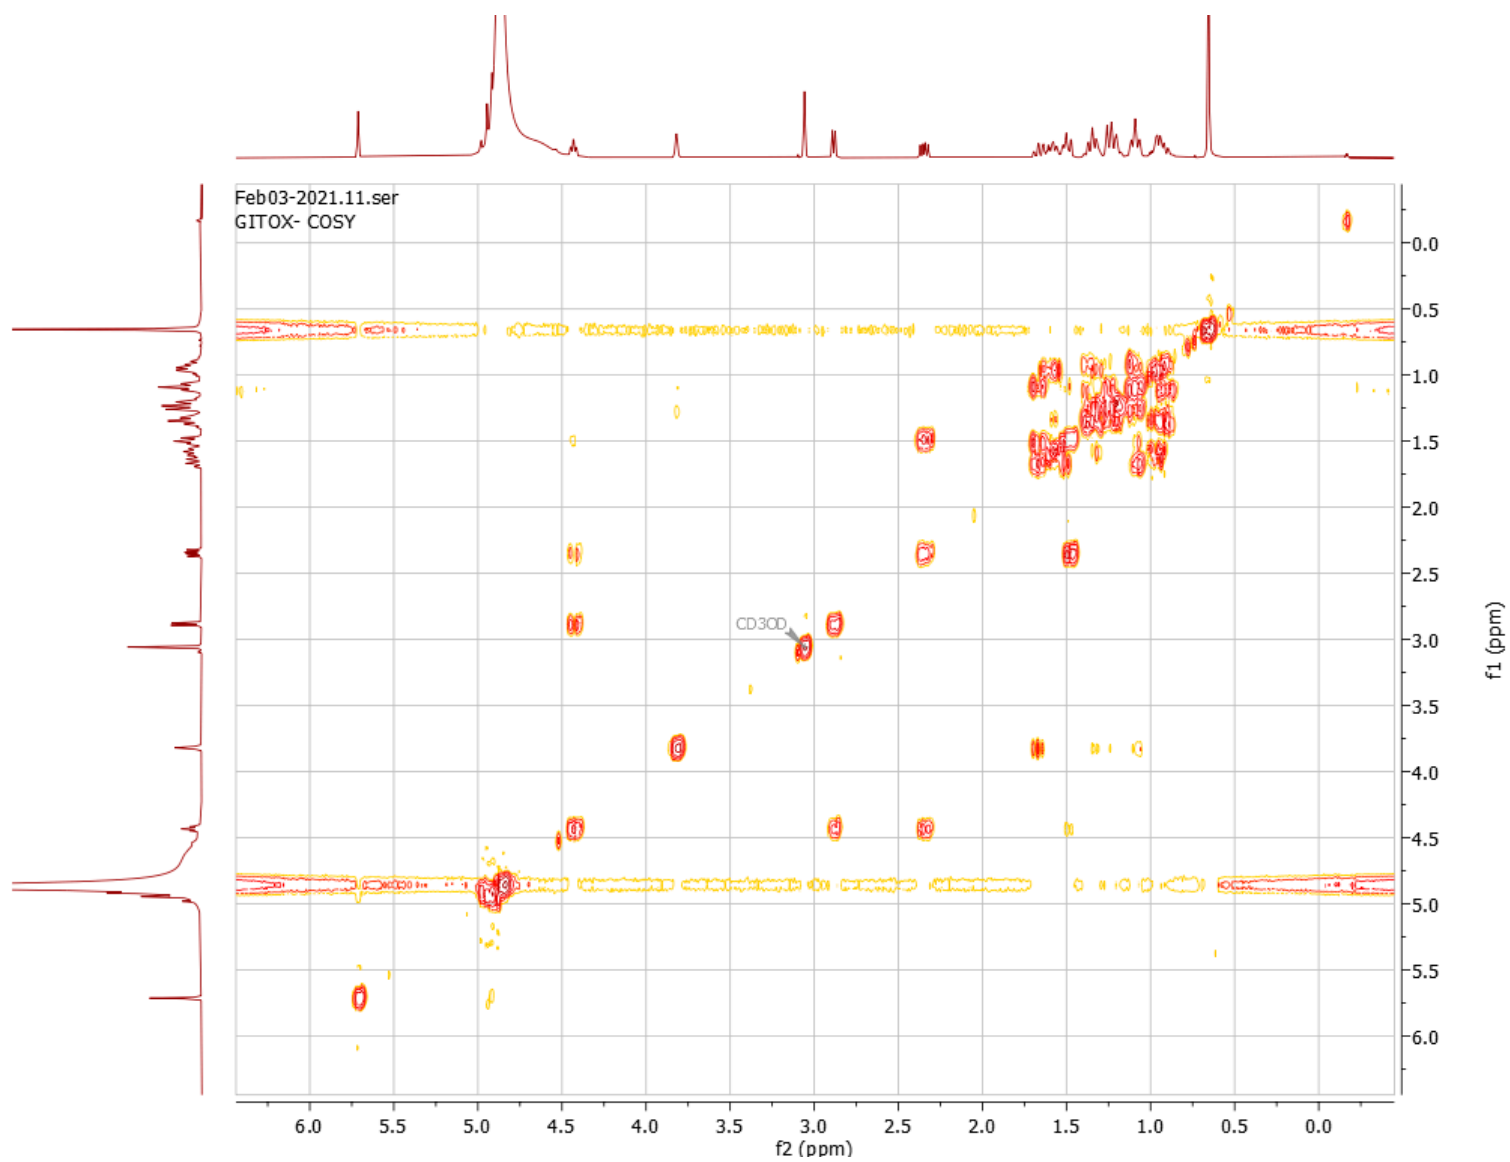

**Figure S6.** COSY Spectrum of substrate gitoxigenin

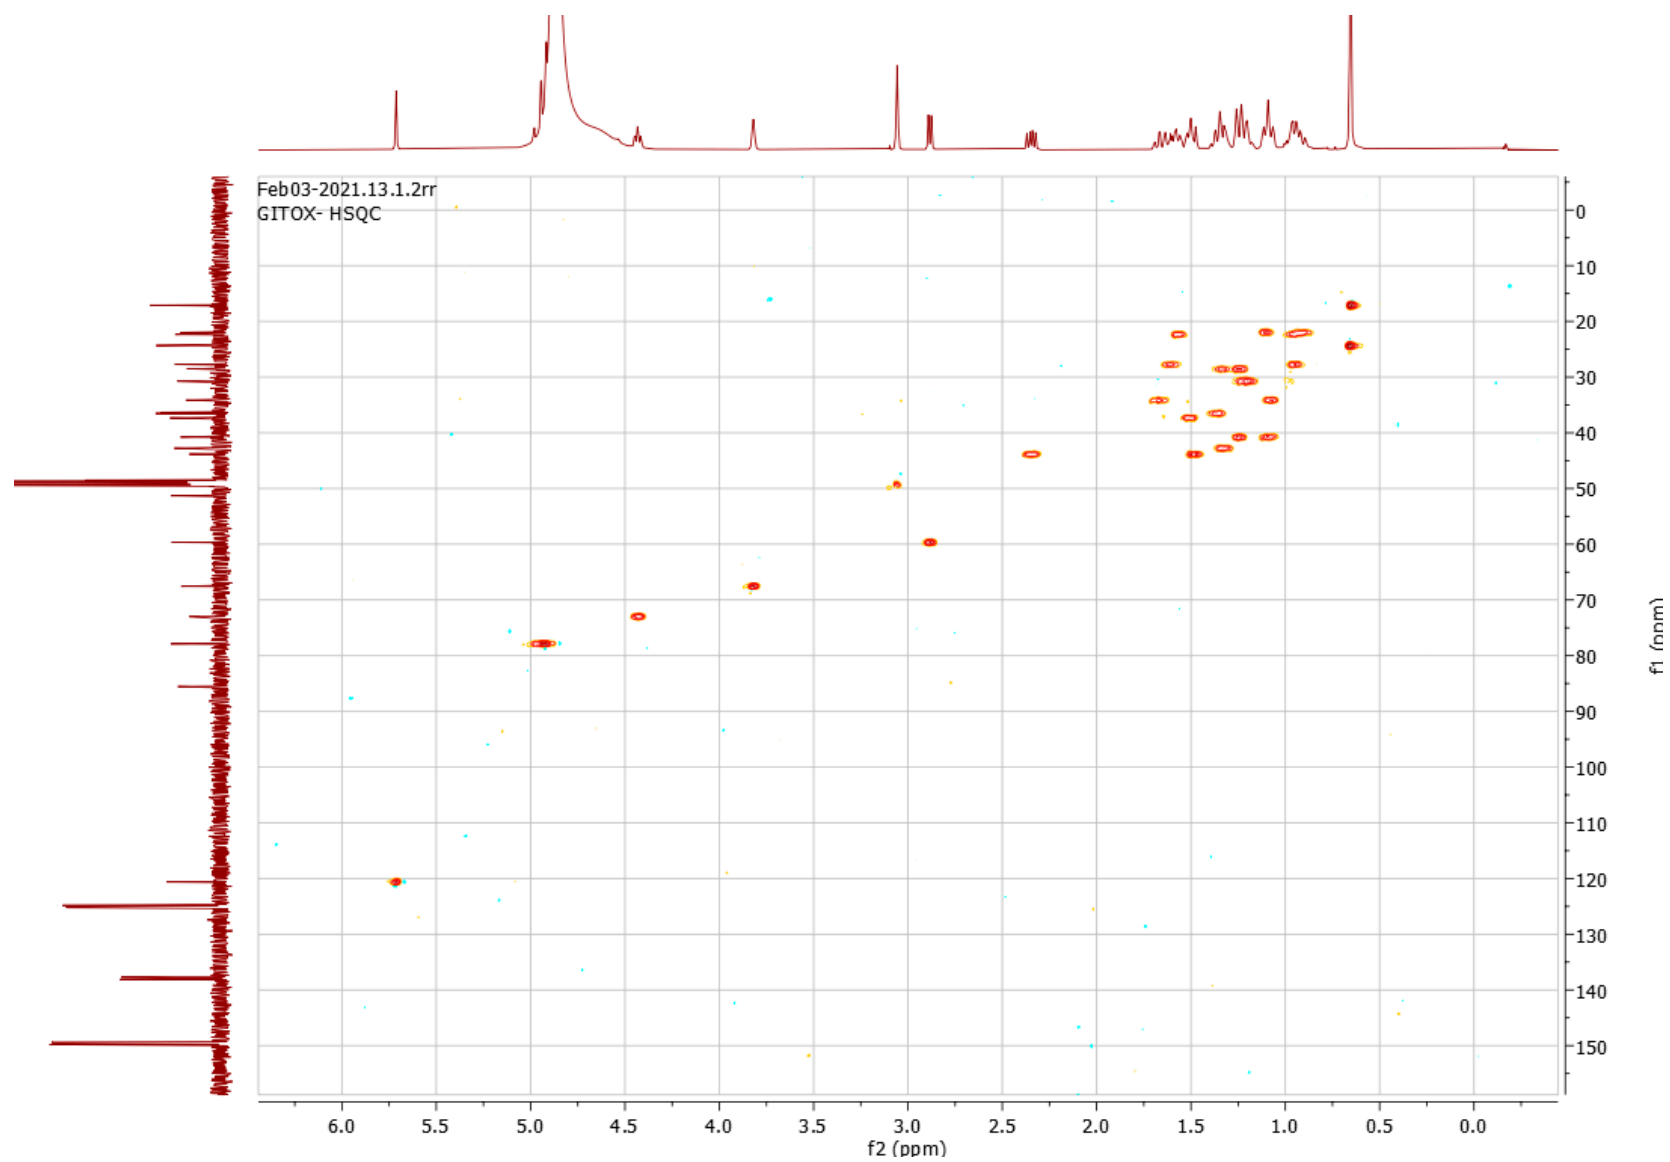

**Figure S7.** HSQC Spectrum of substrate gitoxigenin

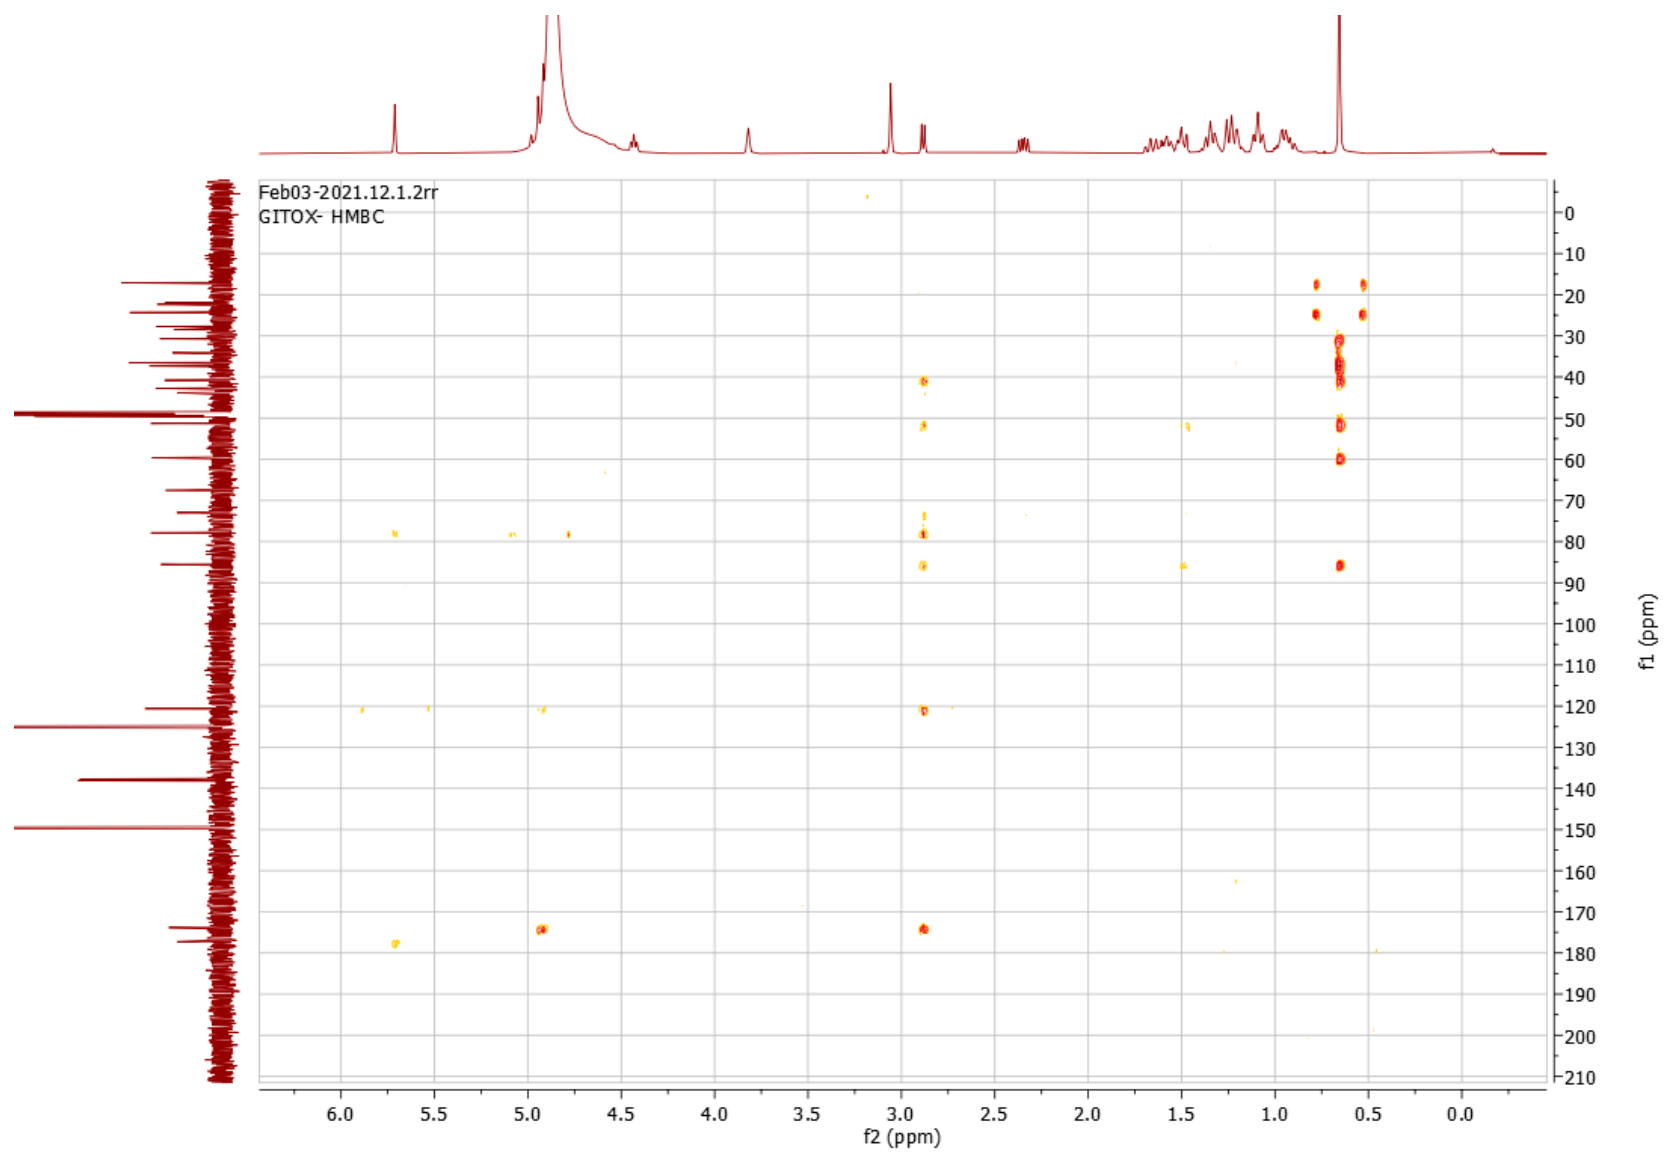

**Figure S8.** HMBC Spectrum of substrate gitoxigenin



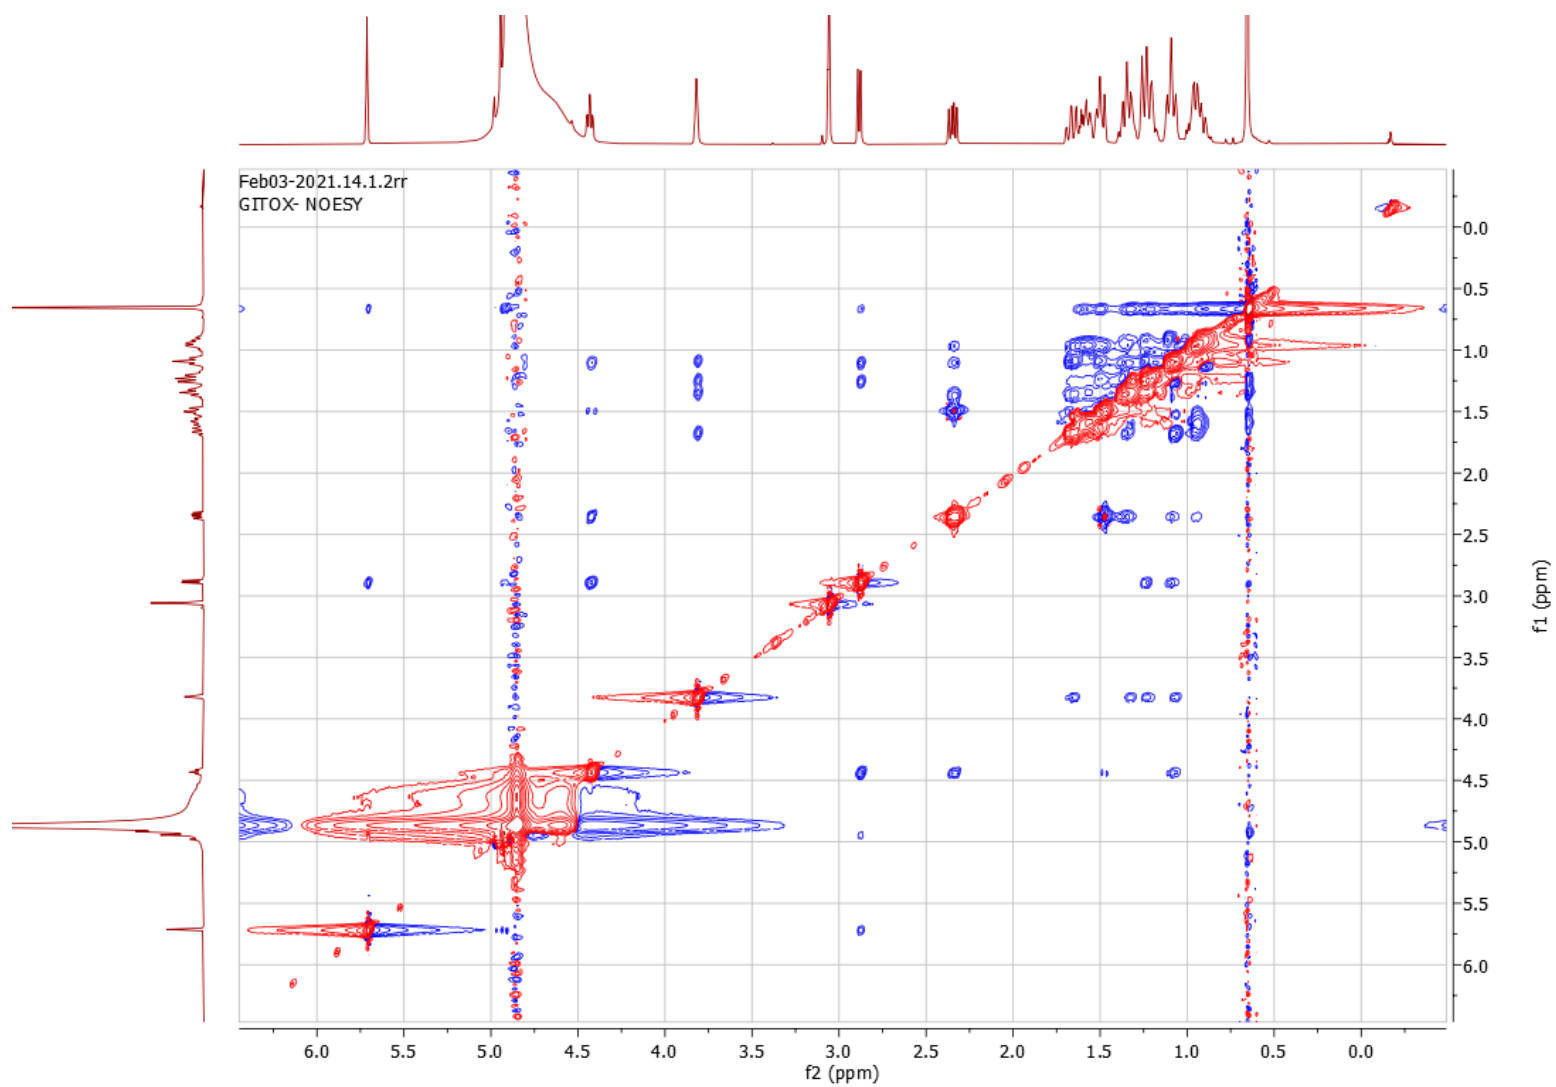

**Figure S9.** NOESY Spectrum of substrate gitoxigenin

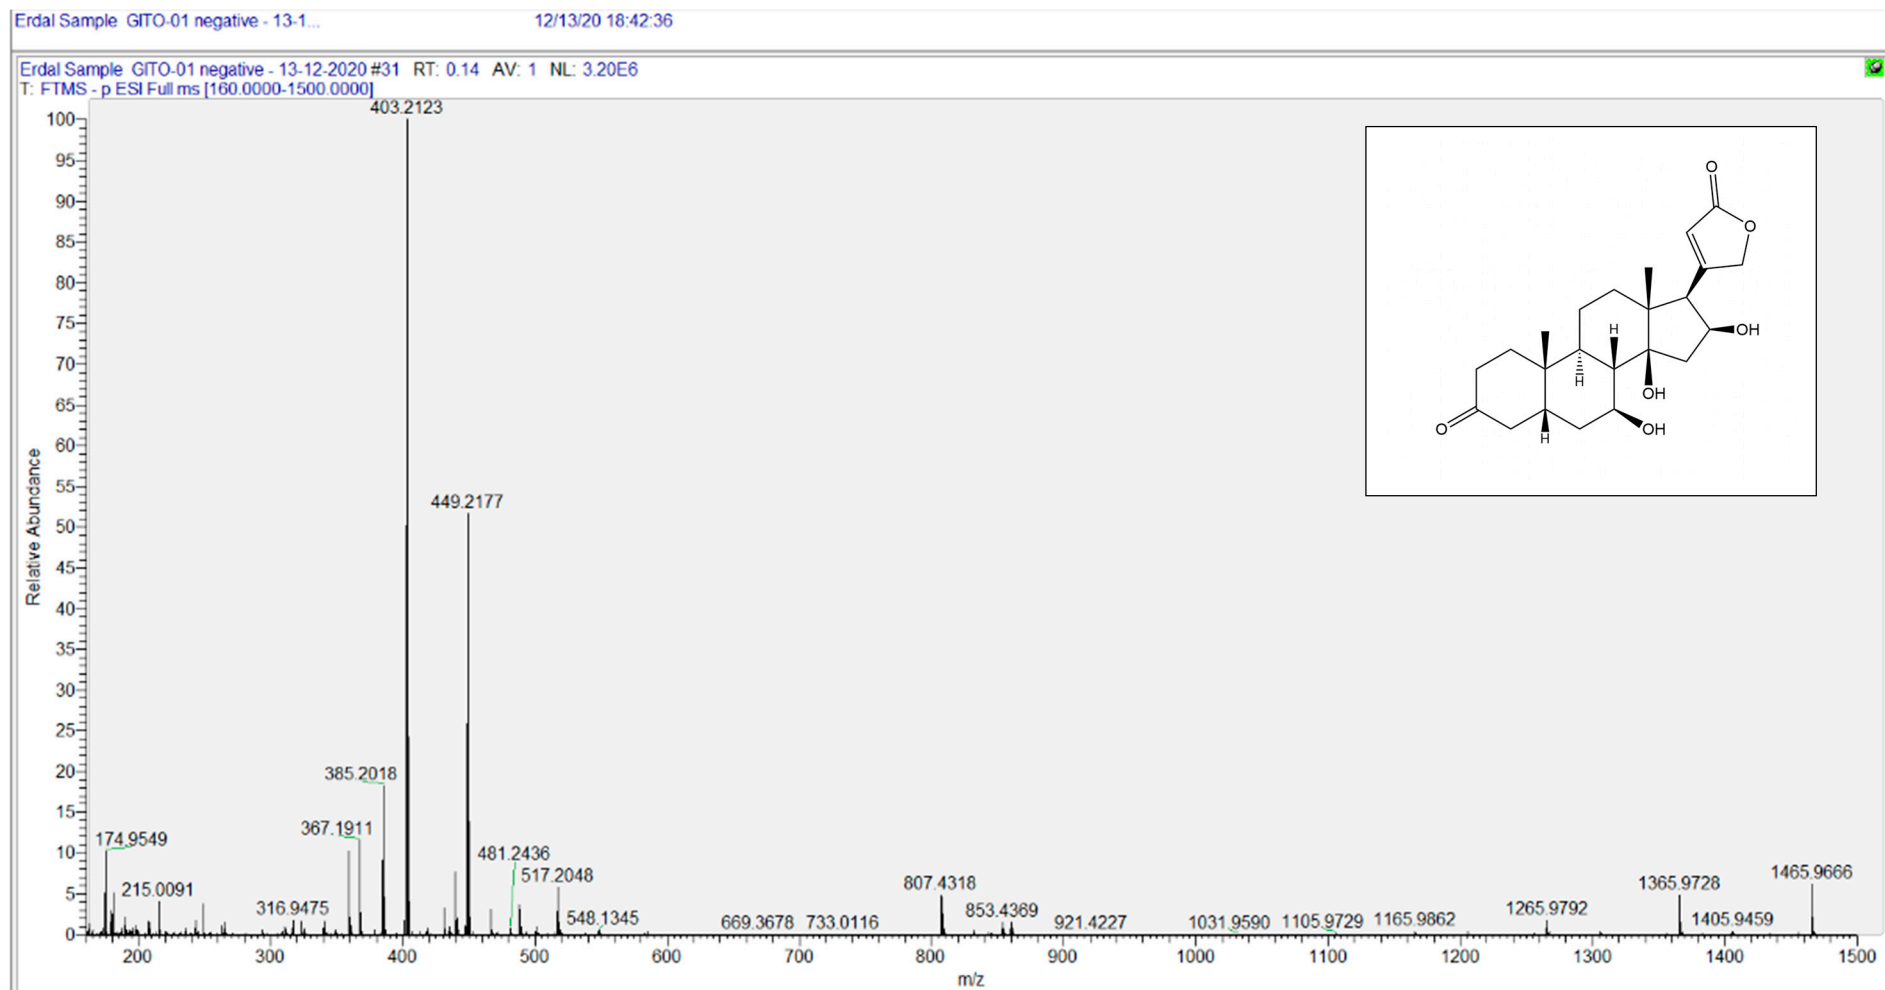

**Figure S10.** Negative-ion mode HR-ESI-MS spectrum of 7( $\beta$ )-hydroxy-3-oxo-gitoxigenin (**compound 1**)

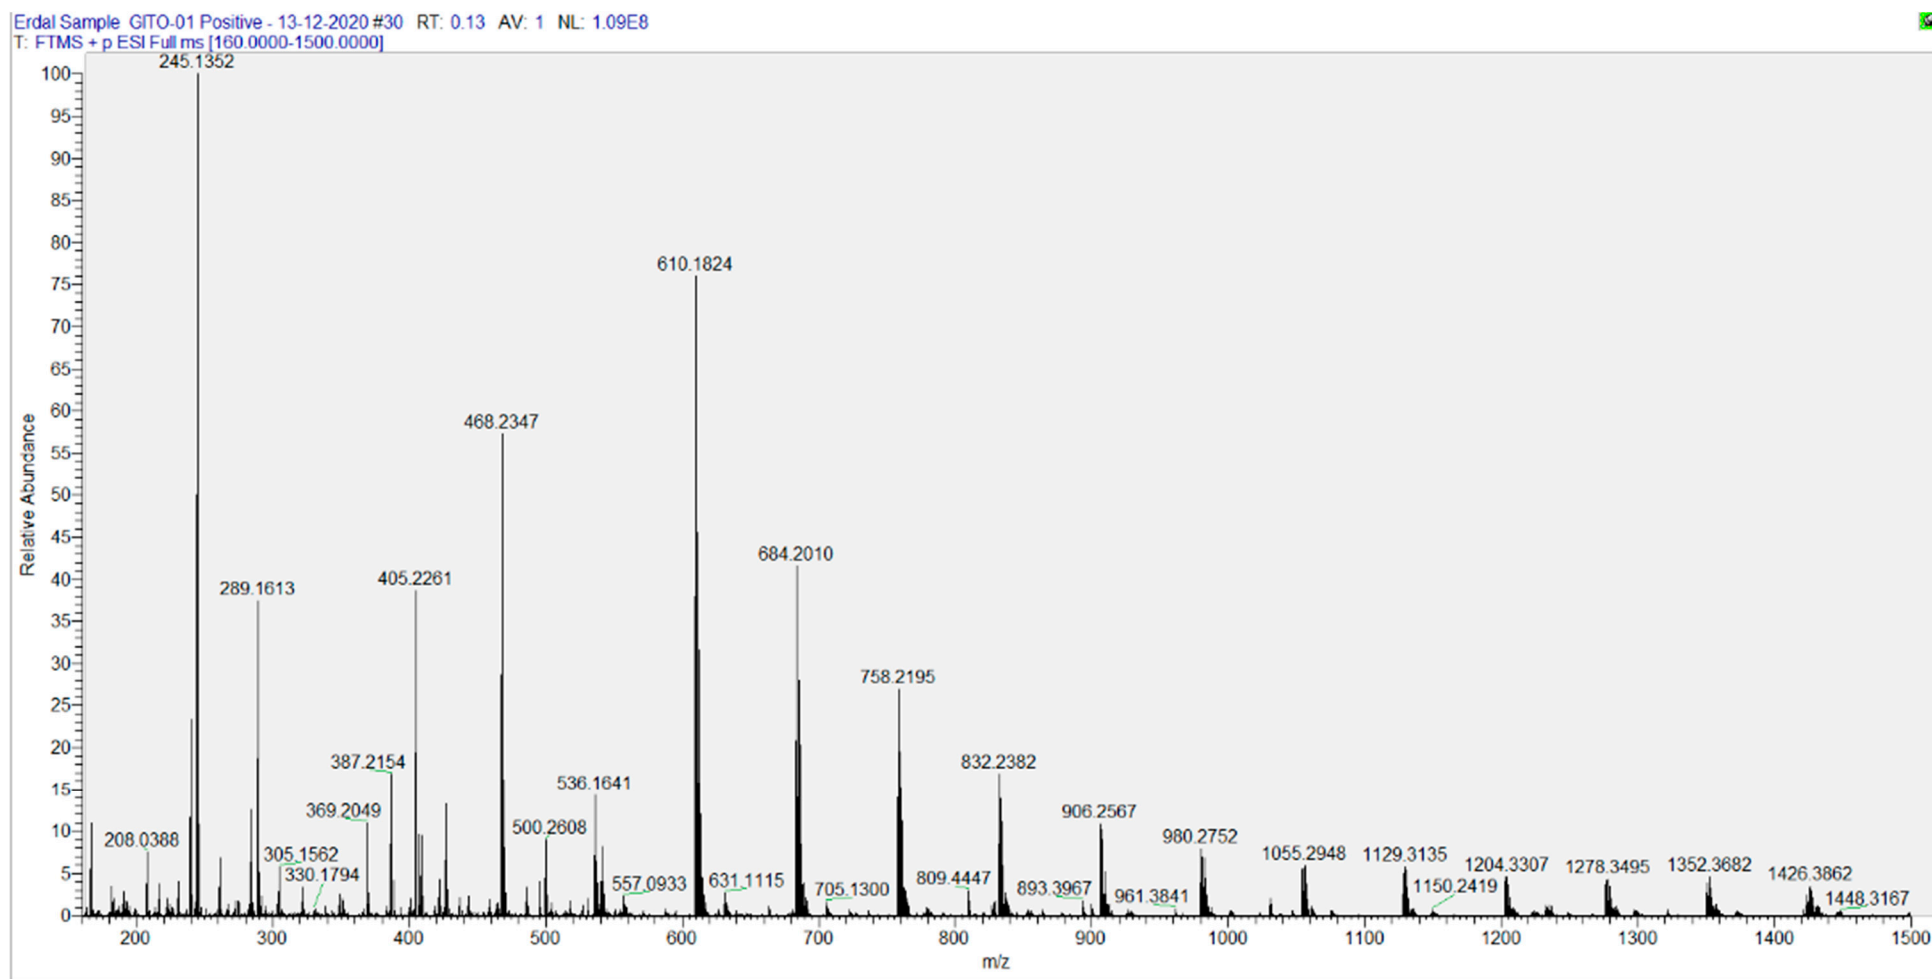

**Figure S11.** Positive-ion mode HR-ESI-MS spectrum of 7( $\beta$ )-hydroxy-3-oxo-gitoxigenin (**compound 1**)

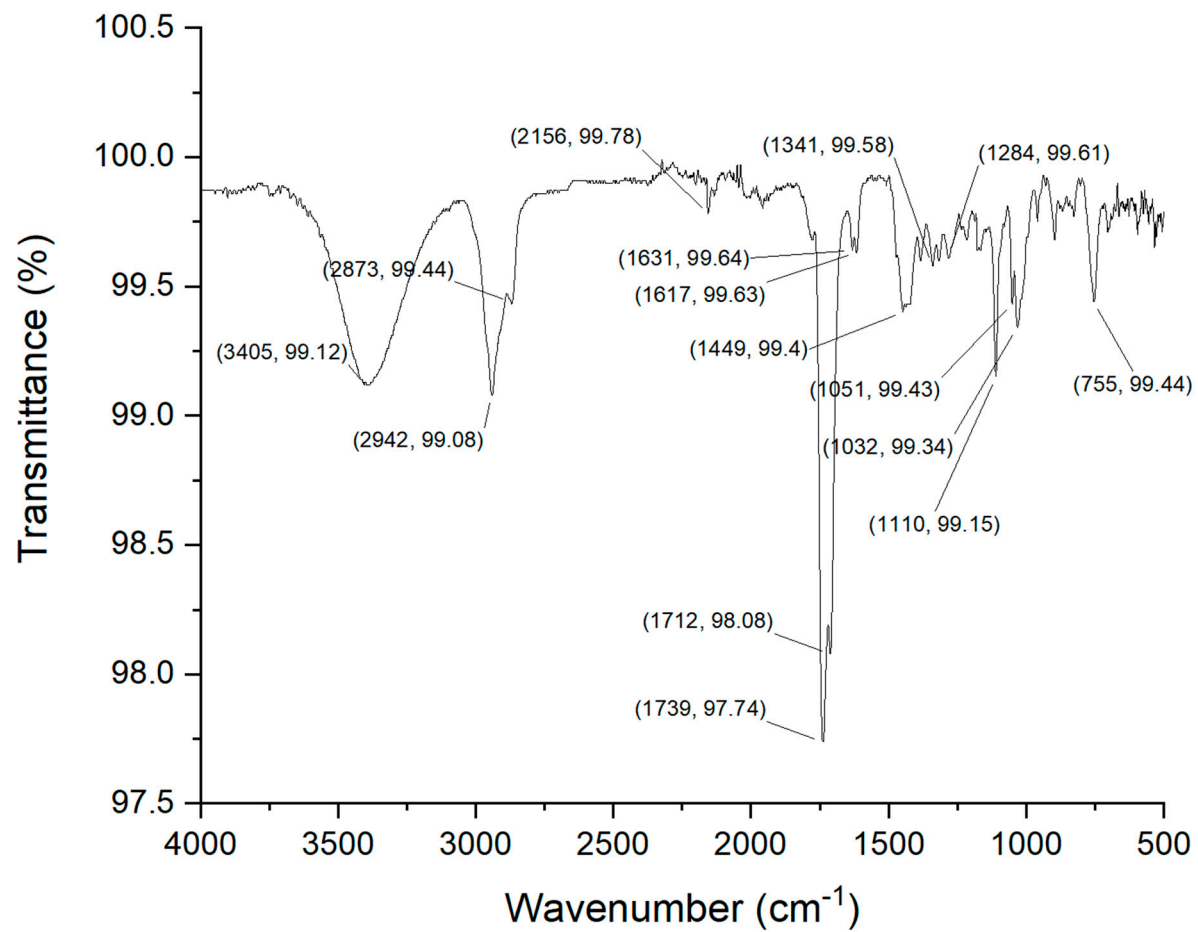

**Figure S12.** FT-IR Spectrum of 7( $\beta$ )-hydroxy-3-oxo-gitoxigenin (**compound 1**)

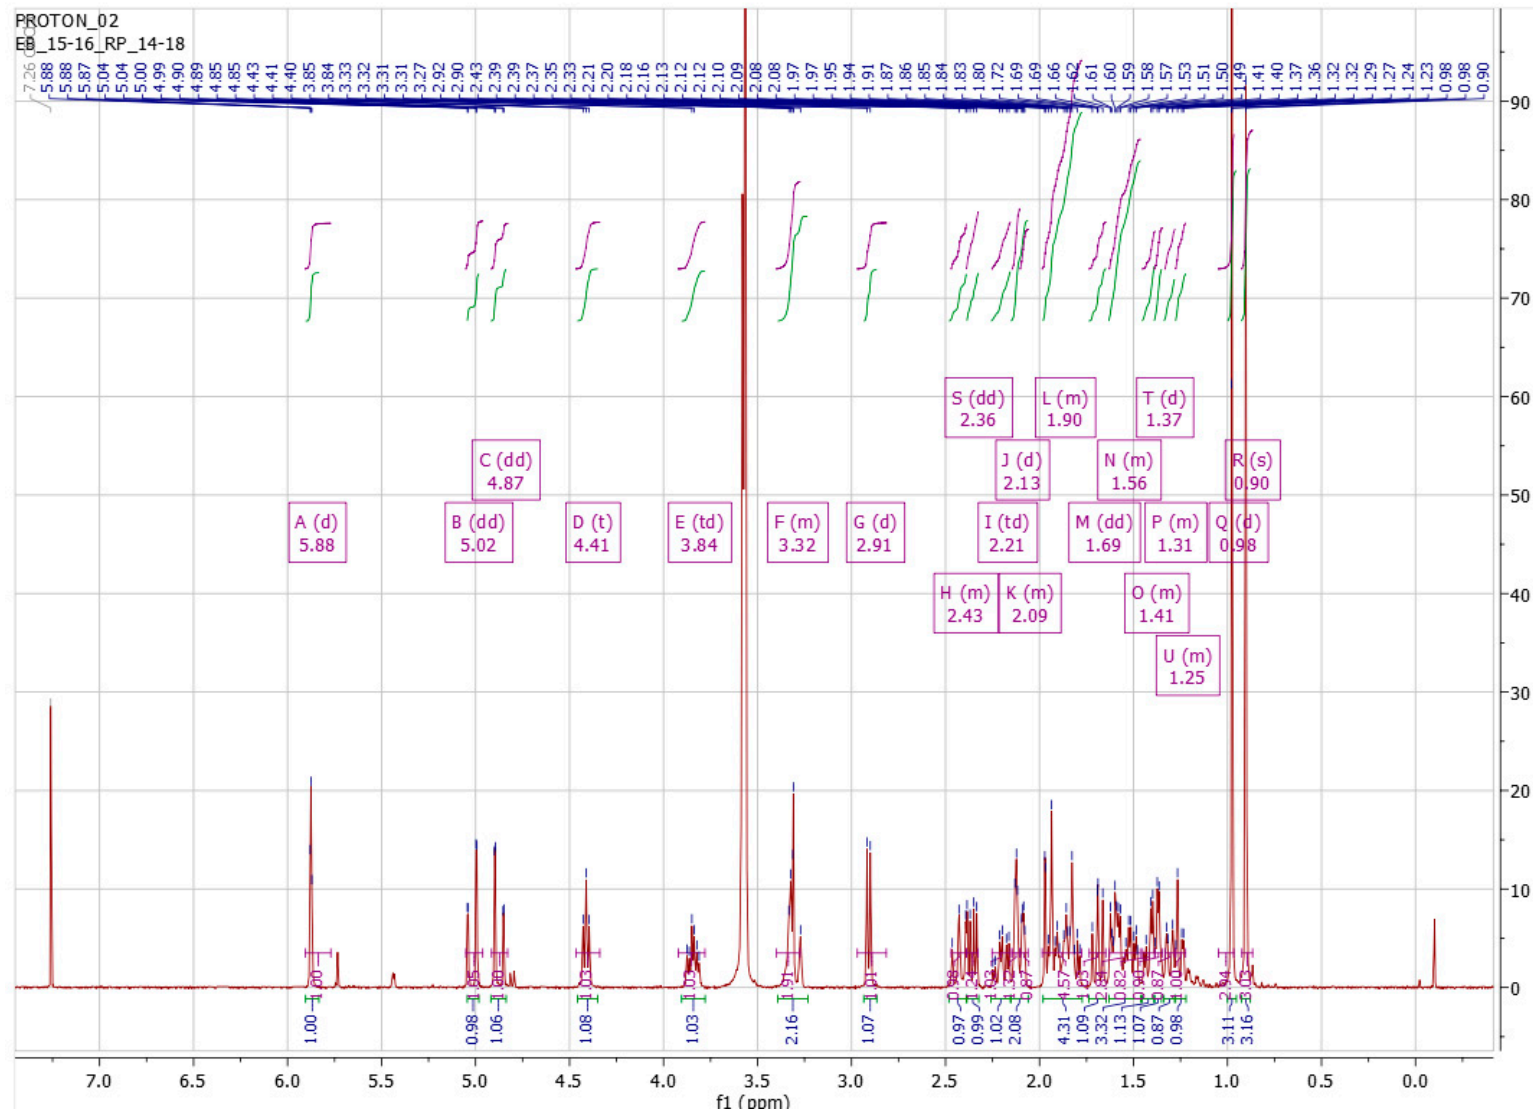

**Figure S13.**  $^1\text{H}$  NMR Spectrum of 7( $\beta$ )-hydroxy-3-oxo-gitoxigenin (compound 1)

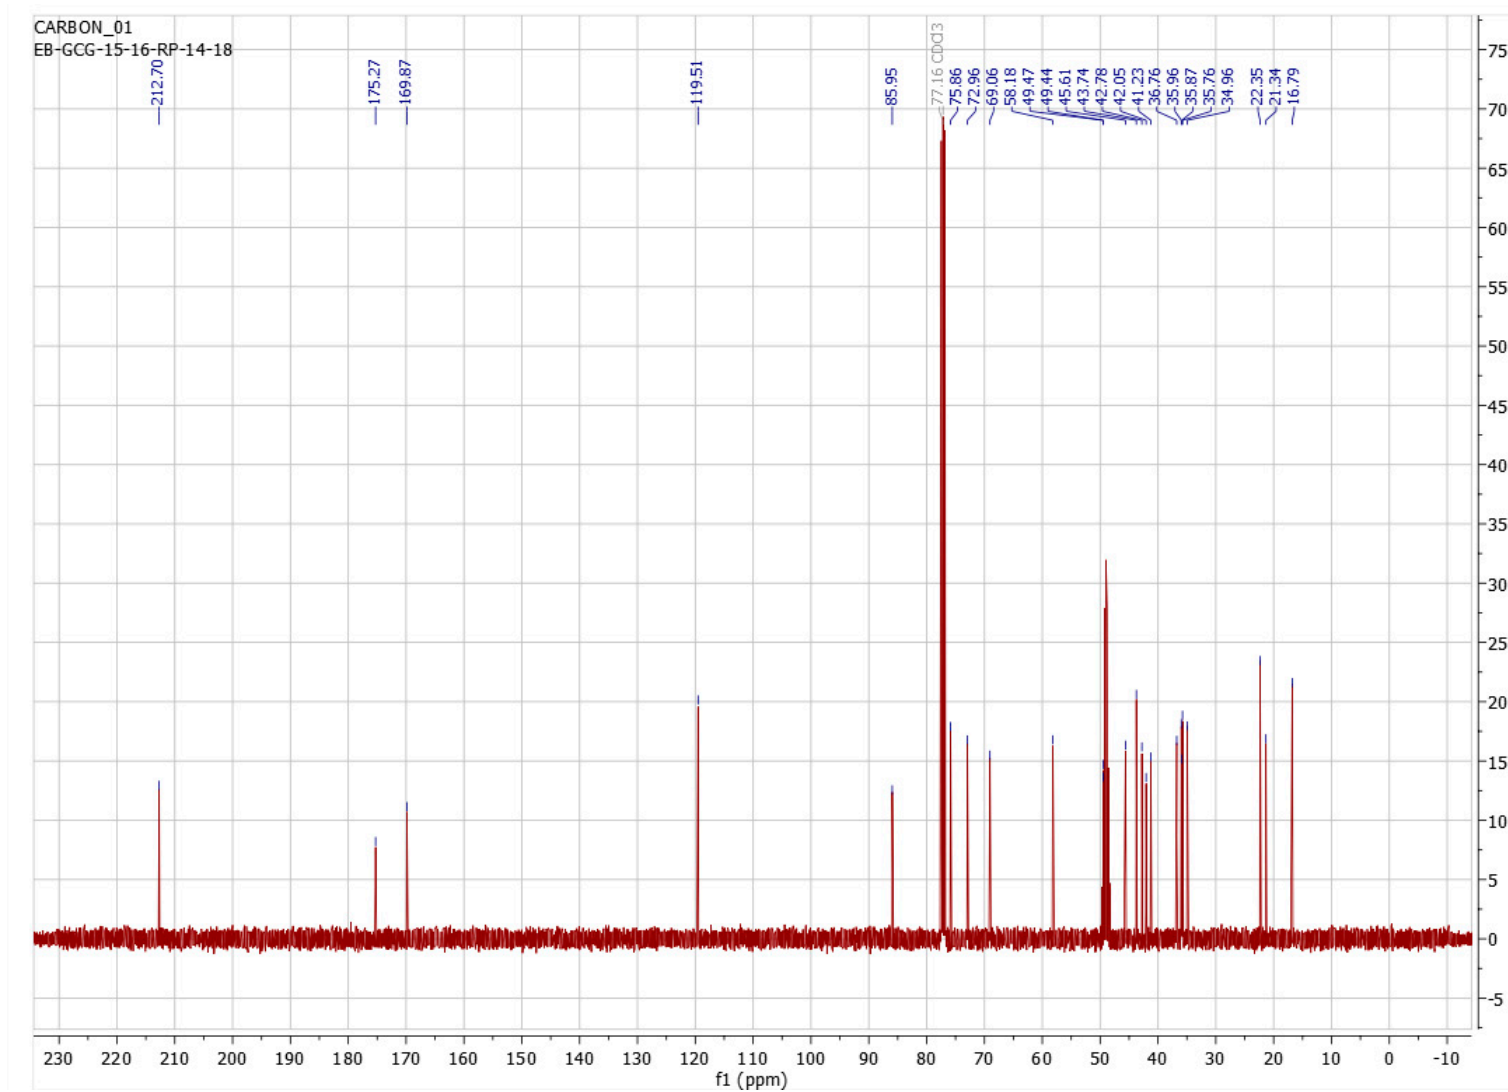

**Figure S14.**  $^{13}\text{C}$  NMR Spectrum of 7( $\beta$ )-hydroxy-3-oxo-gitoxigenin (compound 1)

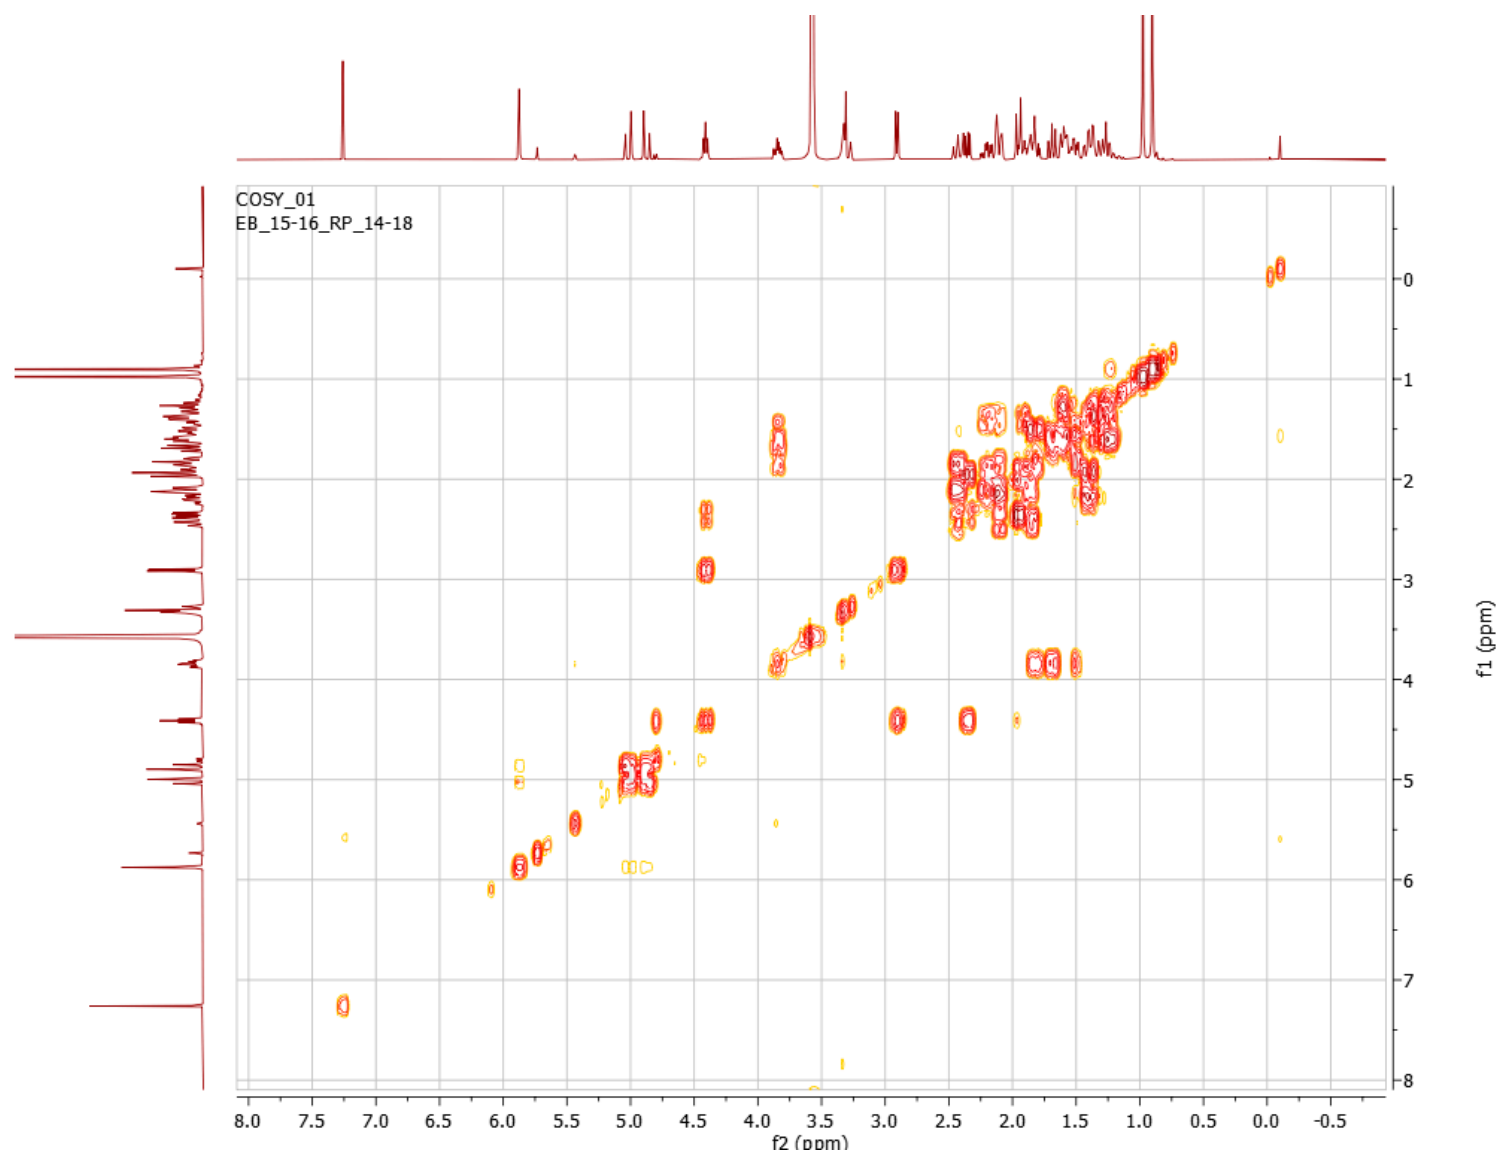

**Figure S15.** COSY Spectrum of 7( $\beta$ )-hydroxy-3-oxo-gitoxigenin (**compound 1**)

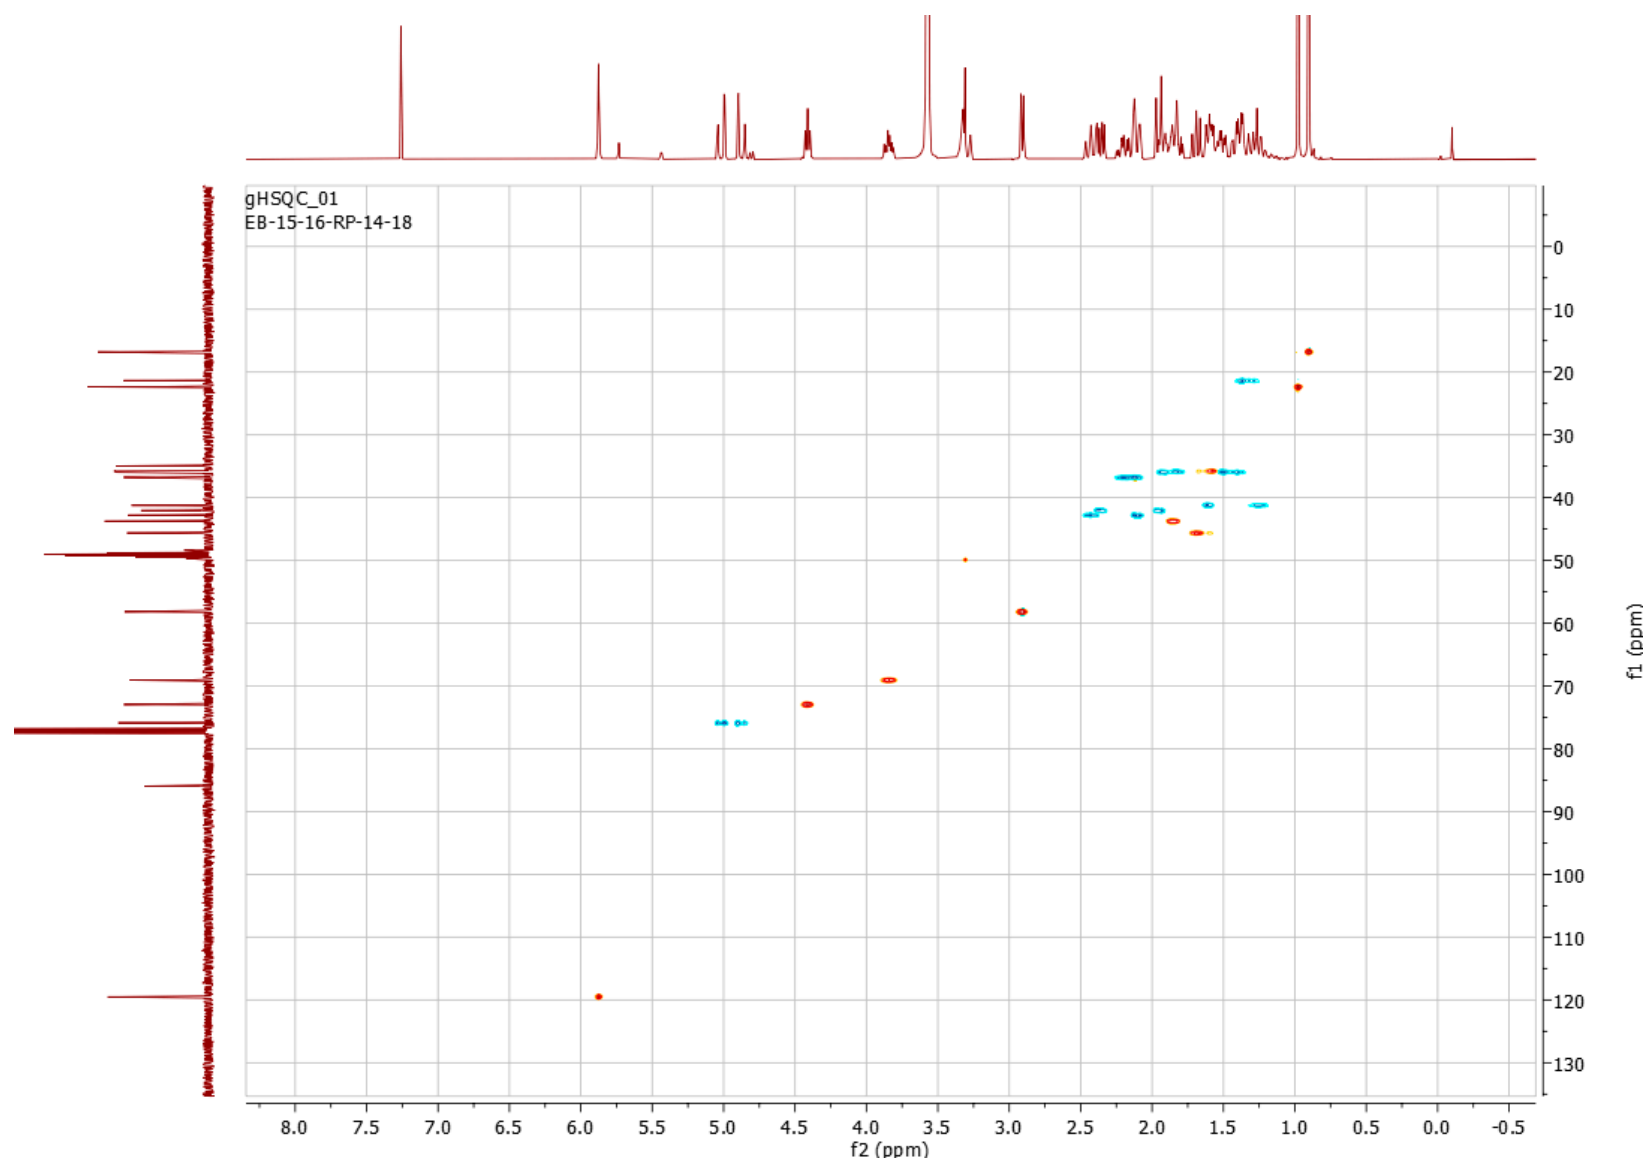

**Figure S16.** HSQC Spectrum of 7( $\beta$ )-hydroxy-3-oxo-gitoxigenin (**compound 1**)



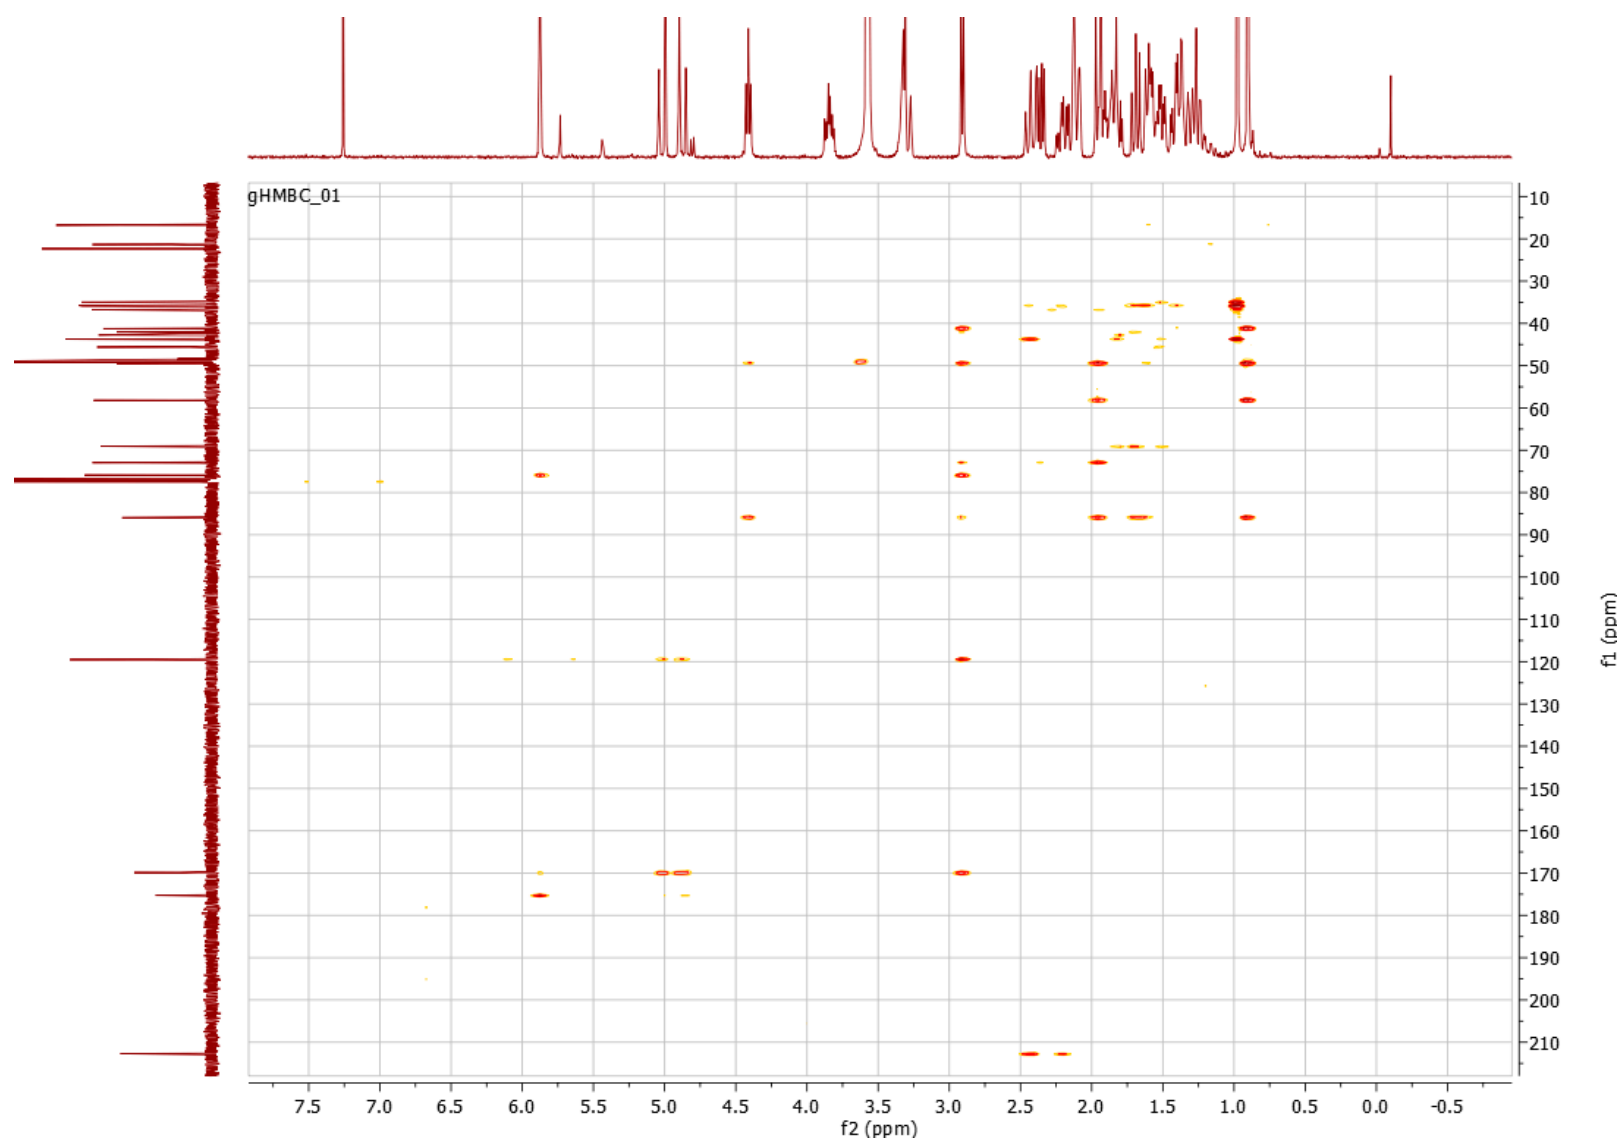

**Figure S17.** HMBC Spectrum of 7( $\beta$ )-hydroxy-3-oxo-gitoxigenin (**compound 1**)

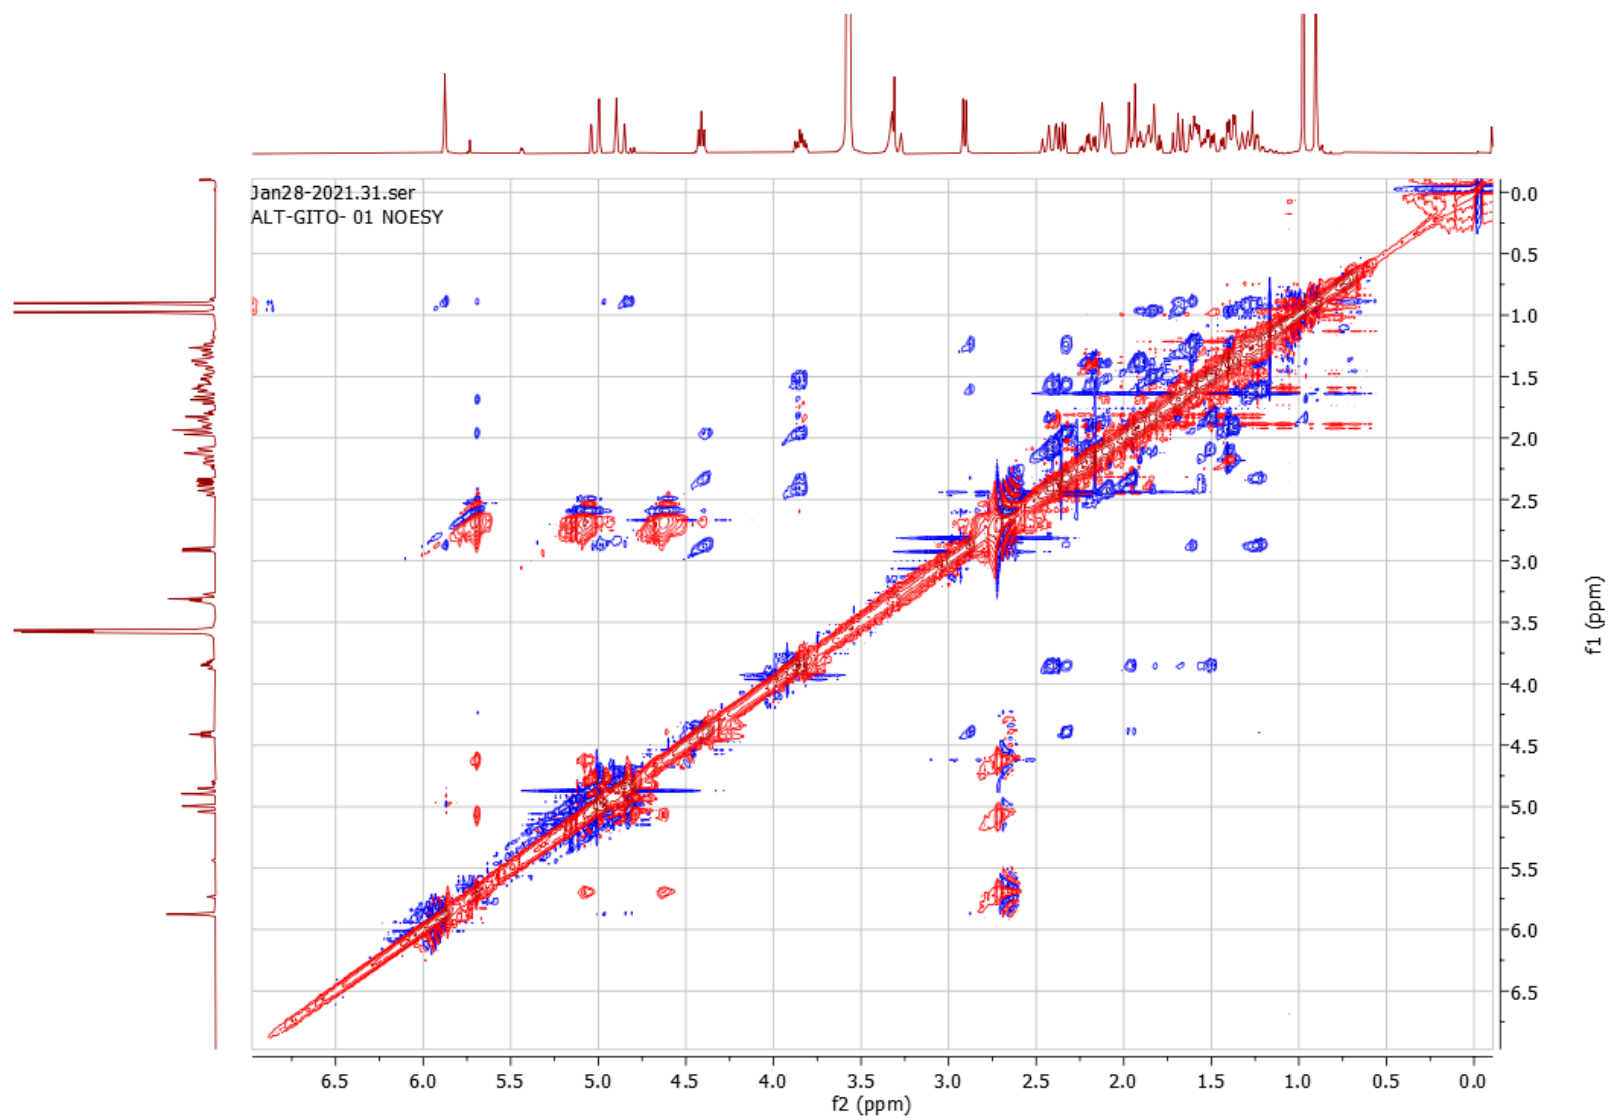

**Figure S18.** NOESY Spectrum of 7( $\beta$ )-hydroxy-3-oxo-gitoxigenin (**compound 1**)

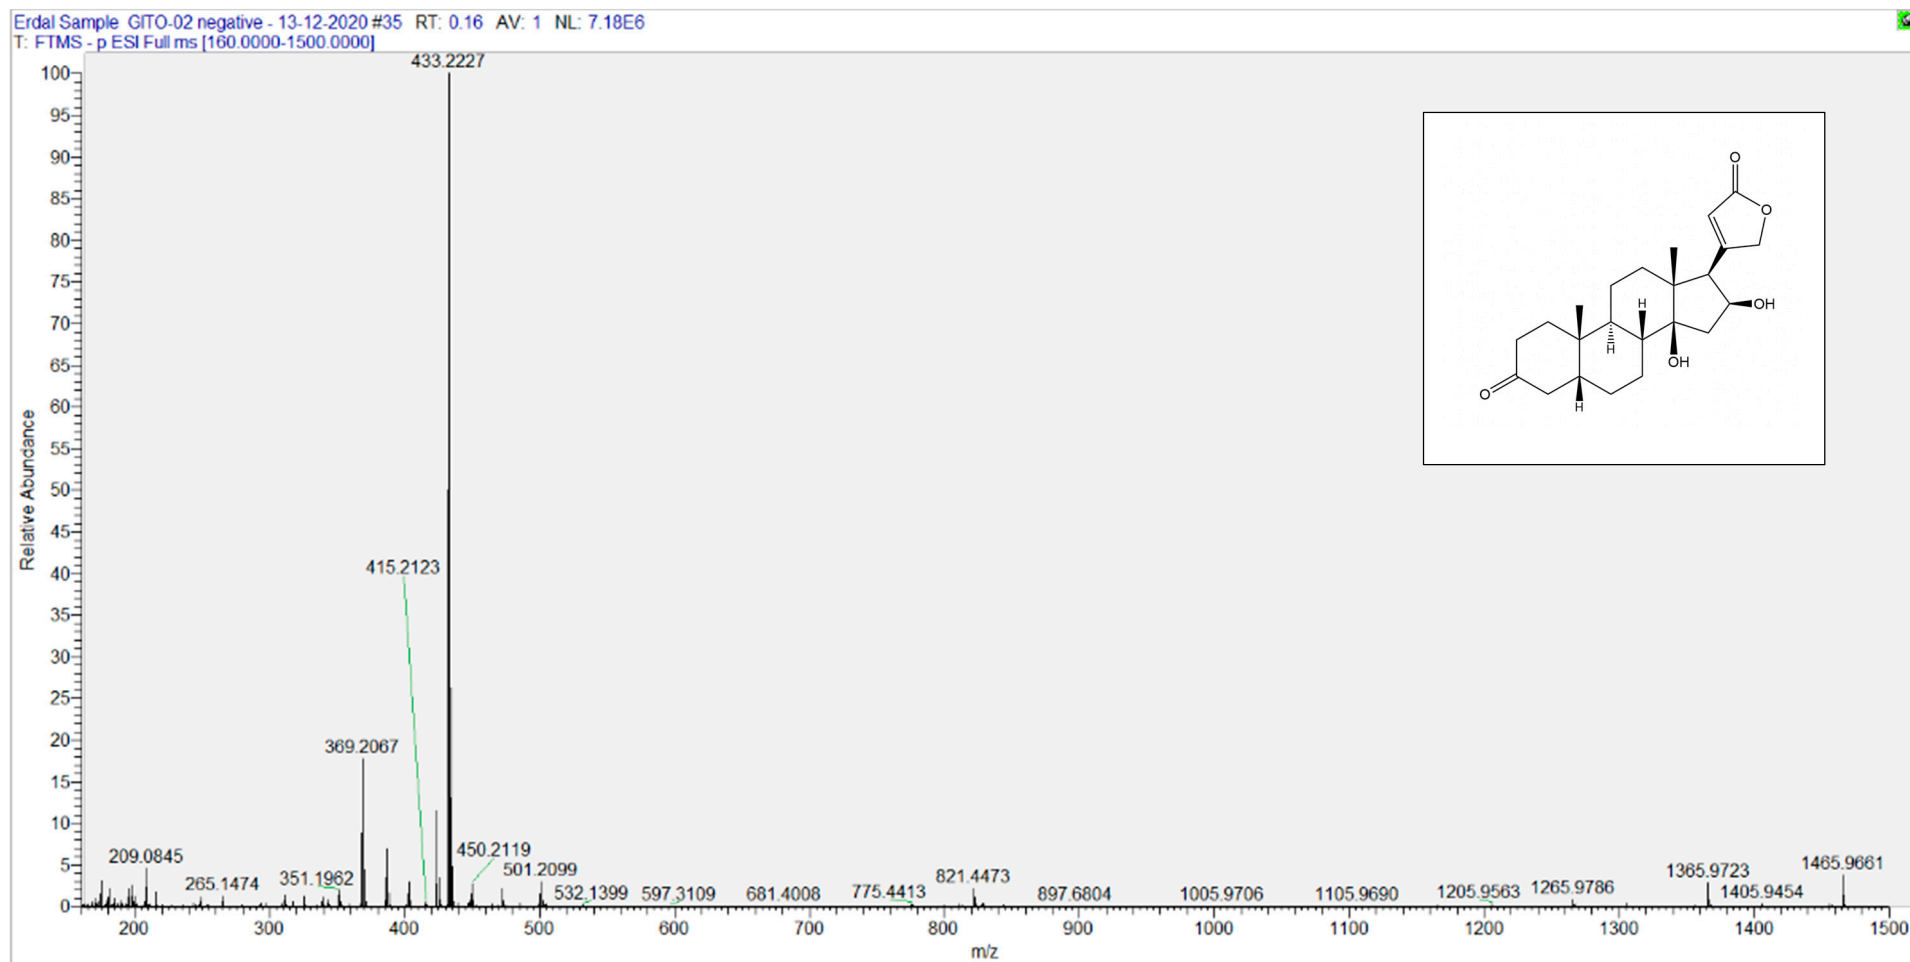

**Figure S19.** Negative-ion mode HR-ESI-MS spectrum of 3-oxo-gitoxigenin (**compound 2**)

Erdal Sample GITO-02 Positive - 13-12-2020 #33 RT: 0.14 AV: 1 NL: 3.24E8  
T: FTMS + p ESI Full ms [160.0000-1500.0000]

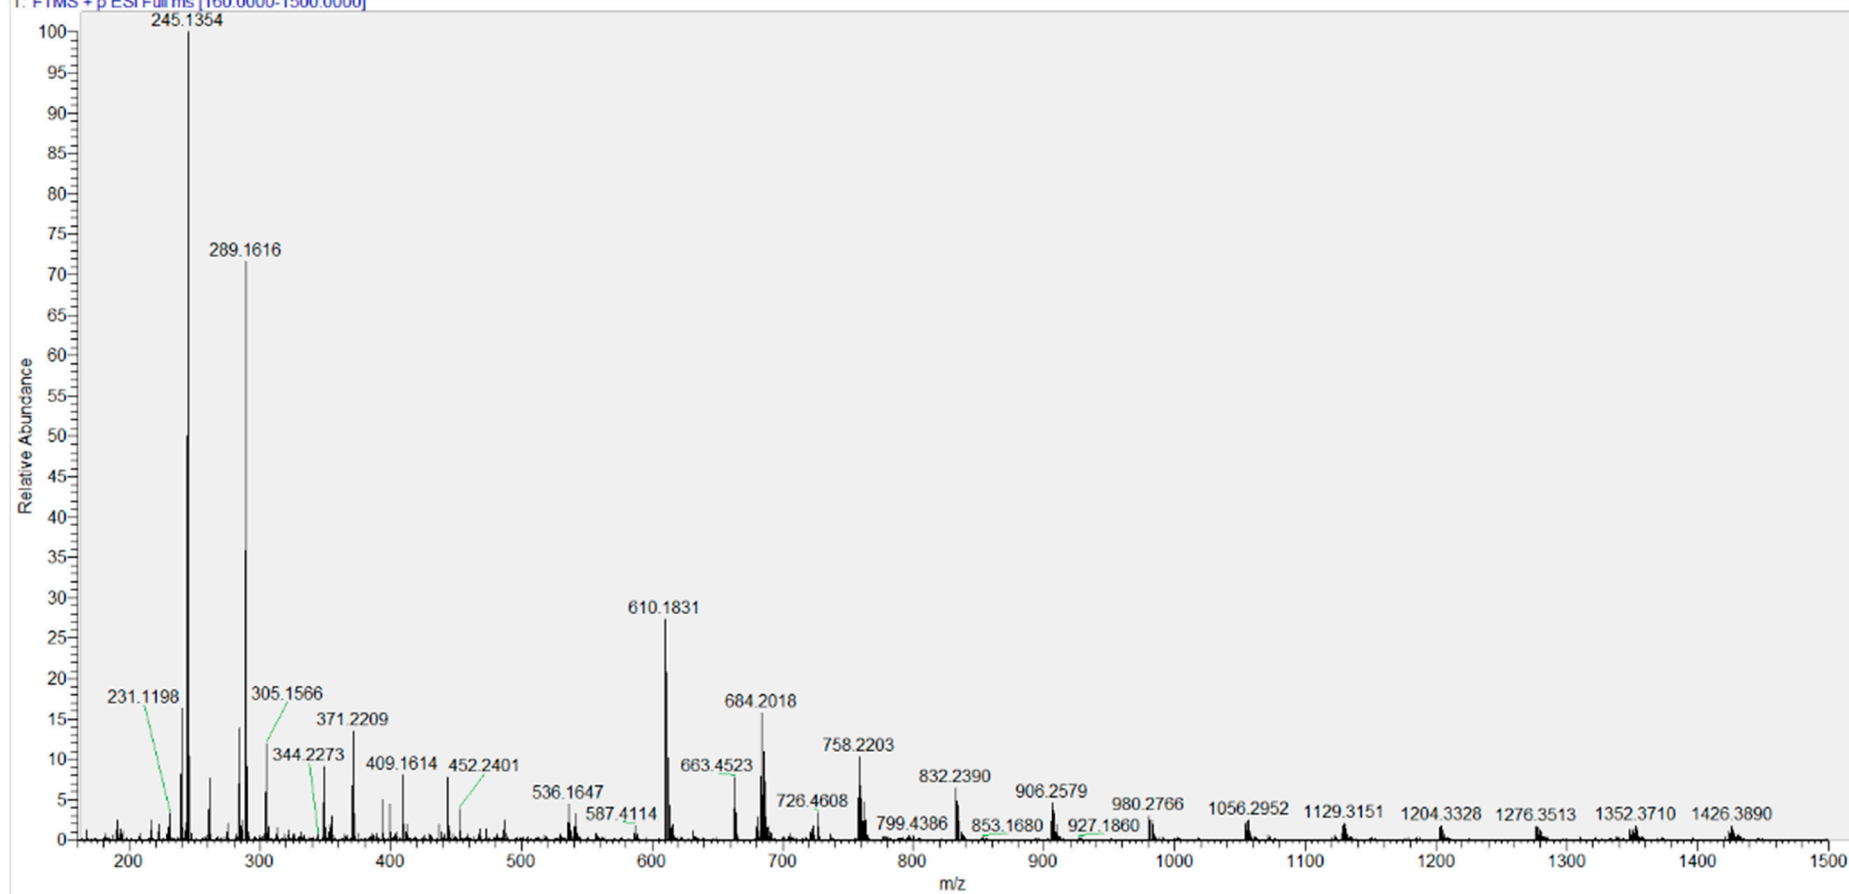

**Figure S20.** Positive-ion mode HR-ESI-MS spectrum of 3-oxo-gitoxigenin (**compound 2**)

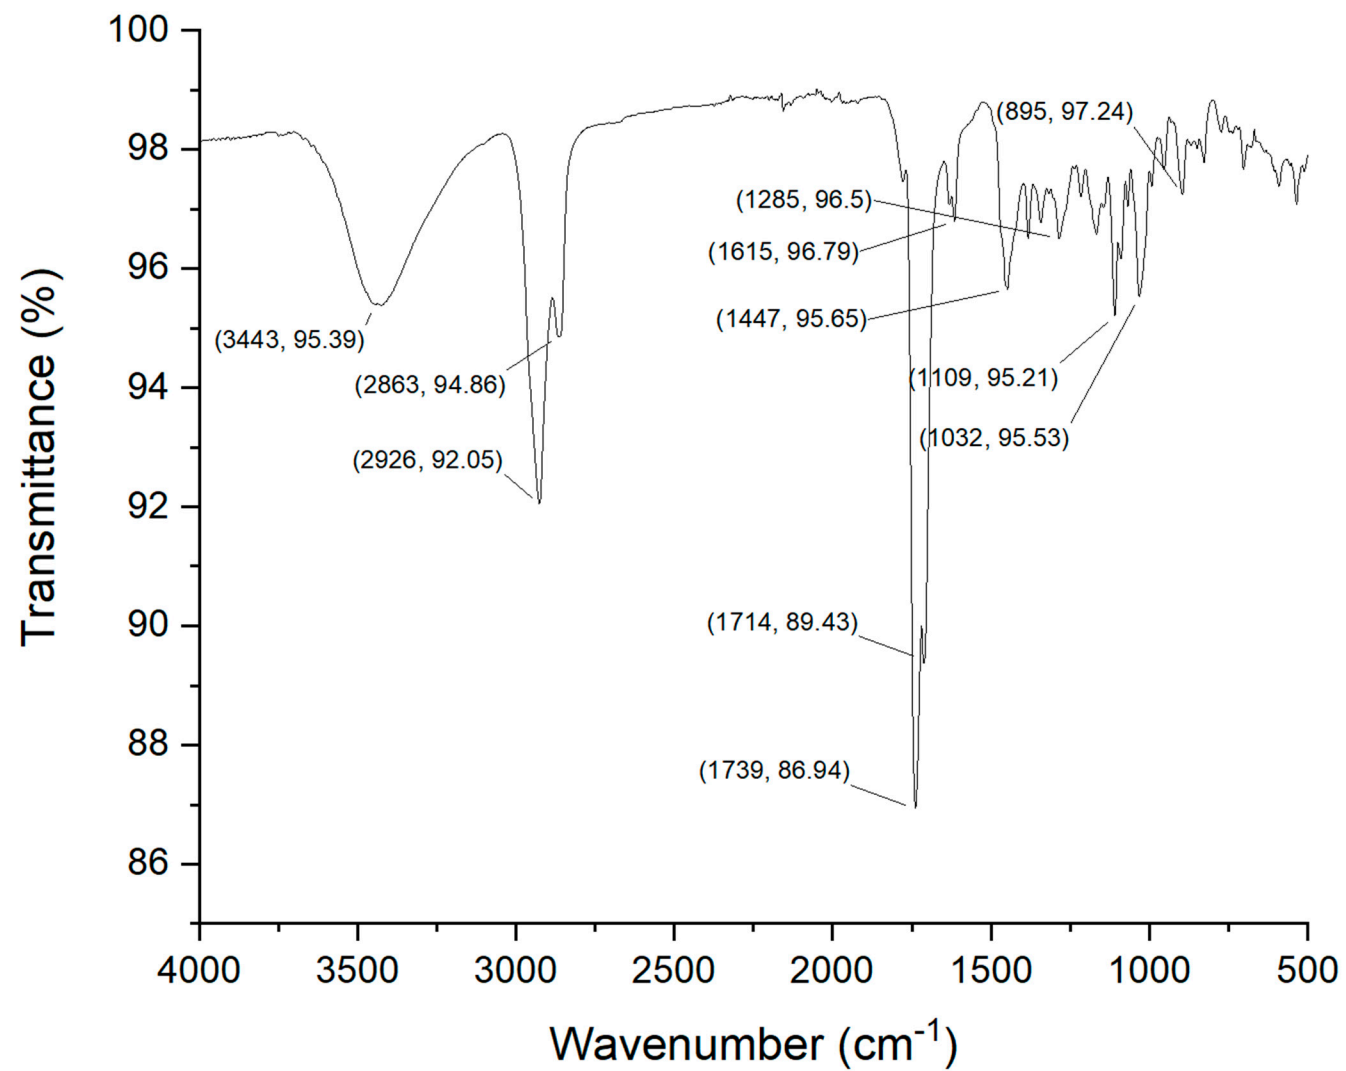

**Figure S21.** FT-IR Spectrum of 3-oxo-gitoxigenin (**compound 2**)

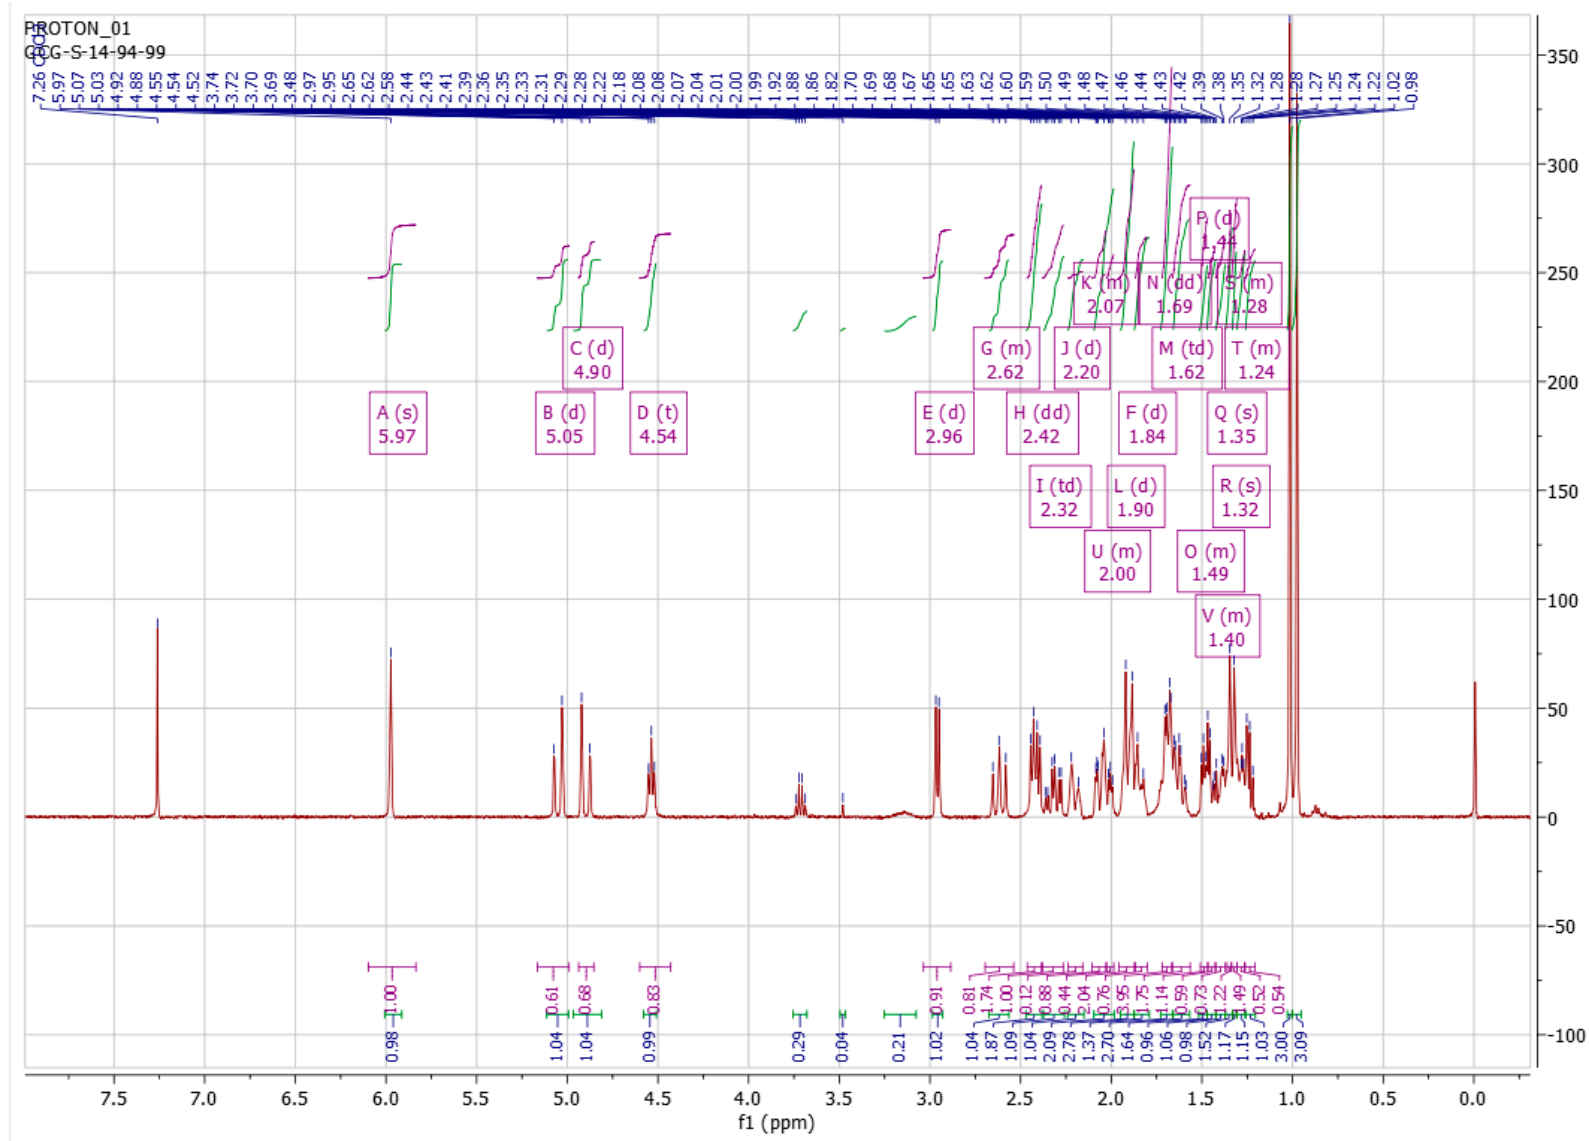

**Figure S22.**  $^1\text{H}$  NMR Spectrum of 3-oxo-gitoxigenin (**compound 2**)

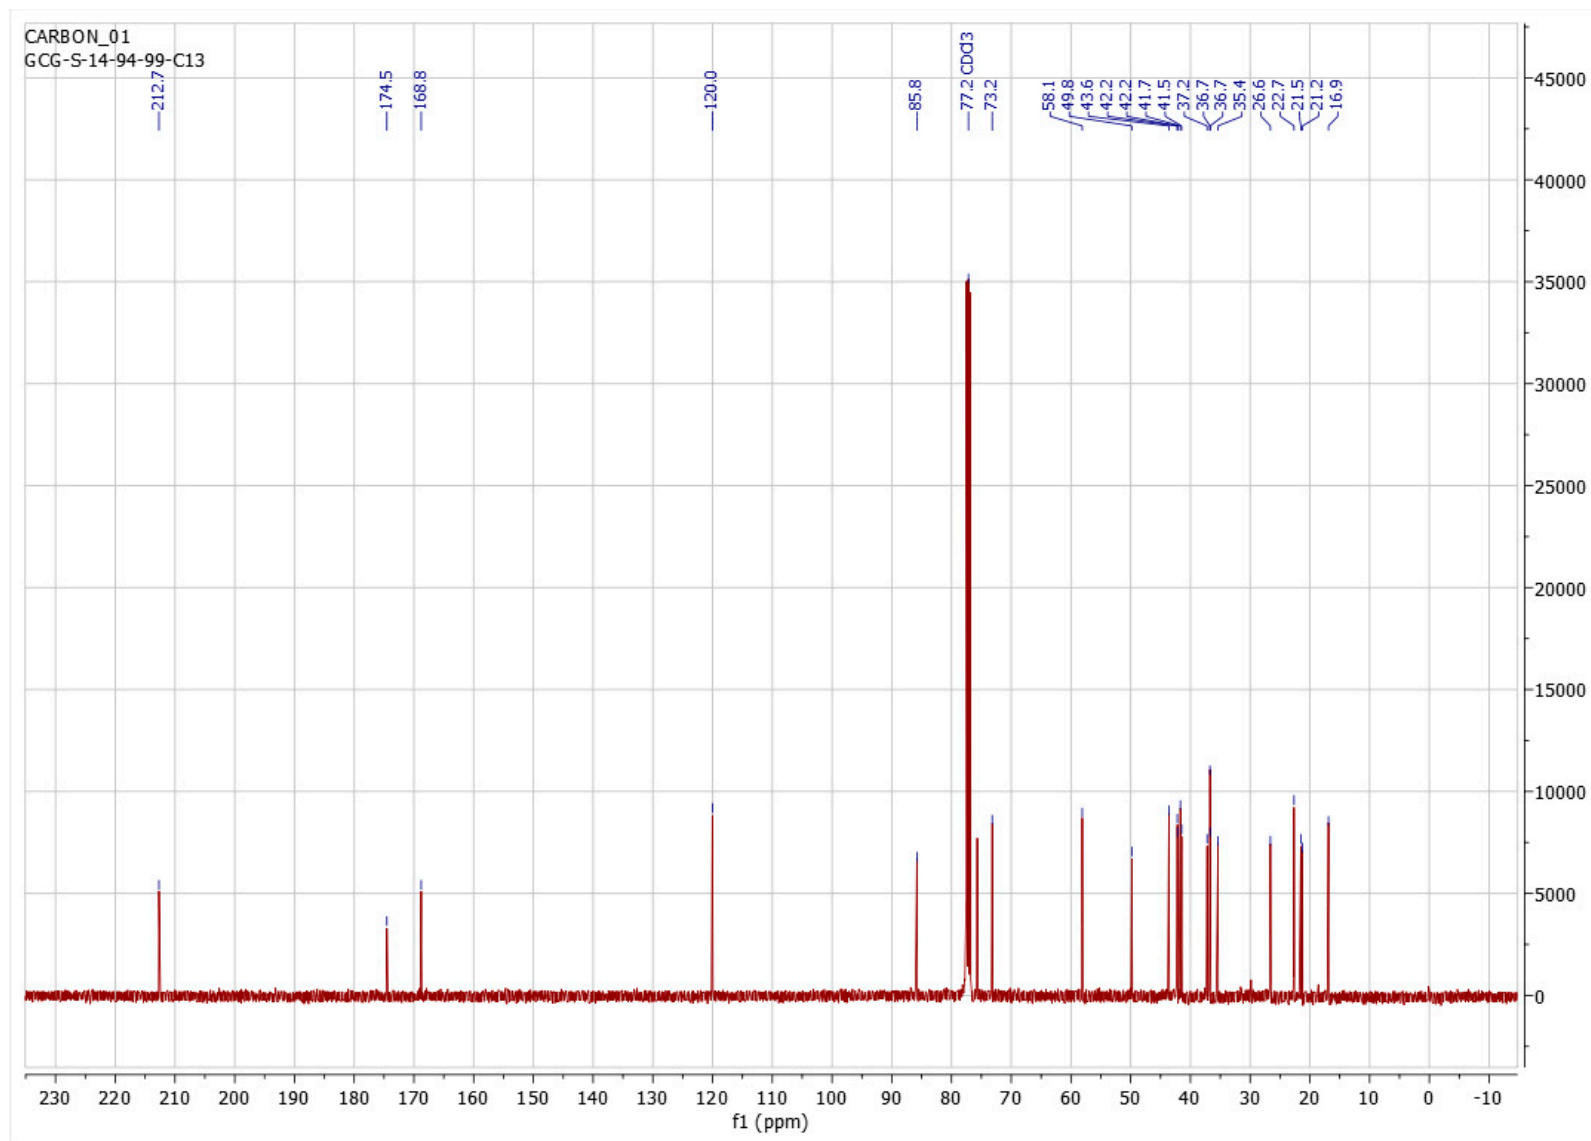

**Figure S23.**  $^{13}\text{C}$  NMR Spectrum of 3-oxo-gitoxigenin (compound 2)

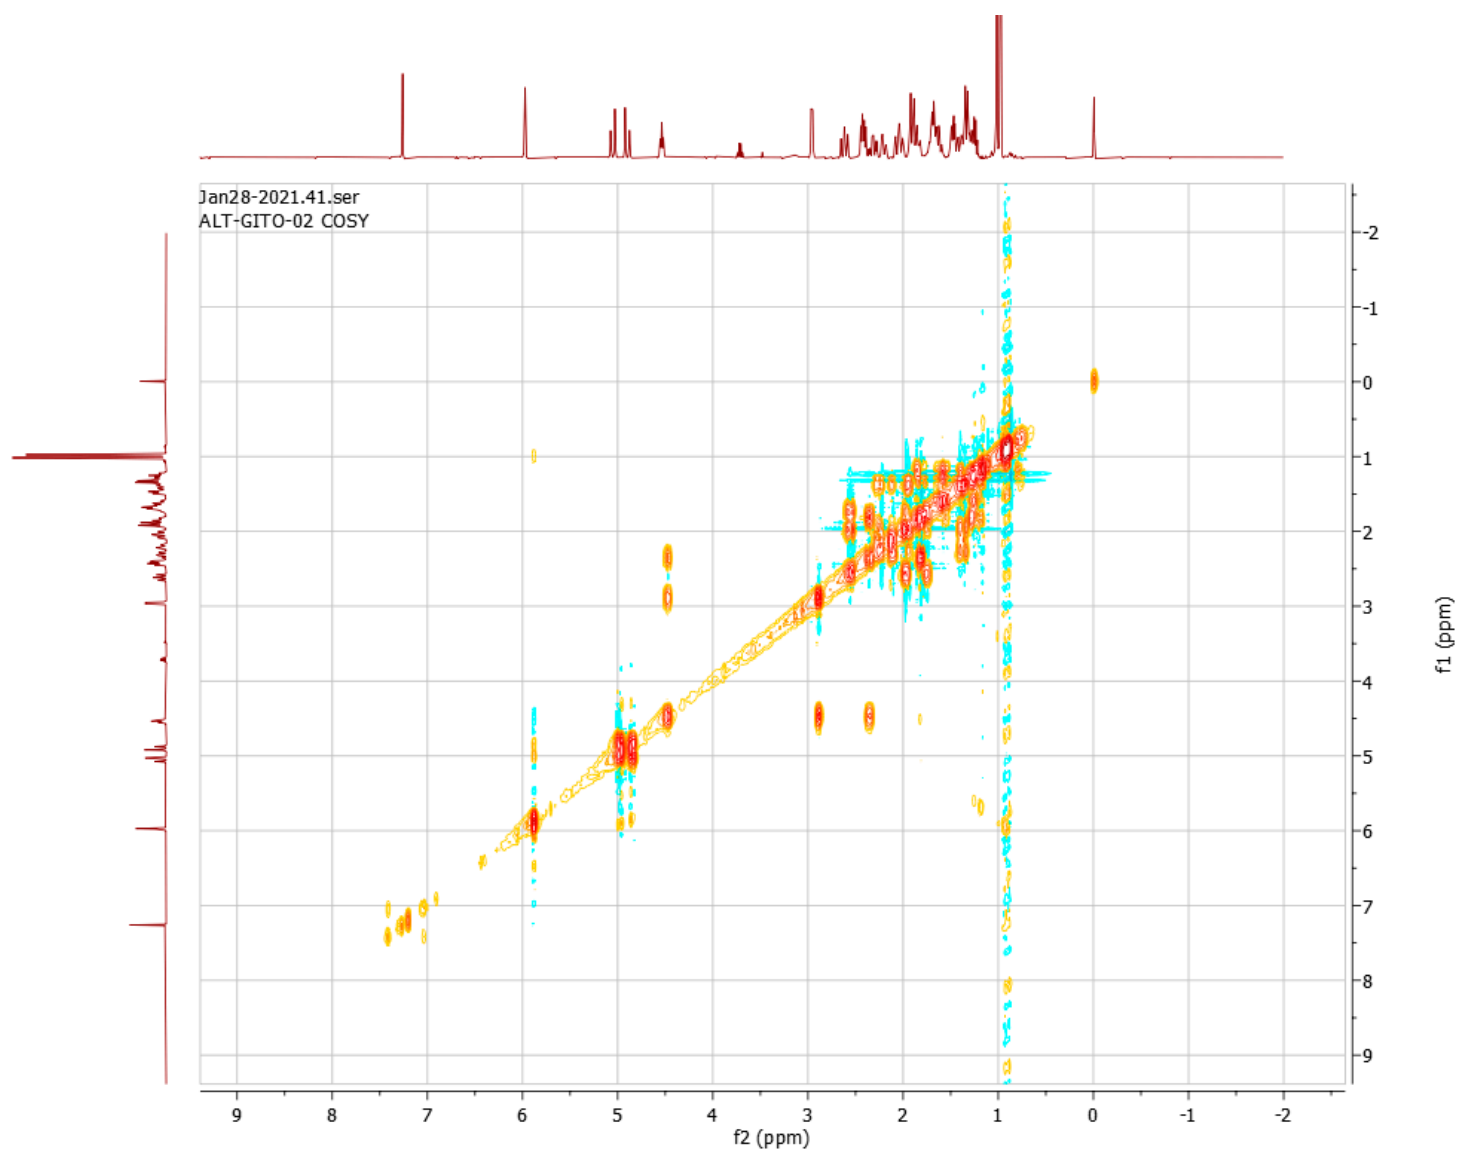

**Figure S24.** COSY Spectrum of 3-oxo-gitoxigenin (compound 2)



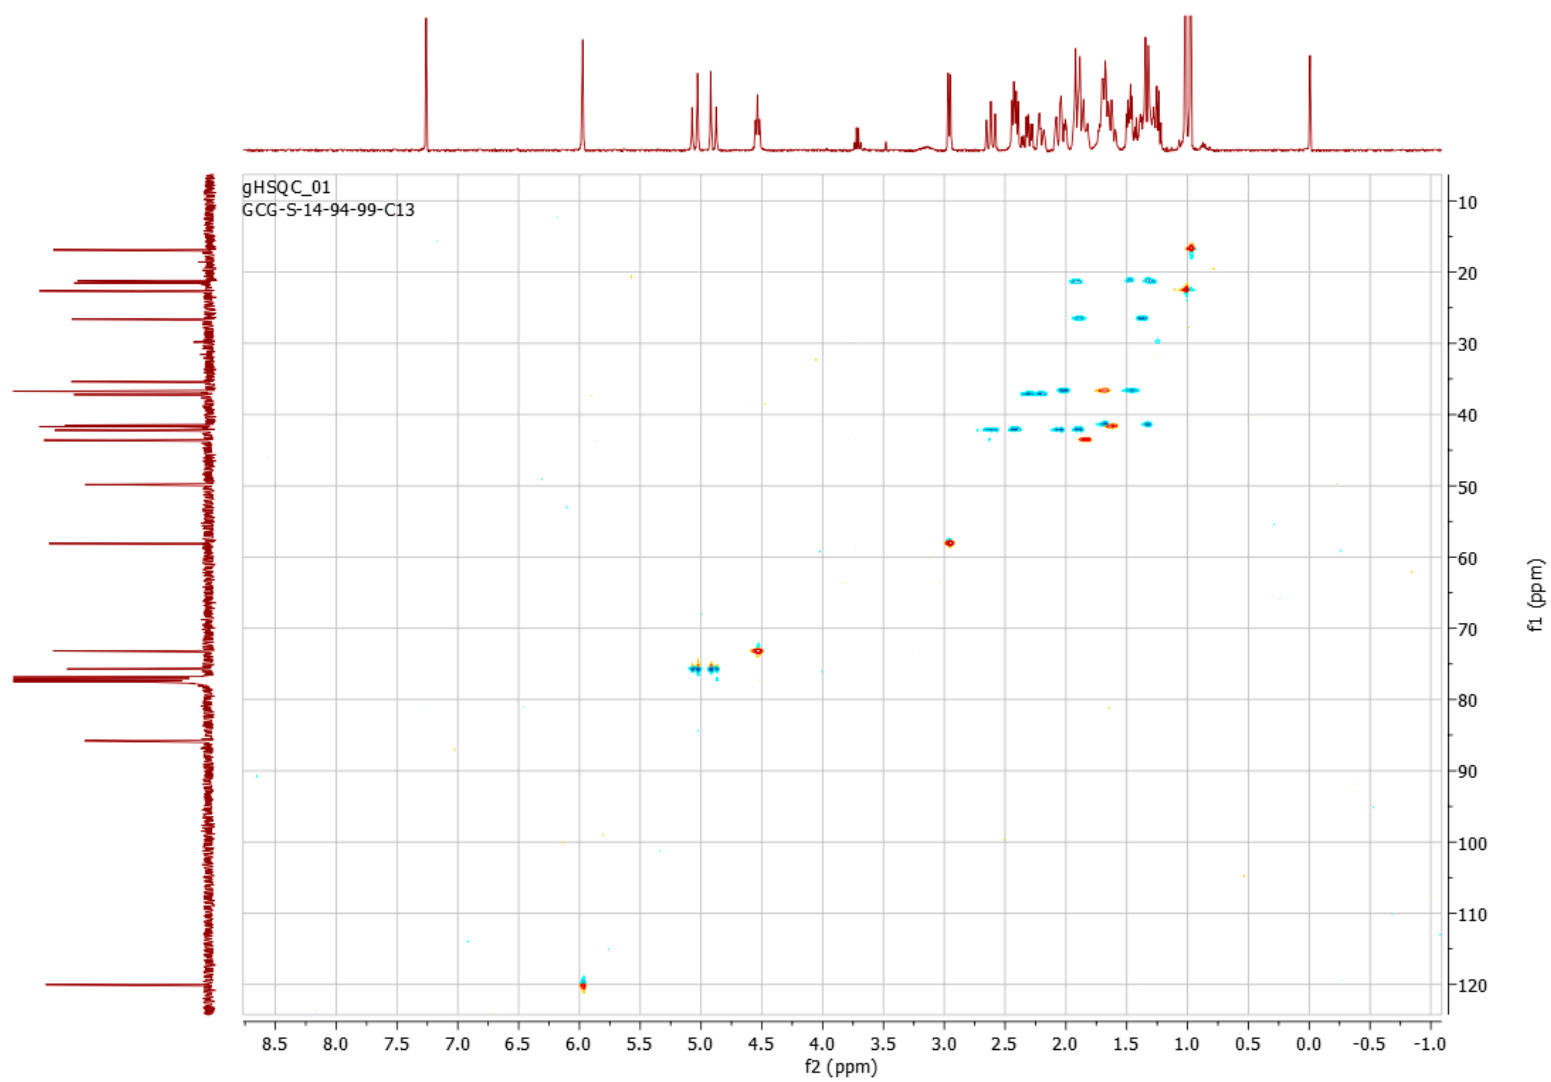

**Figure S25.** HSQC Spectrum of 3-oxo-gitoxigenin (**compound 2**)

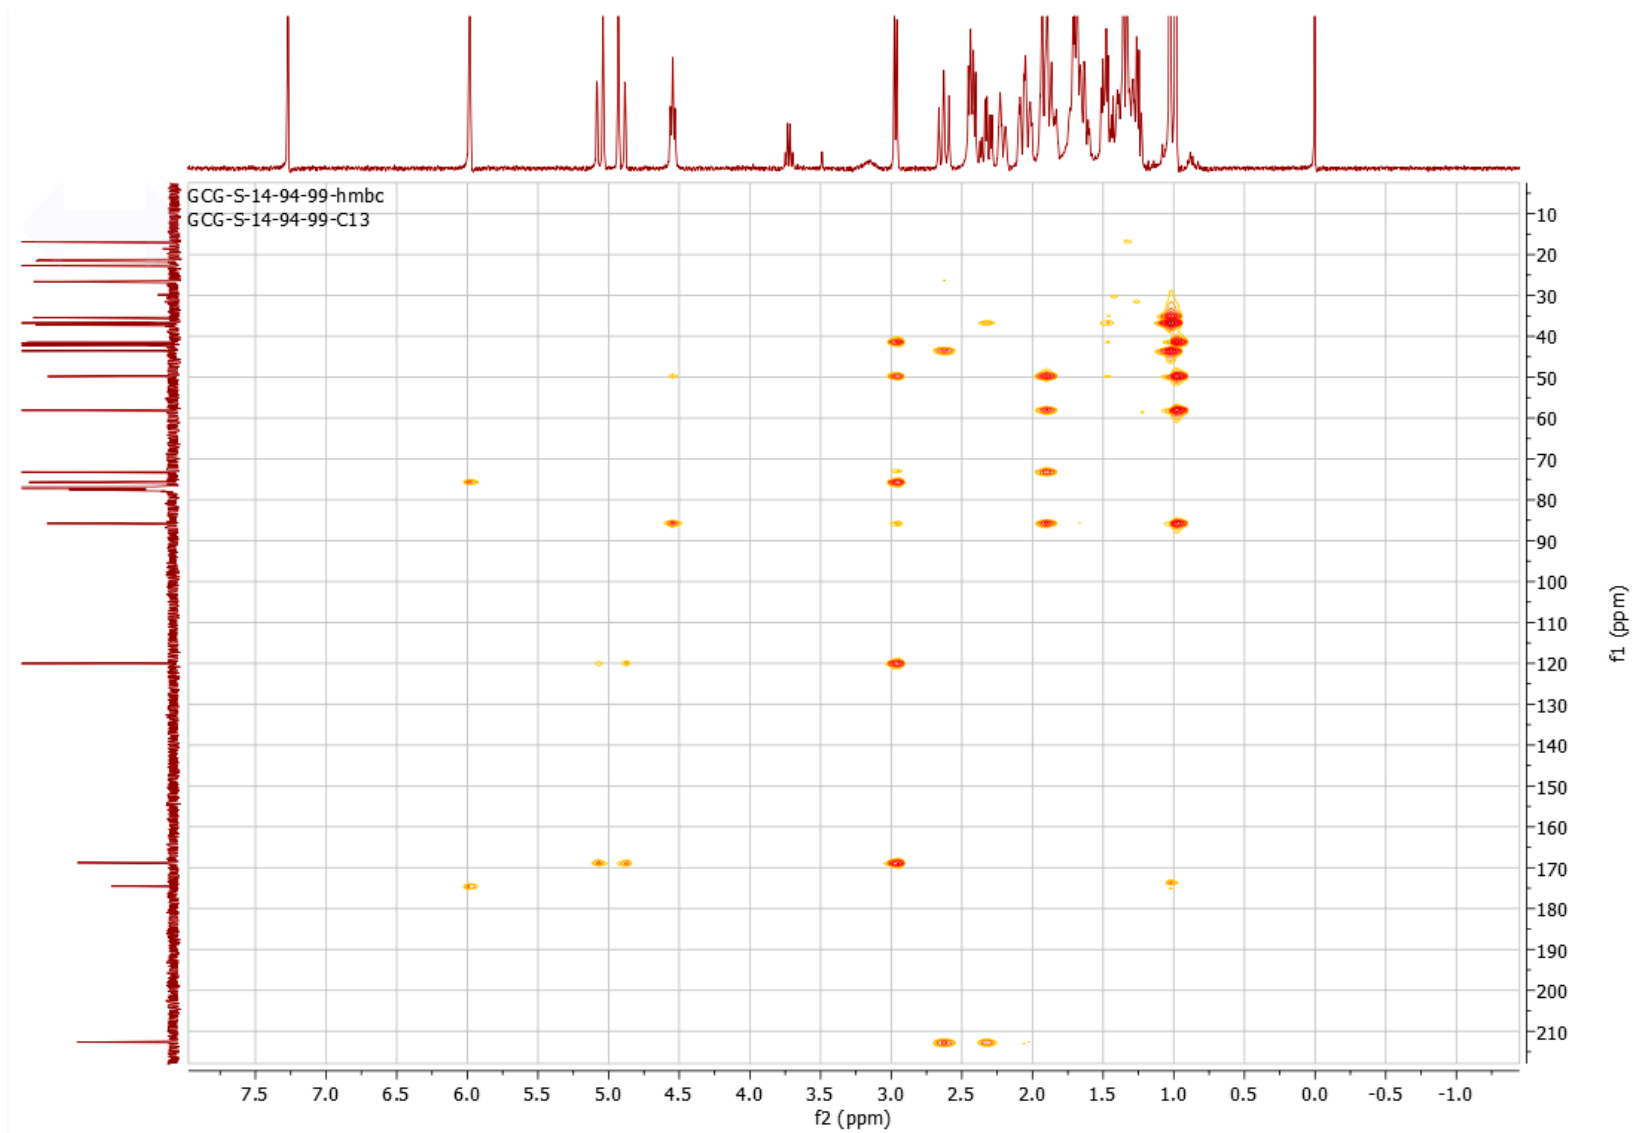

**Figure S26.** HMBC Spectrum of 3-oxo-gitoxigenin (**compound 2**)

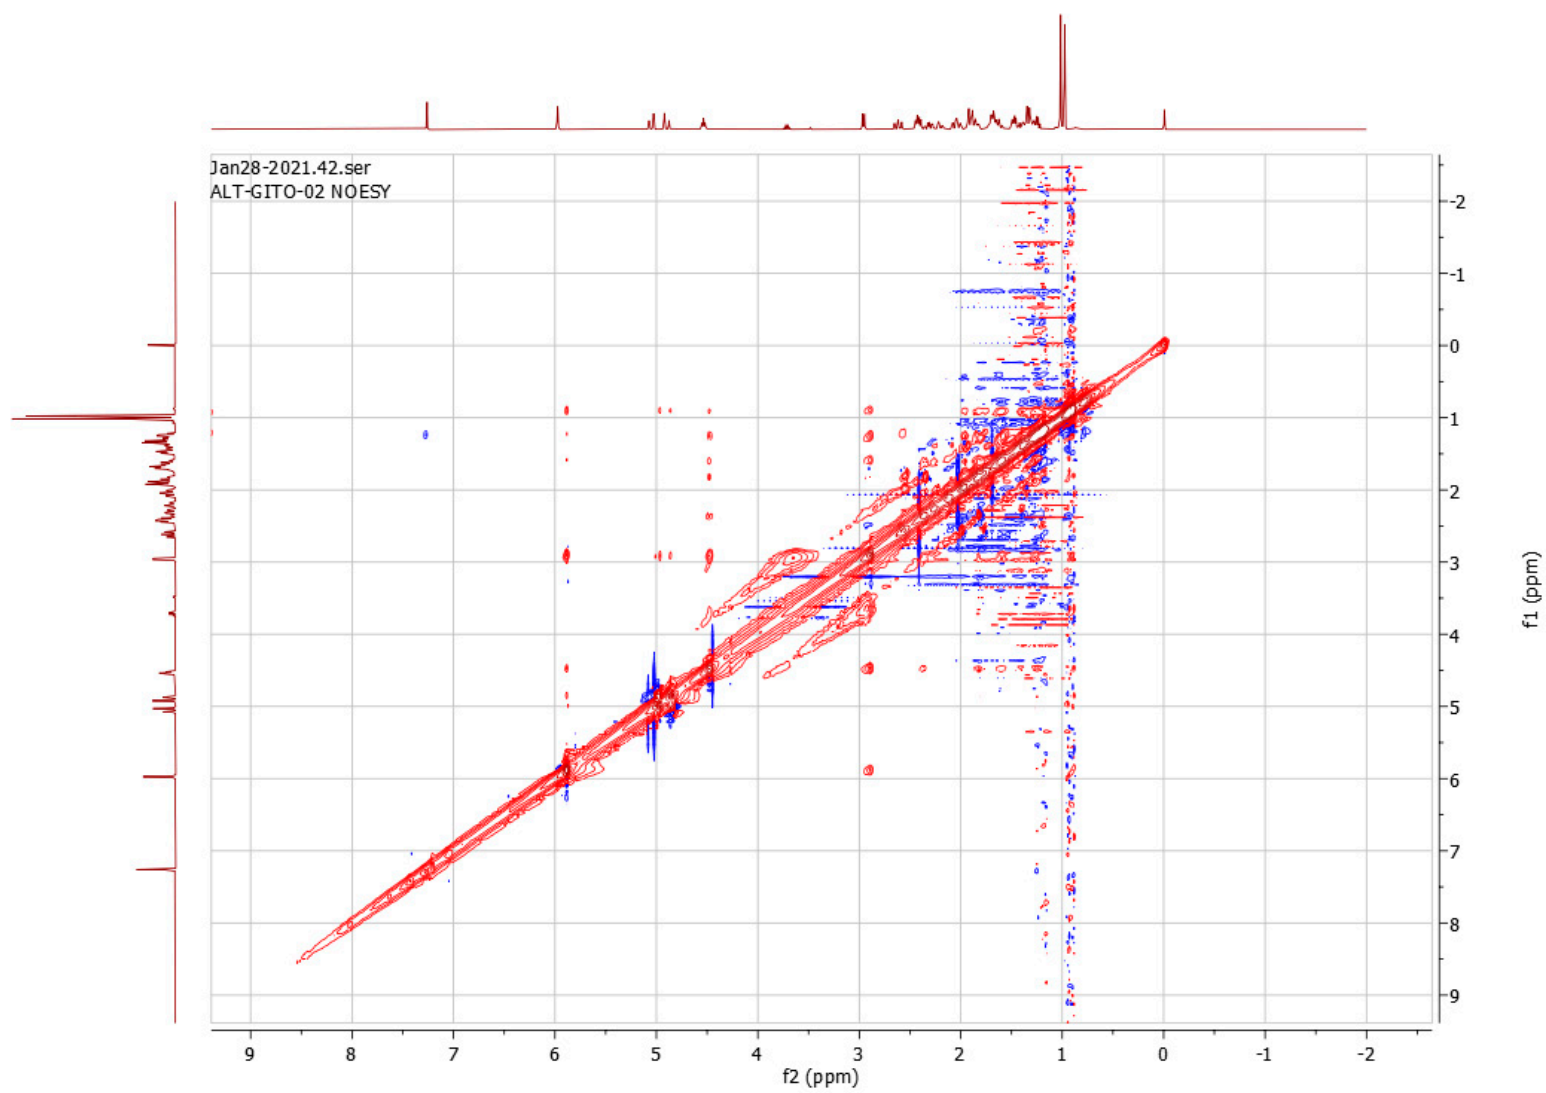

**Figure S27.** NOESY Spectrum of 3-oxo-gitoxigenin (**compound 2**)

Erdal Sample GITO-09 negative - 13-12-2020 #71 RT: 0.33 AV: 1 NL: 8.31E5  
T: FTMS - p ESI Full ms [160.0000-1500.0000]

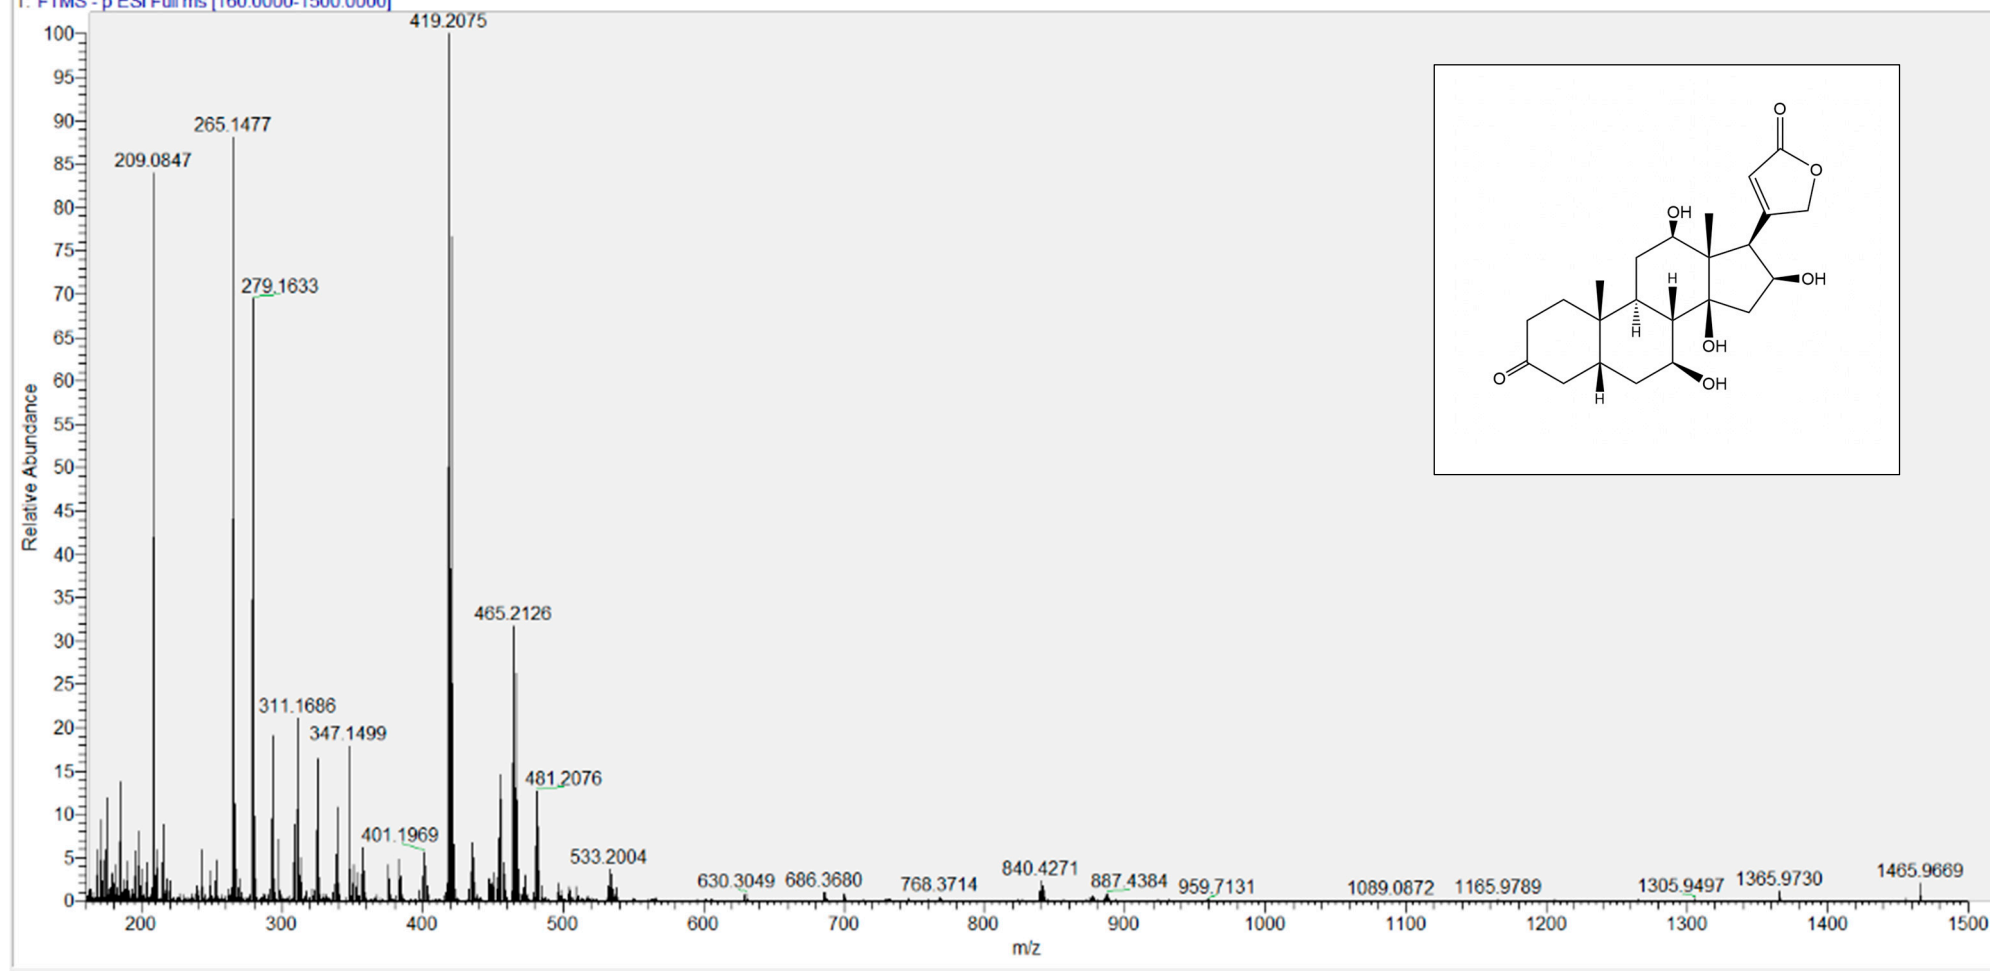

**Figure S28.** Negative-ion mode HR-ESI-MS spectrum of 7(β),12(β)-dihydroxy-3-oxo-gitoxigenin (compound 3)

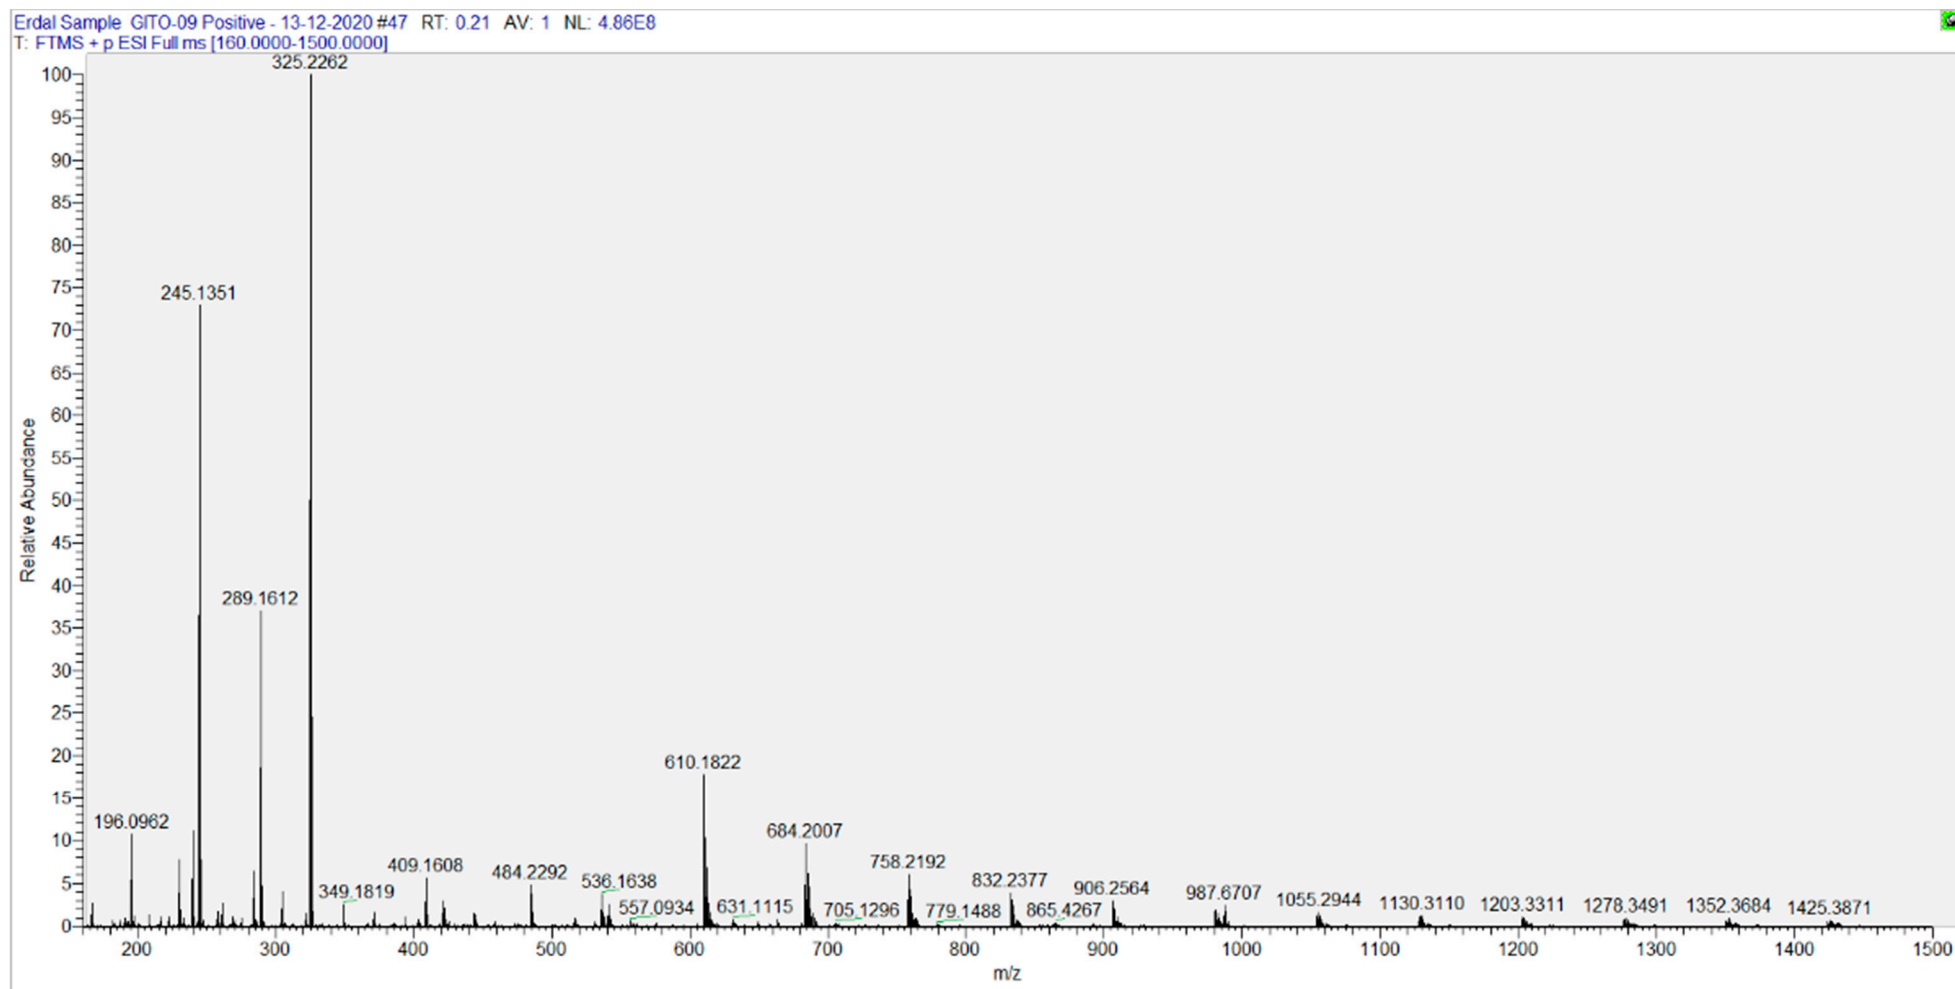

**Figure S29.** Positive-ion mode HR-ESI-MS spectrum of 7( $\beta$ ),12( $\beta$ )-dihydroxy-3-oxo-gitoxigenin (**compound 3**)

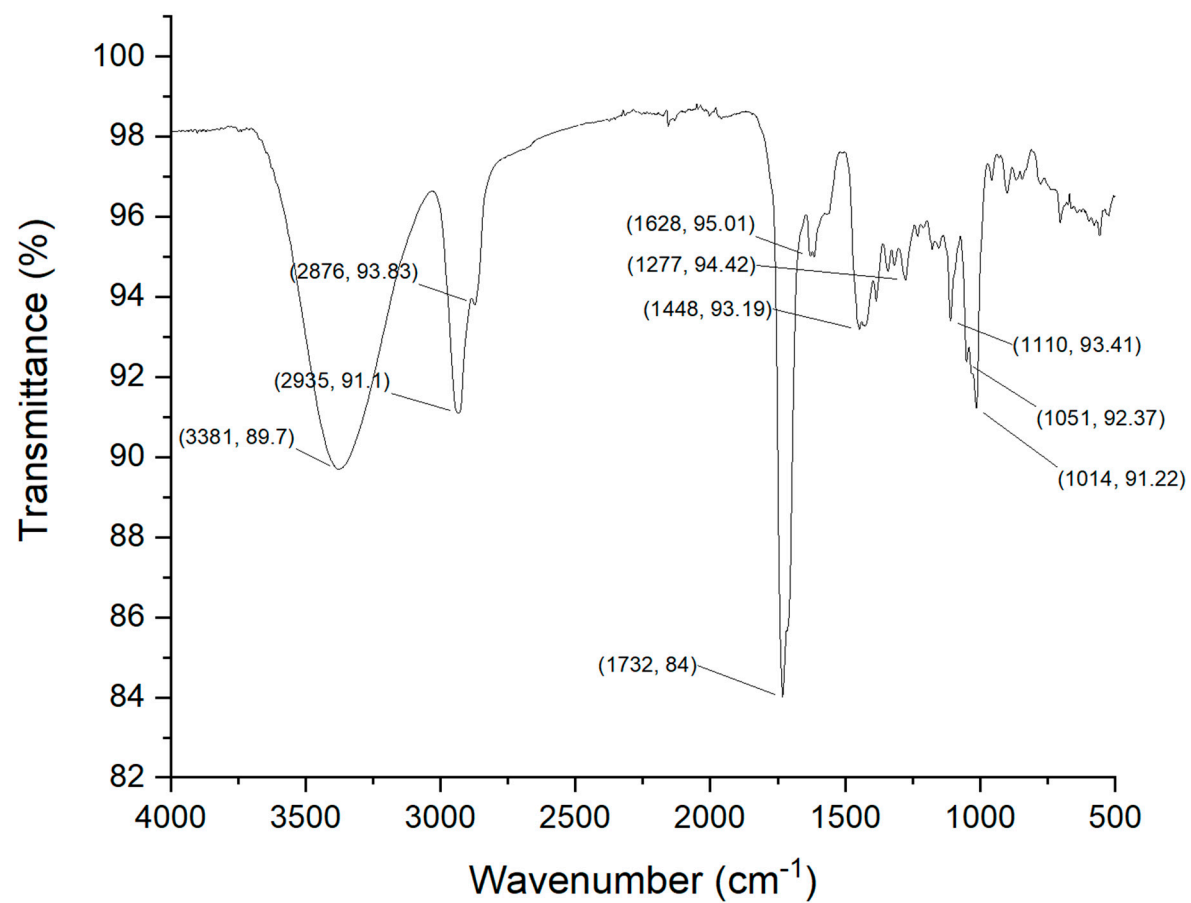

**Figure S30.** FT-IR Spectrum of 7(β),12(β)-dihydroxy-3-oxo-gitoxigenin (**compound 3**)

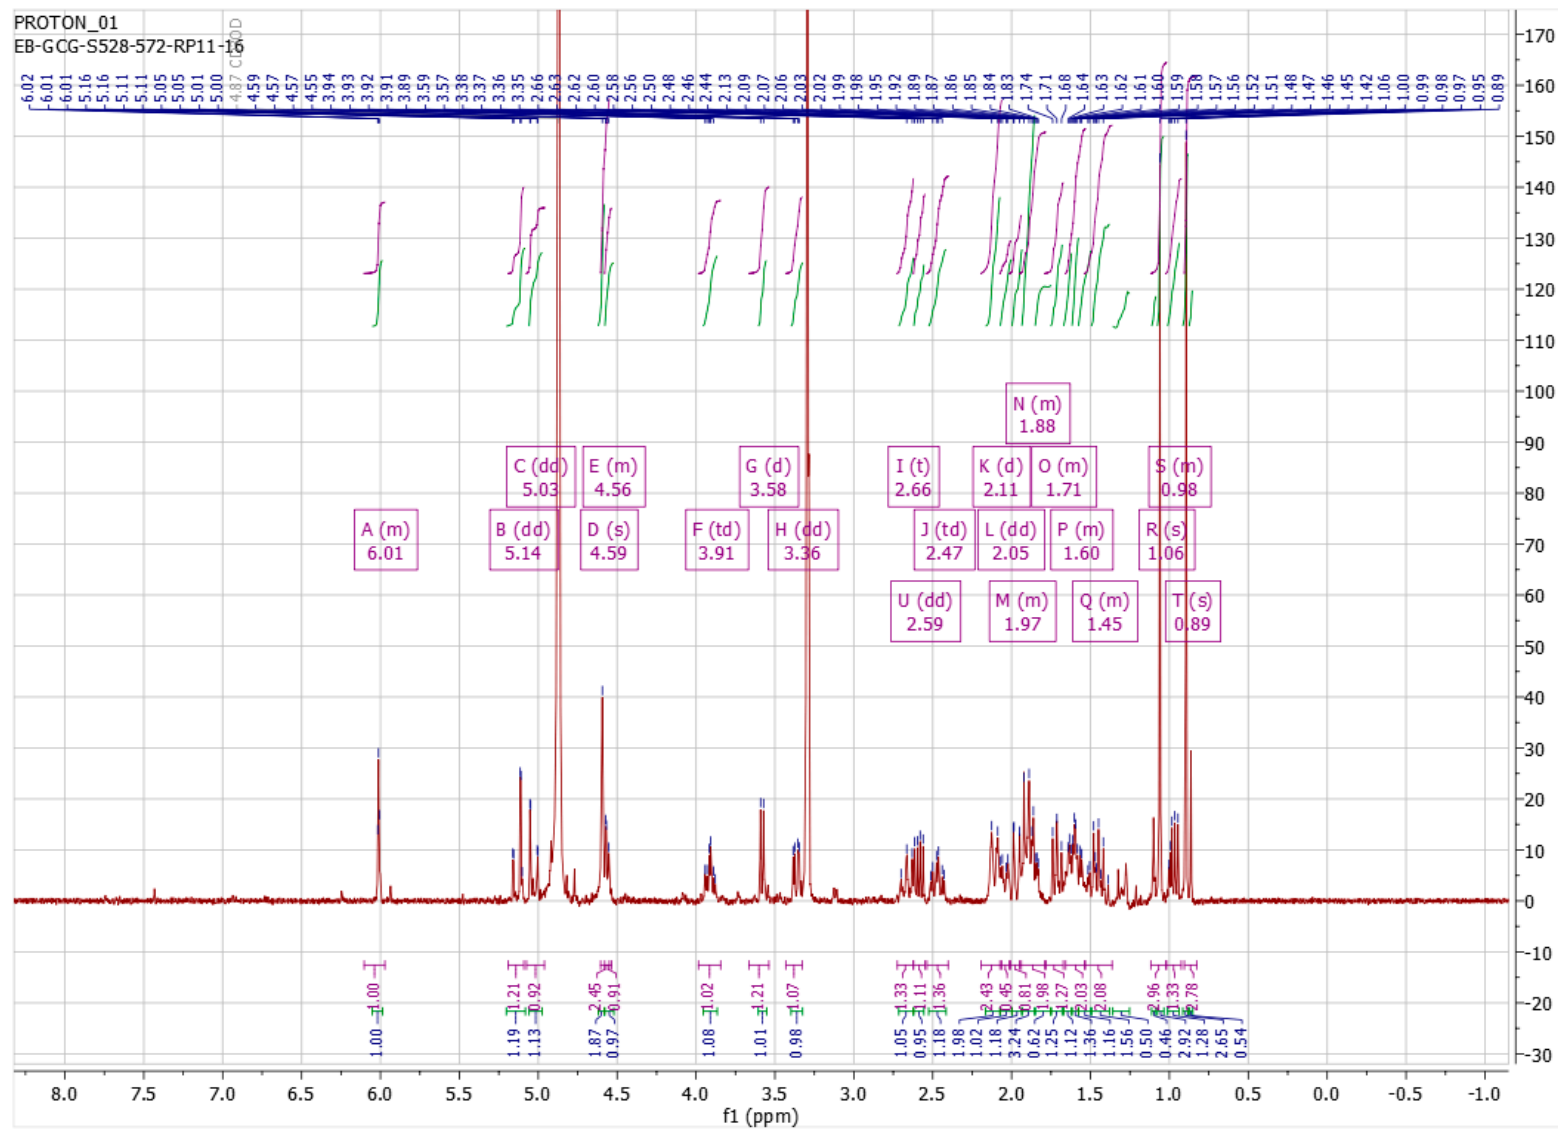

**Figure S31.**  $^1\text{H}$  NMR Spectrum of 7( $\beta$ ),12( $\beta$ )-dihydroxy-3-oxo-gitoxigenin (**compound 3**)

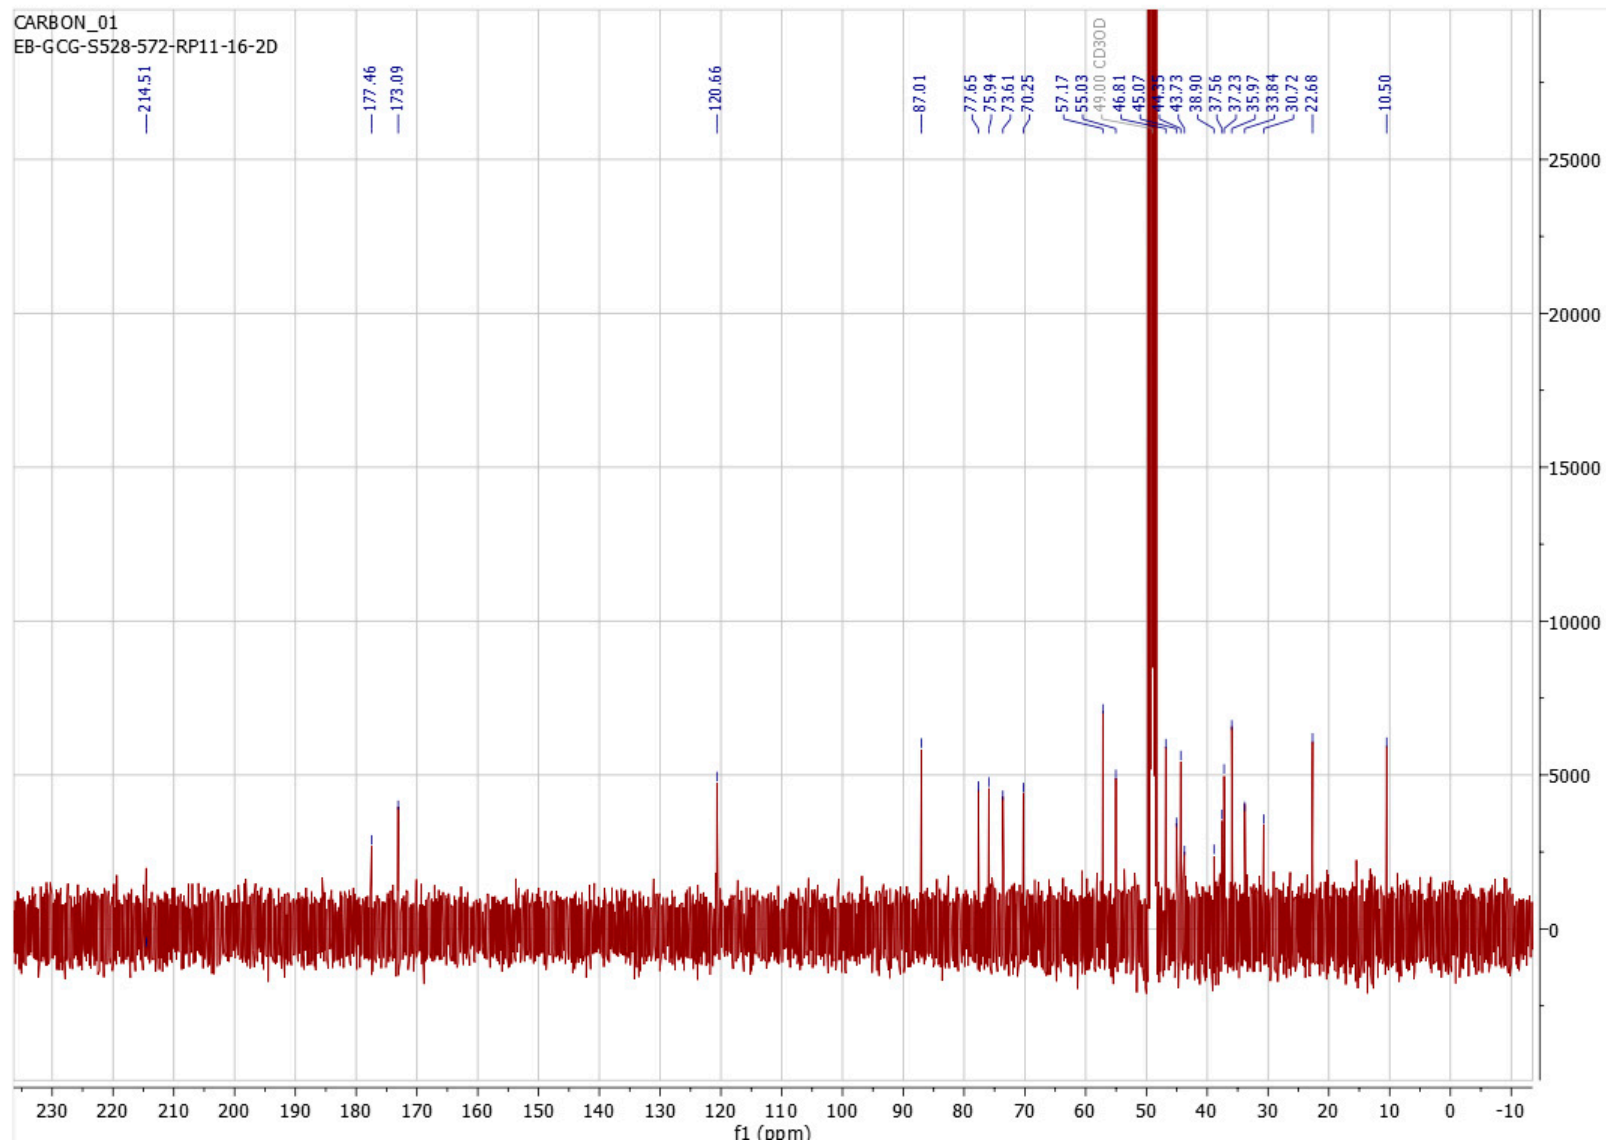

**Figure S32.**  $^{13}\text{C}$  NMR Spectrum of 7( $\beta$ ),12( $\beta$ )-dihydroxy-3-oxo-gitoxigenin (**compound 3**)





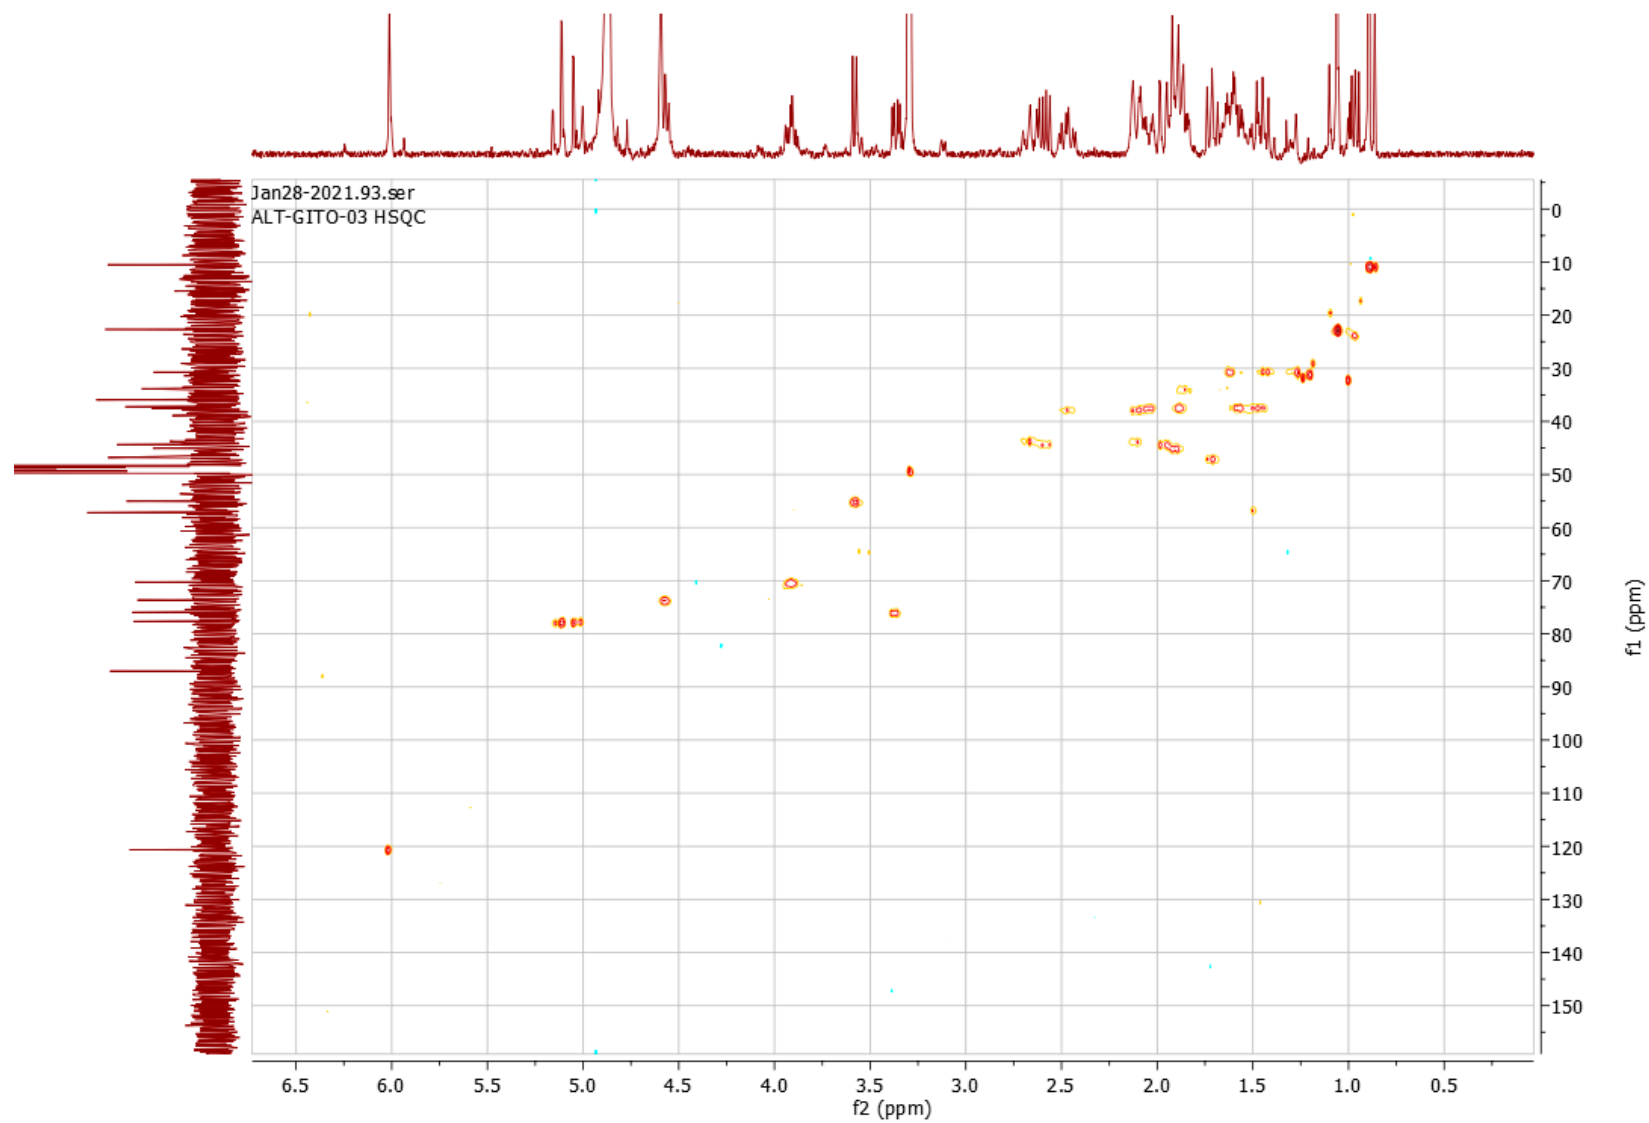

**Figure S34.** HSQC Spectrum of 7( $\beta$ ),12( $\beta$ )-dihydroxy-3-oxo-gitoxigenin (**compound 3**)

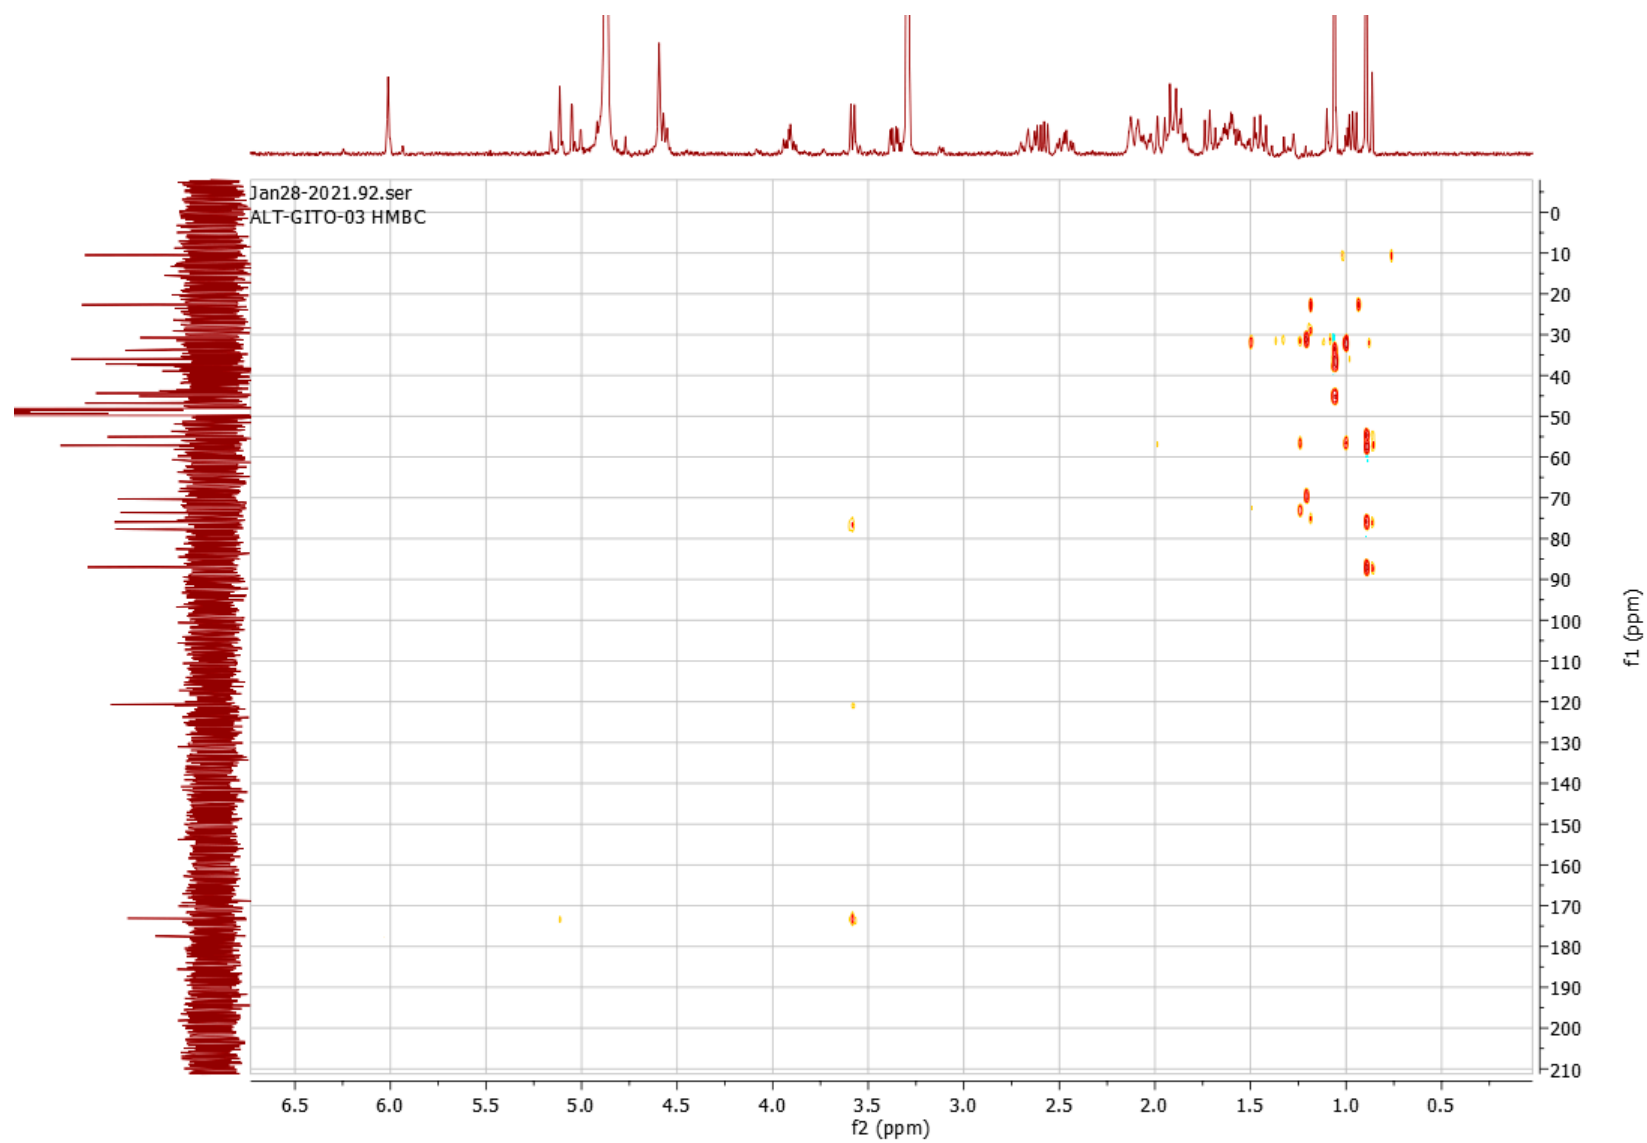

**Figure S35.** HMBC Spectrum of 7( $\beta$ ),12( $\beta$ )-dihydroxy-3-oxo-gitoxigenin (**compound 3**)

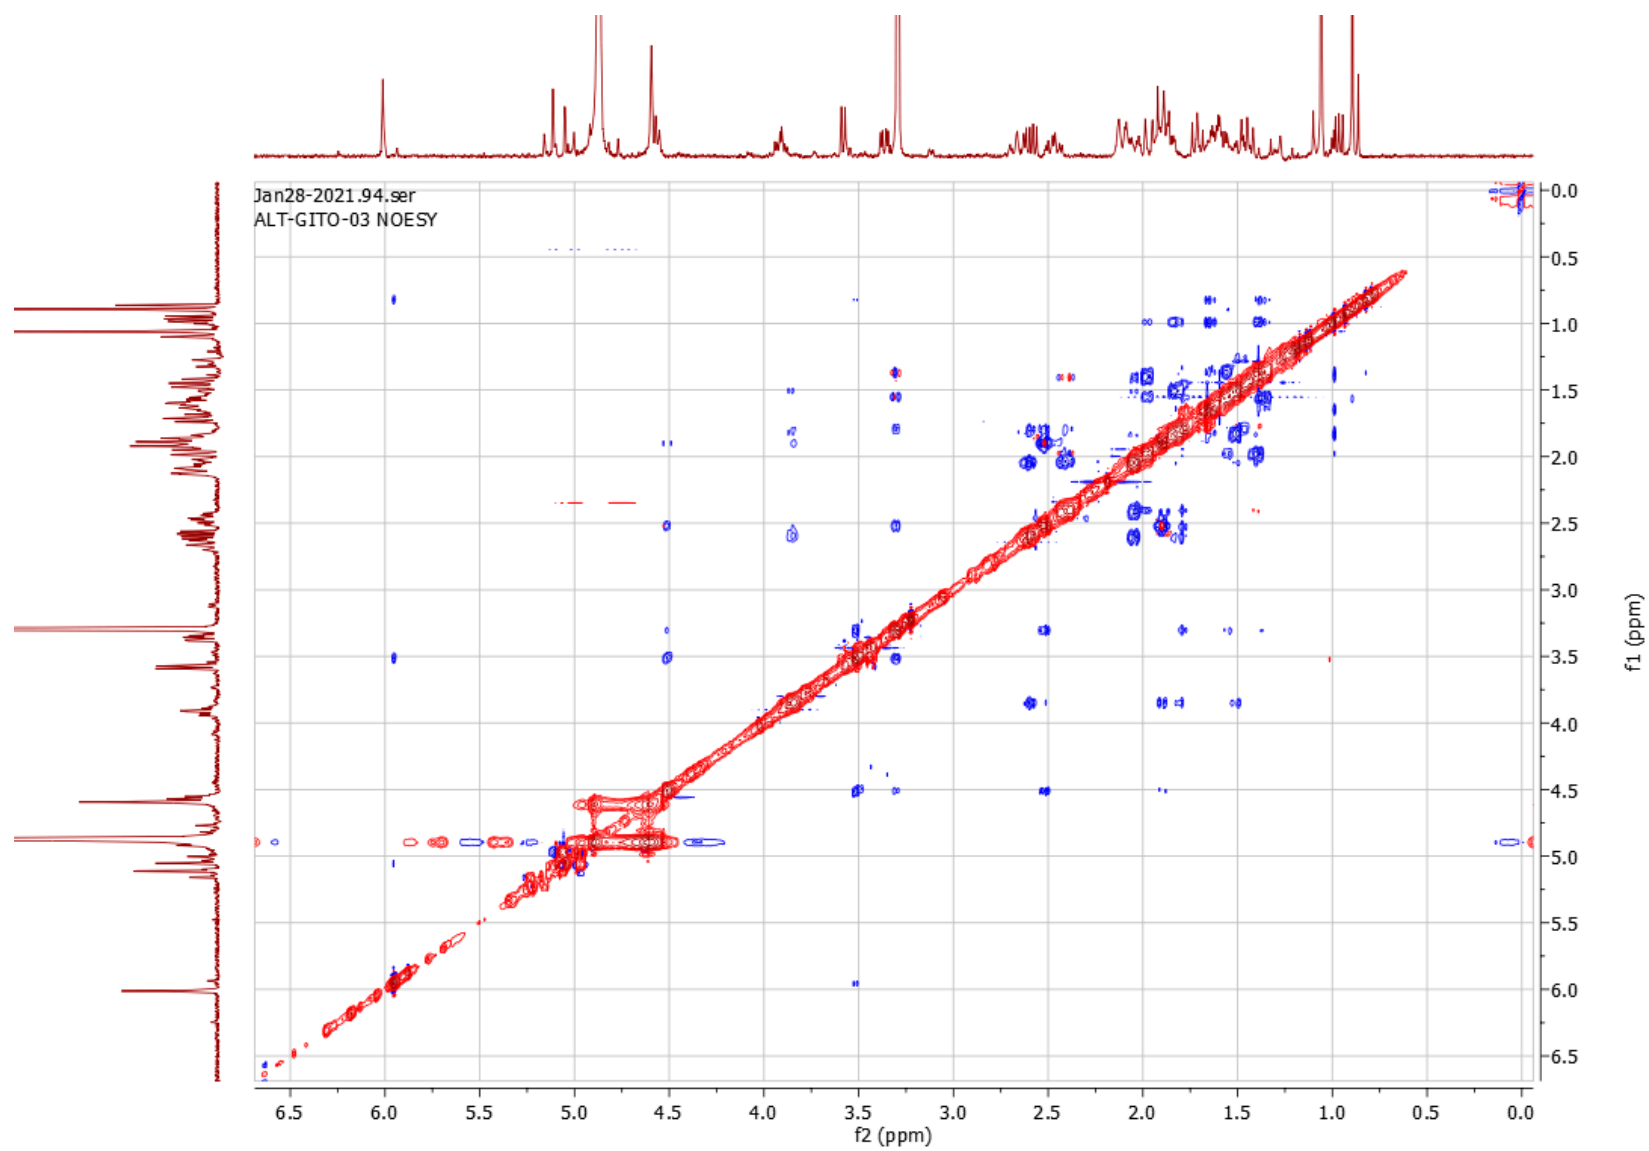

**Figure S36.** NOESY Spectrum of 7( $\beta$ ),12( $\beta$ )-dihydroxy-3-oxo-gitoxigenin (**compound 3**)

Erdal Sample GITO-04 negative - 13-12-2020 #34 RT: 0.15 AV: 1 NL: 1.64E6  
T: FTMS - p ESI Full ms [160.0000-1500.0000]

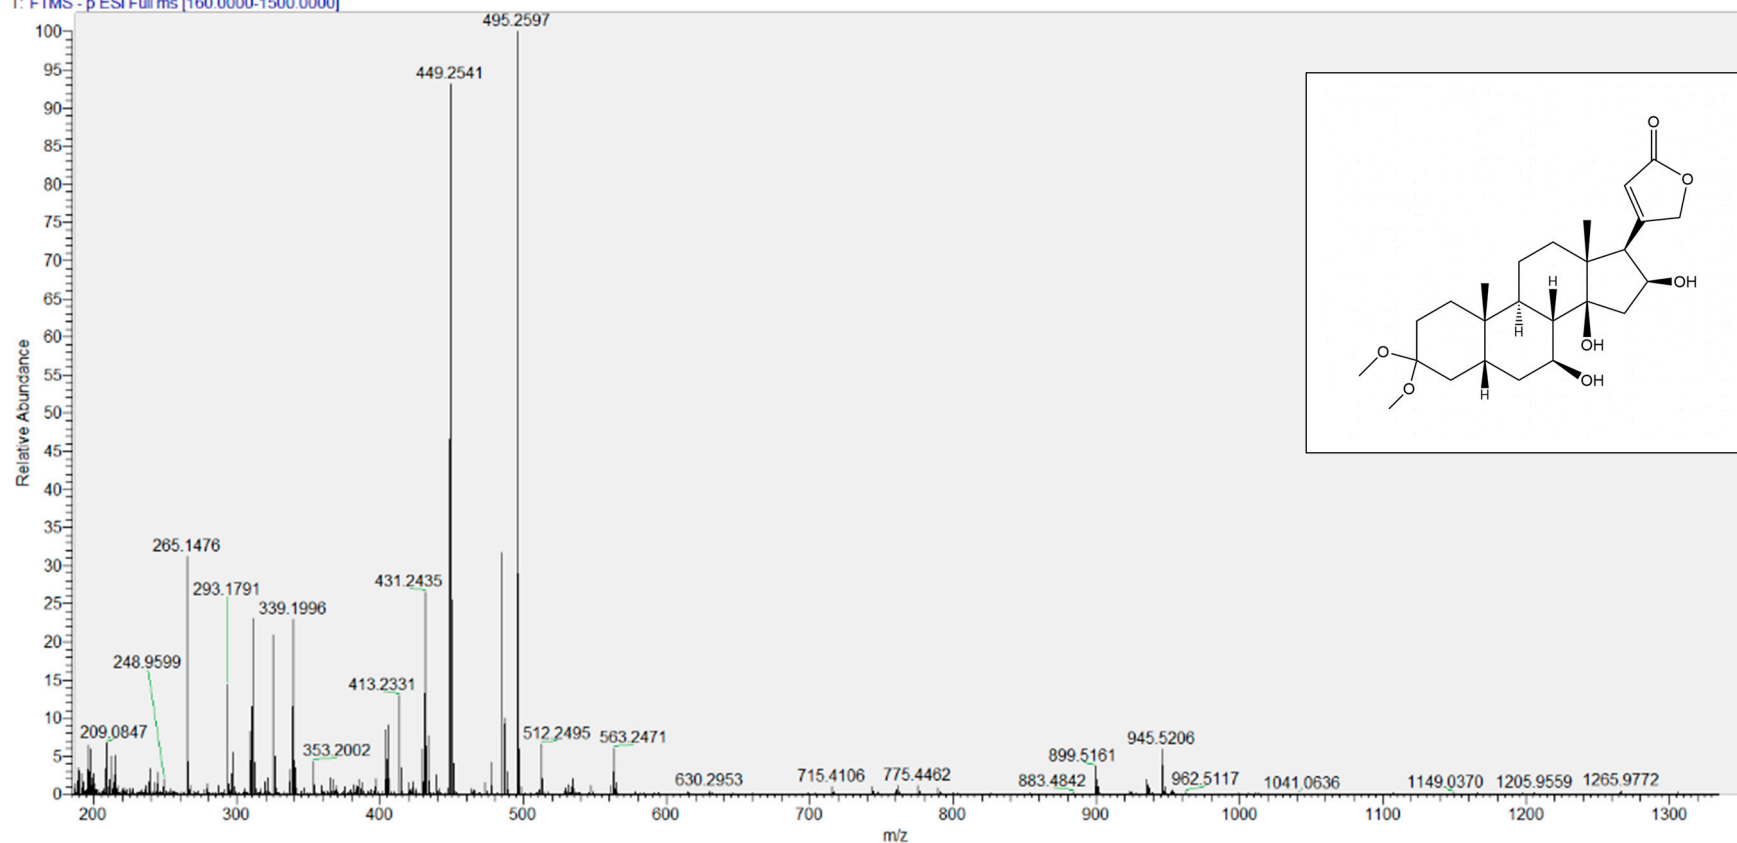

**Figure S37.** Negative-ion mode HR-ESI-MS spectrum of 3-dimethylacetal-7(β)-hydroxygitoxinin (**compound 4**)

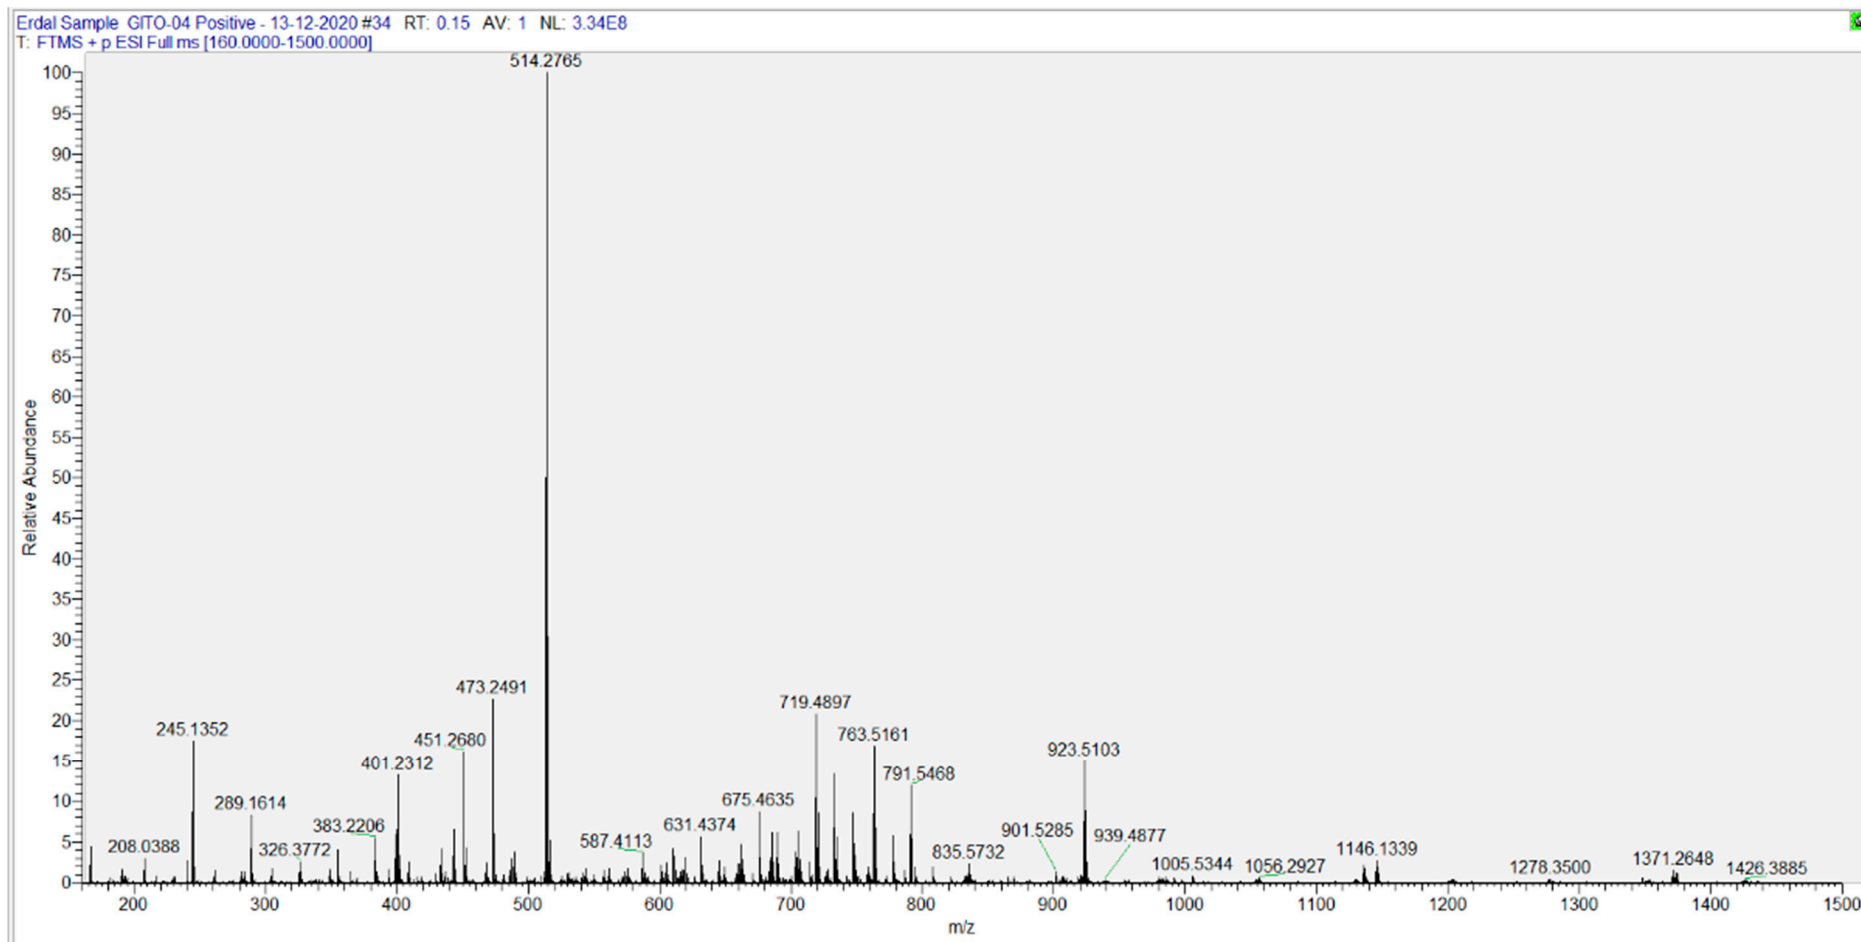

**Figure S38.** Positive-ion mode HR-ESI-MS spectrum of 3-dimethylacetal-7( $\beta$ )-hydroxygitoxigenin (**compound 4**)

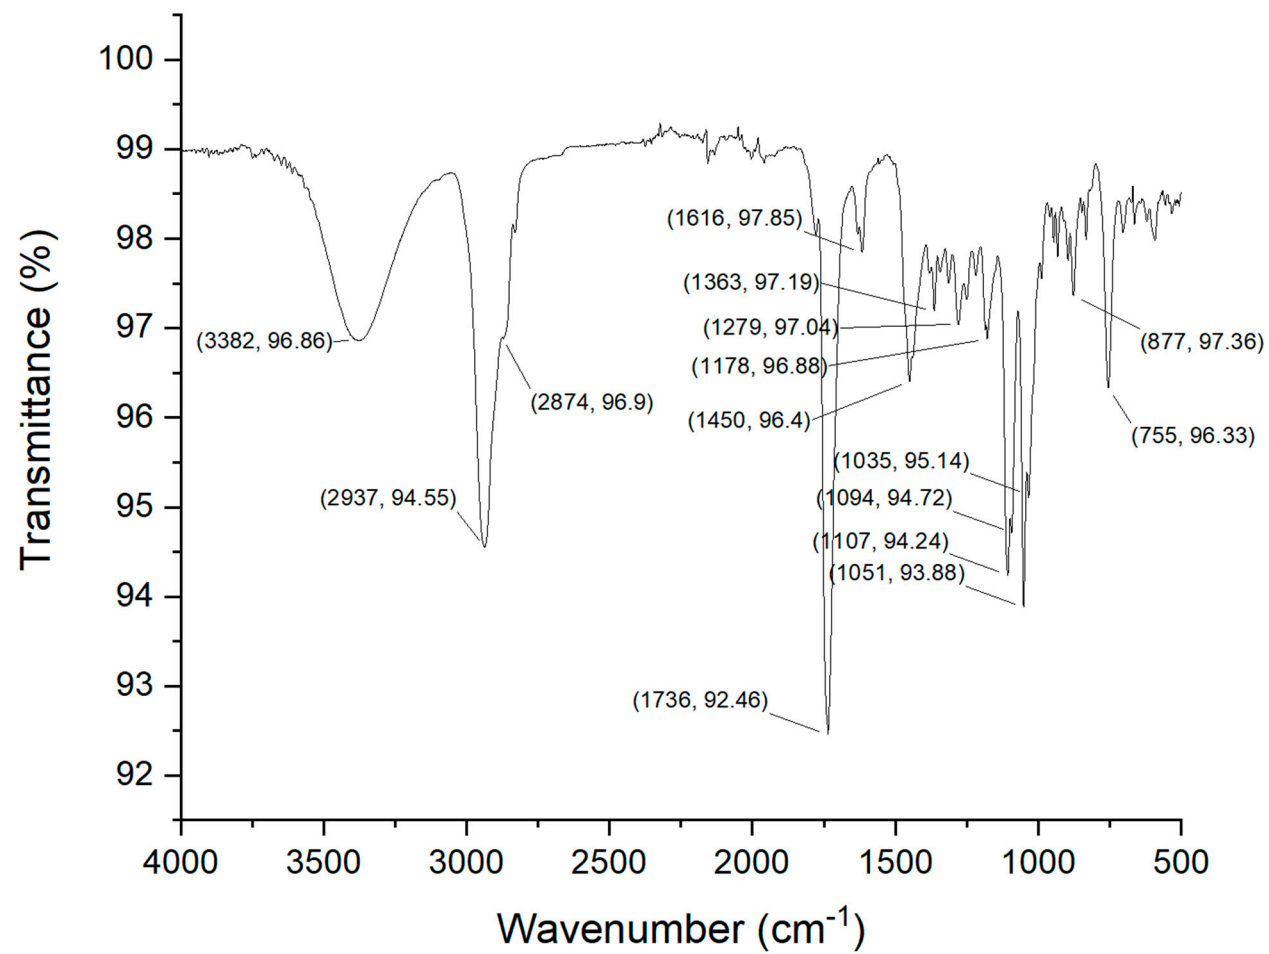

**Figure S39.** FT-IR spectrum of 3-dimethylacetal-7( $\beta$ )-hydroxygitoxigenin (**compound 4**)

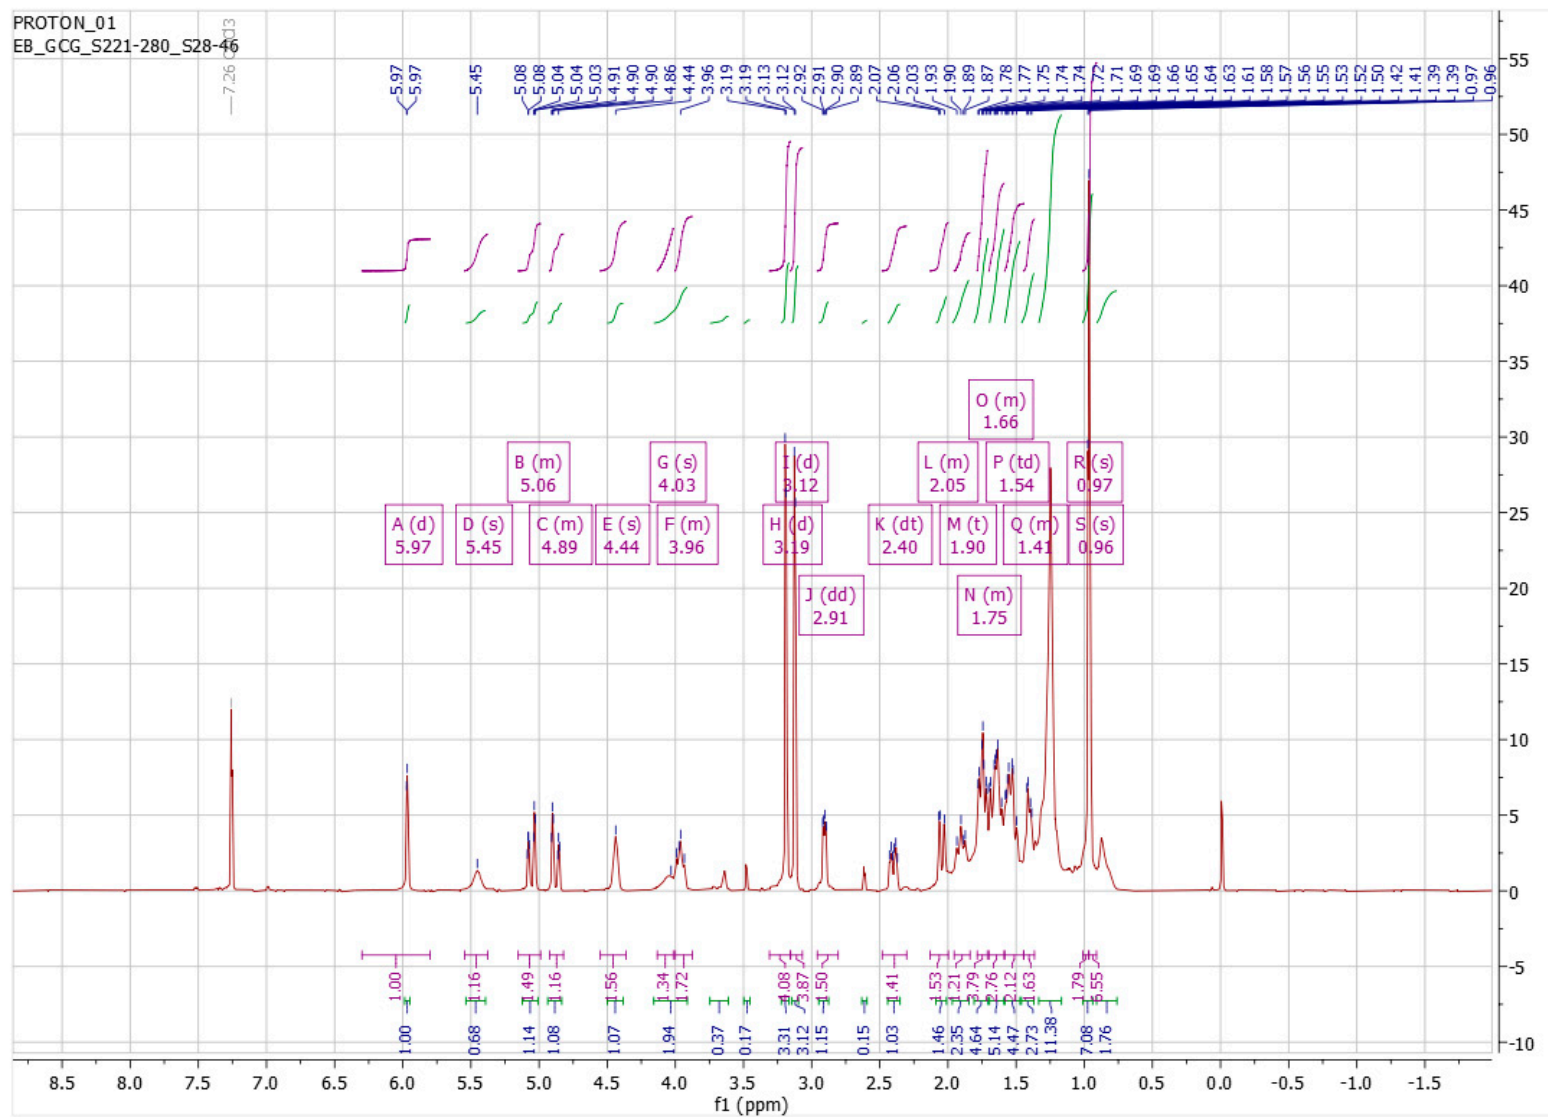

**Figure S40.**  $^1\text{H}$  NMR Spectrum of 3-dimethylacetal-7( $\beta$ )-hydroxygitoxinin (**compound 4**)



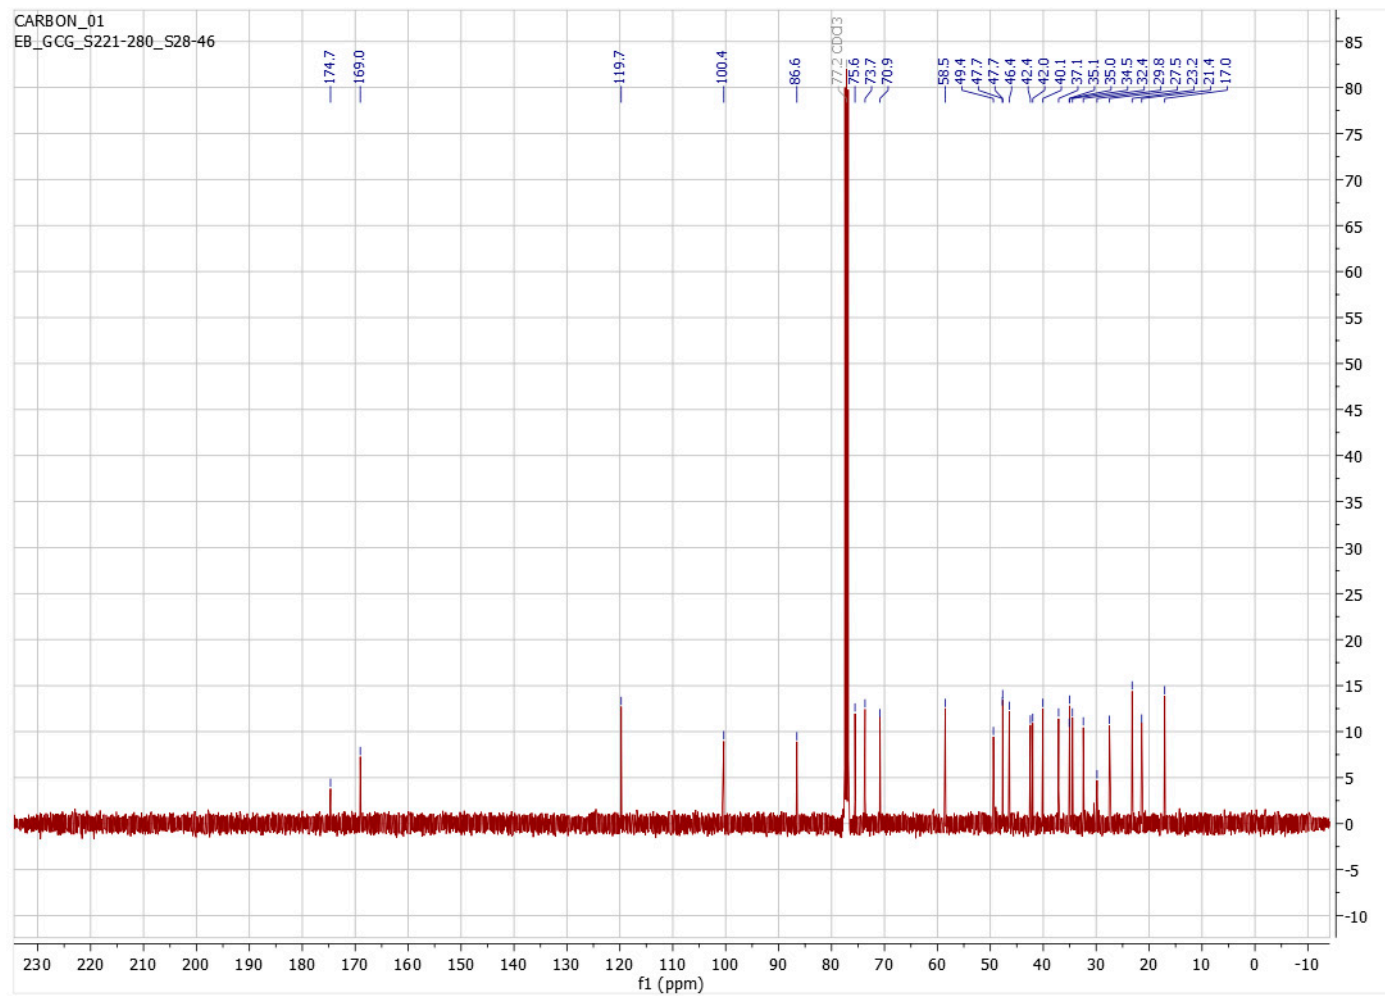

**Figure S41.**  $^{13}\text{C}$  NMR Spectrum of 3-dimethylacetal-7( $\beta$ )-hydroxygitoxinin (**compound 4**)

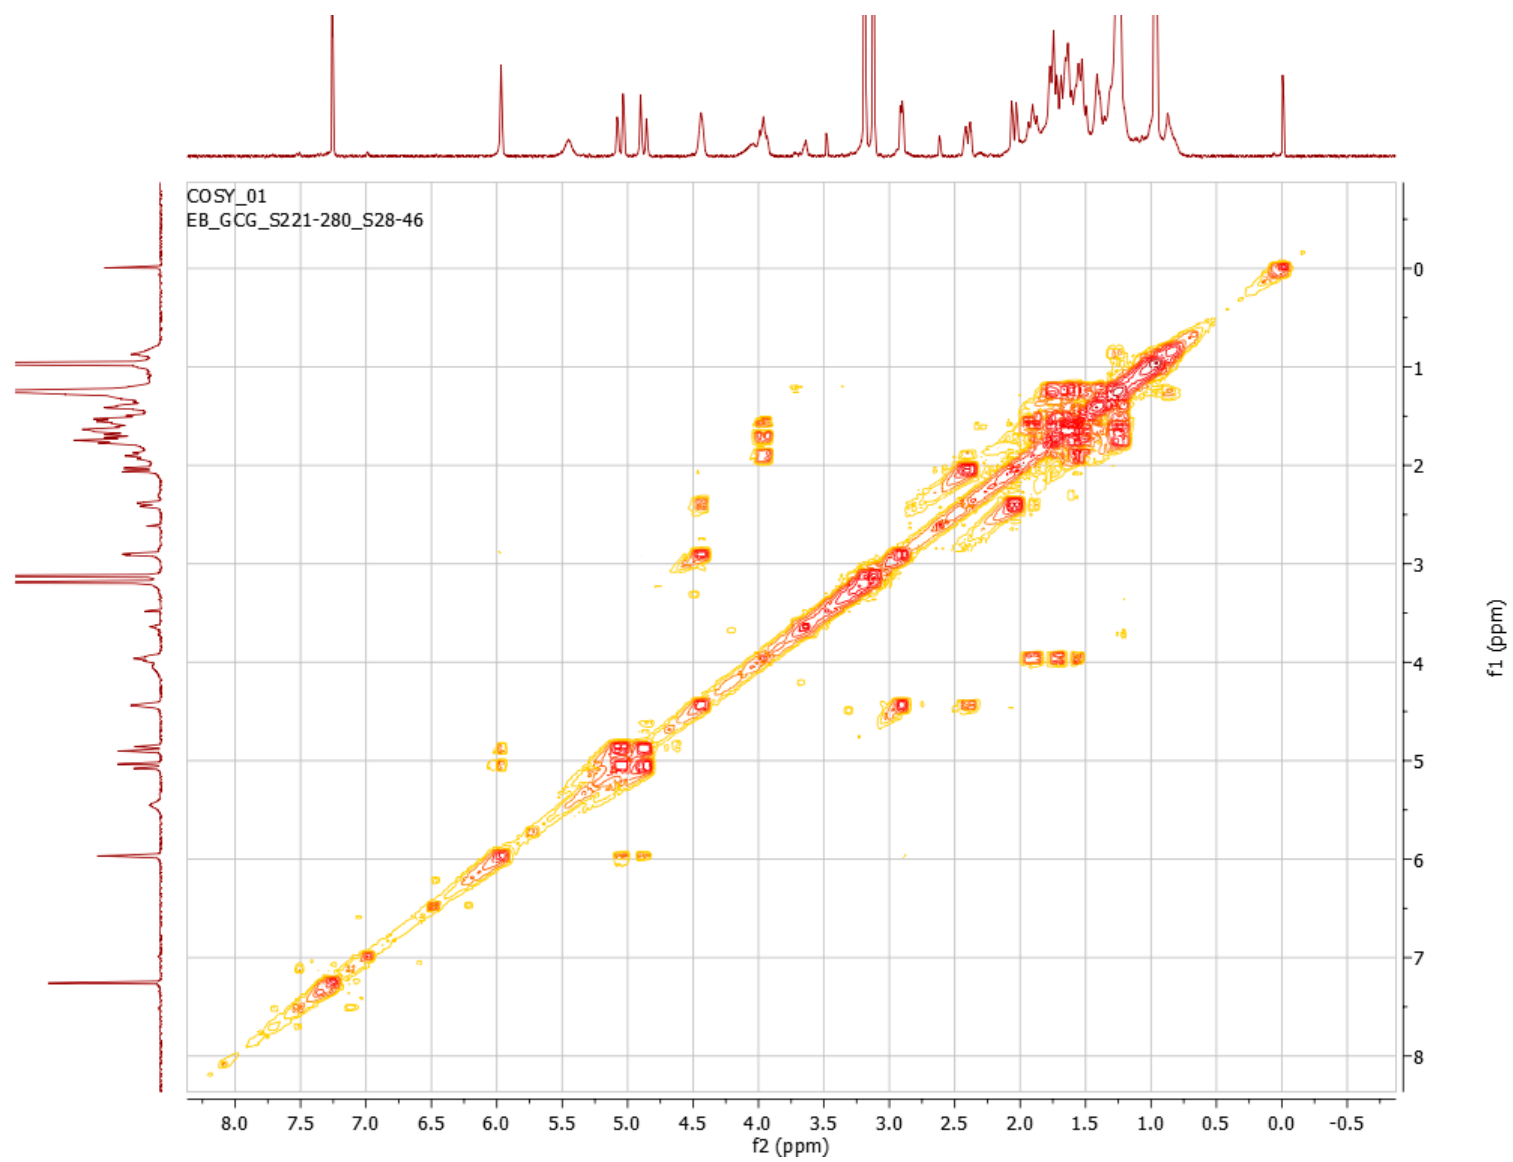

**Figure S42.** COSY Spectrum of 3-dimethylacetal-7( $\beta$ )-hydroxygitoxinin (**compound 4**)

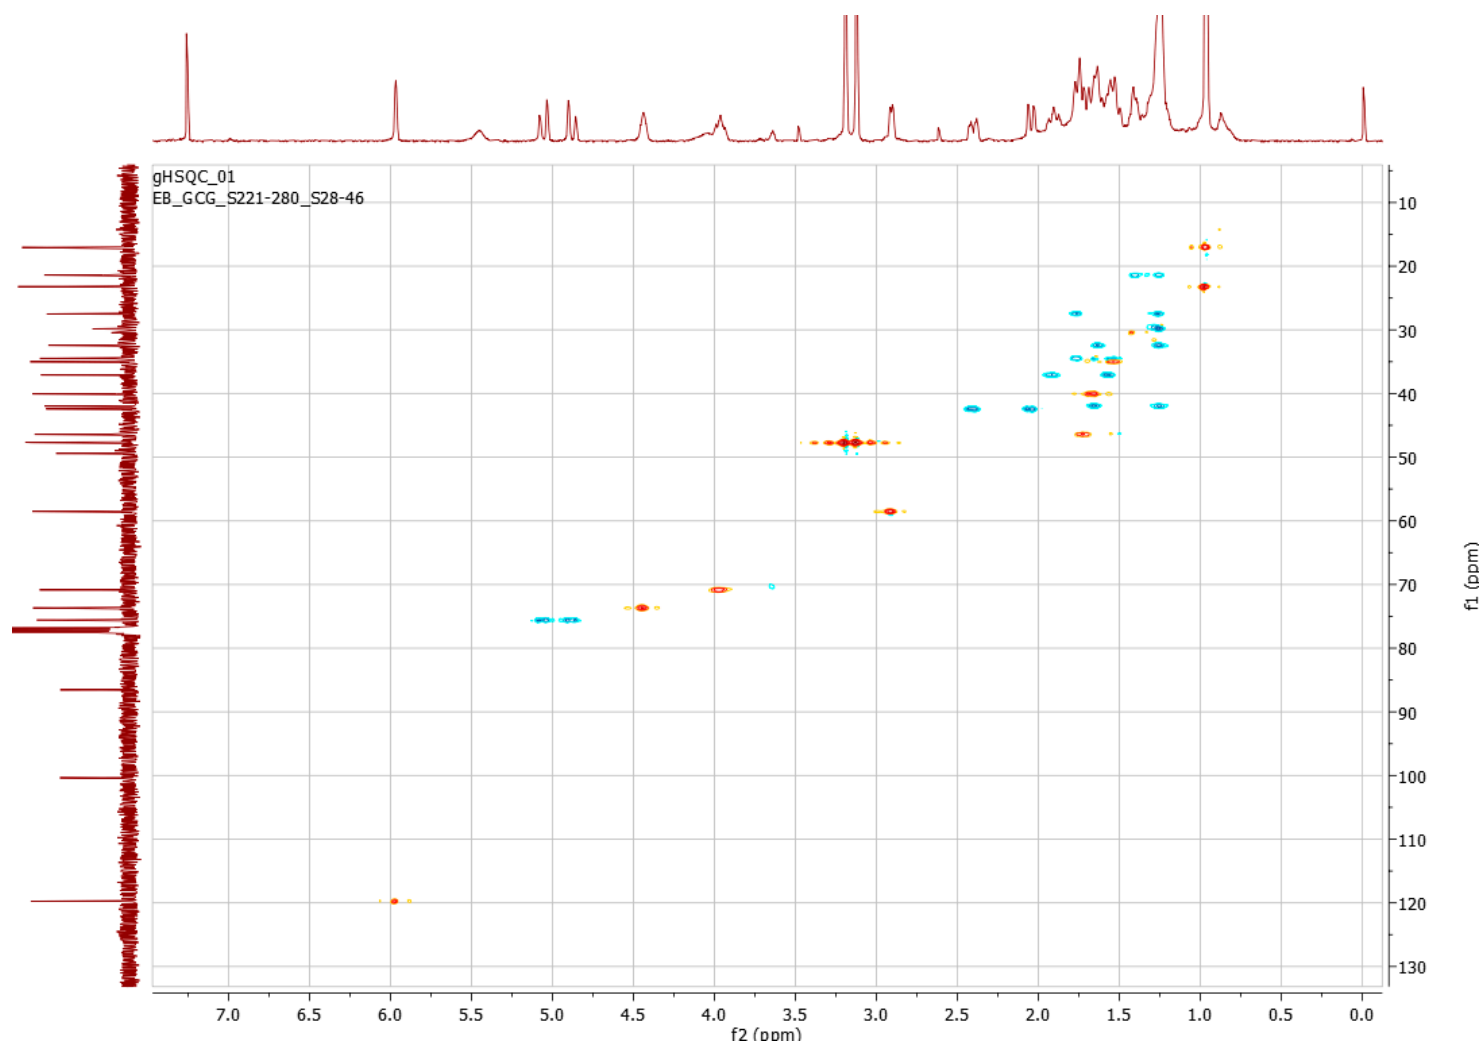

**Figure S43.** HSQC Spectrum of 3-dimethylacetal-7( $\beta$ )-hydroxygitoxigenin (**compound 4**)

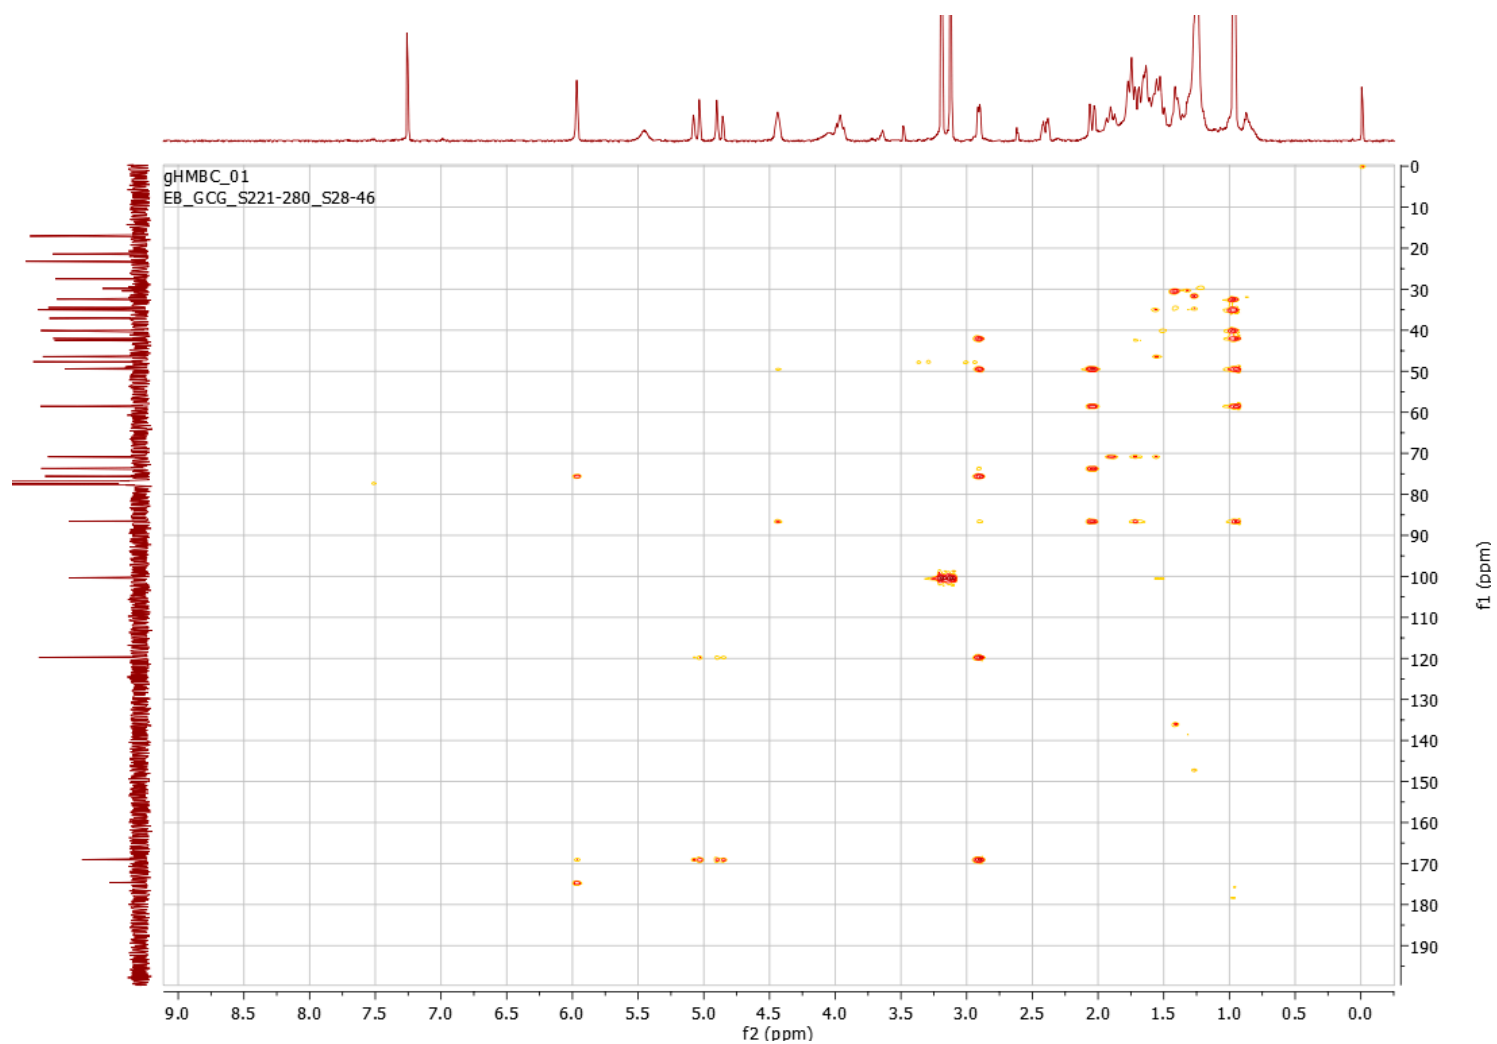

**Figure S44.** HMBC Spectrum of 3-dimethylacetal-7( $\beta$ )-hydroxygitoxigenin (**compound 4**)

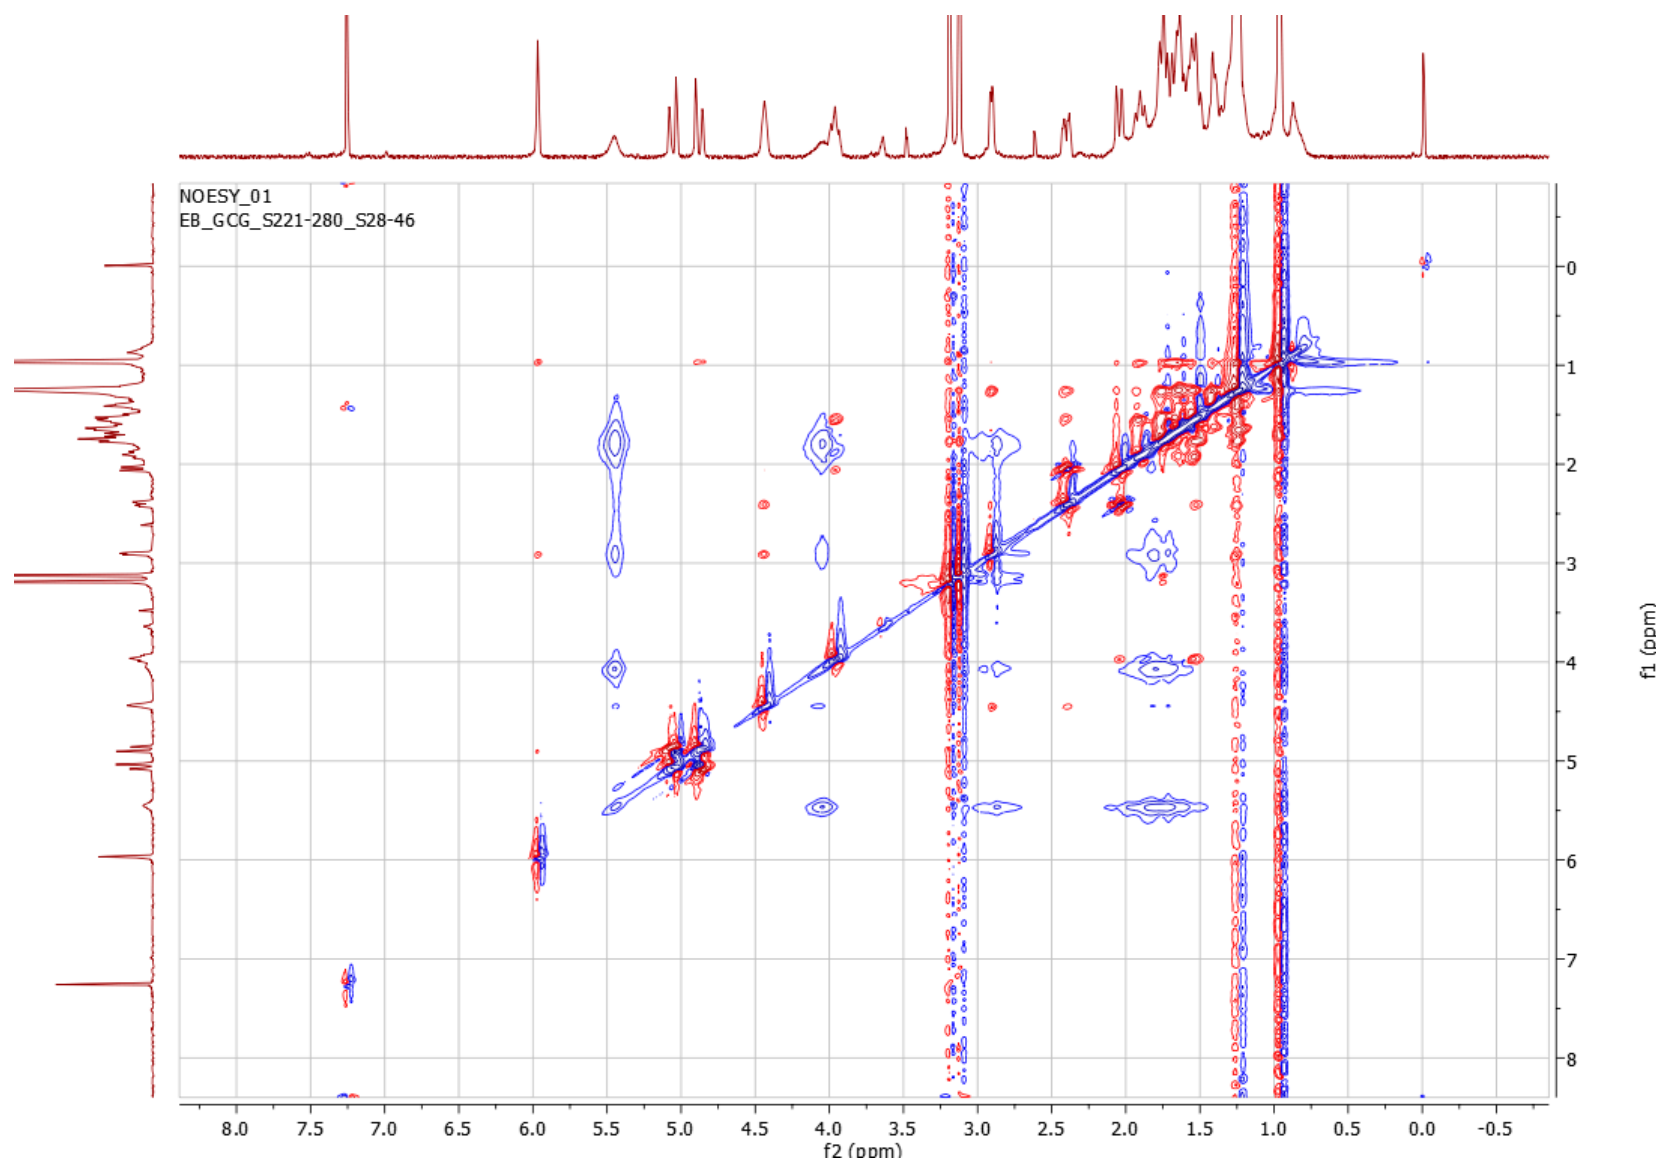

**Figure S45.** NOESY Spectrum of 3-dimethylacetal-7( $\beta$ )-hydroxygitoxigenin (**compound 4**)

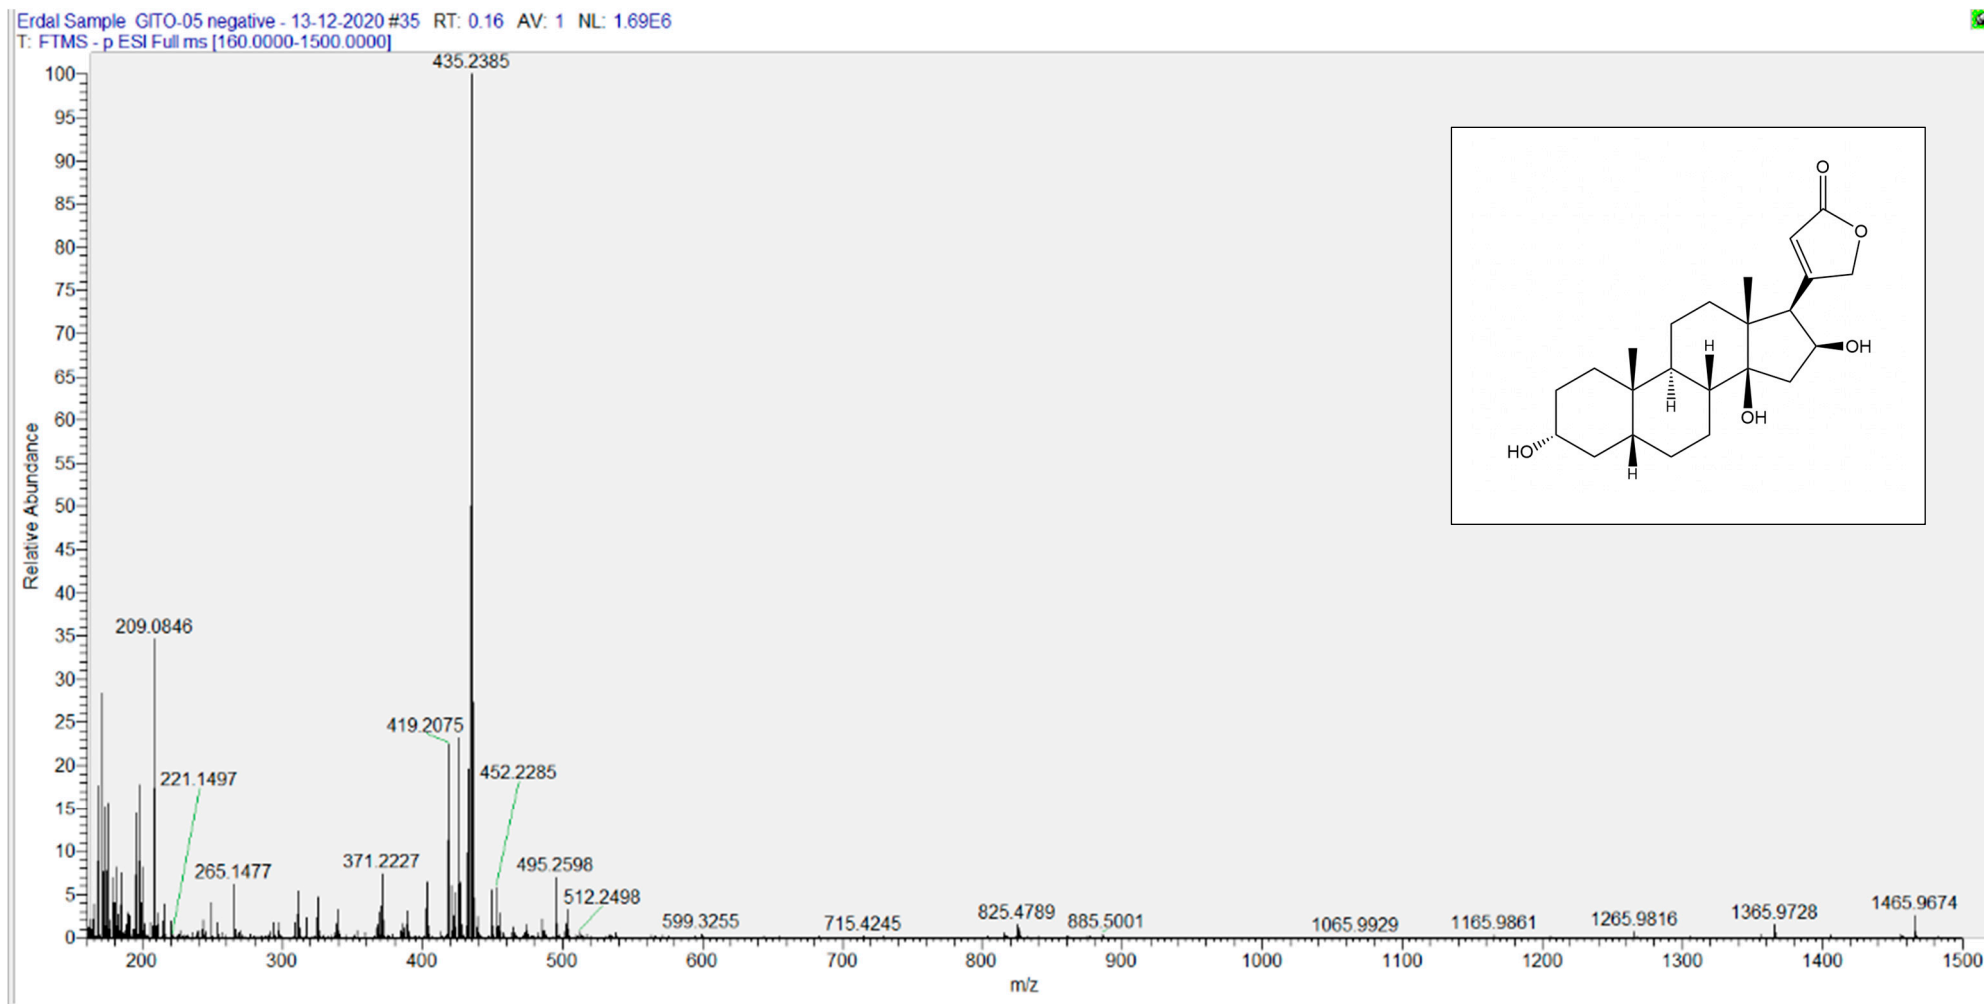

**Figure S46.** Negative-ion mode HR-ESI-MS spectrum of 3-epi-gitoxigenin (**compound 5**)

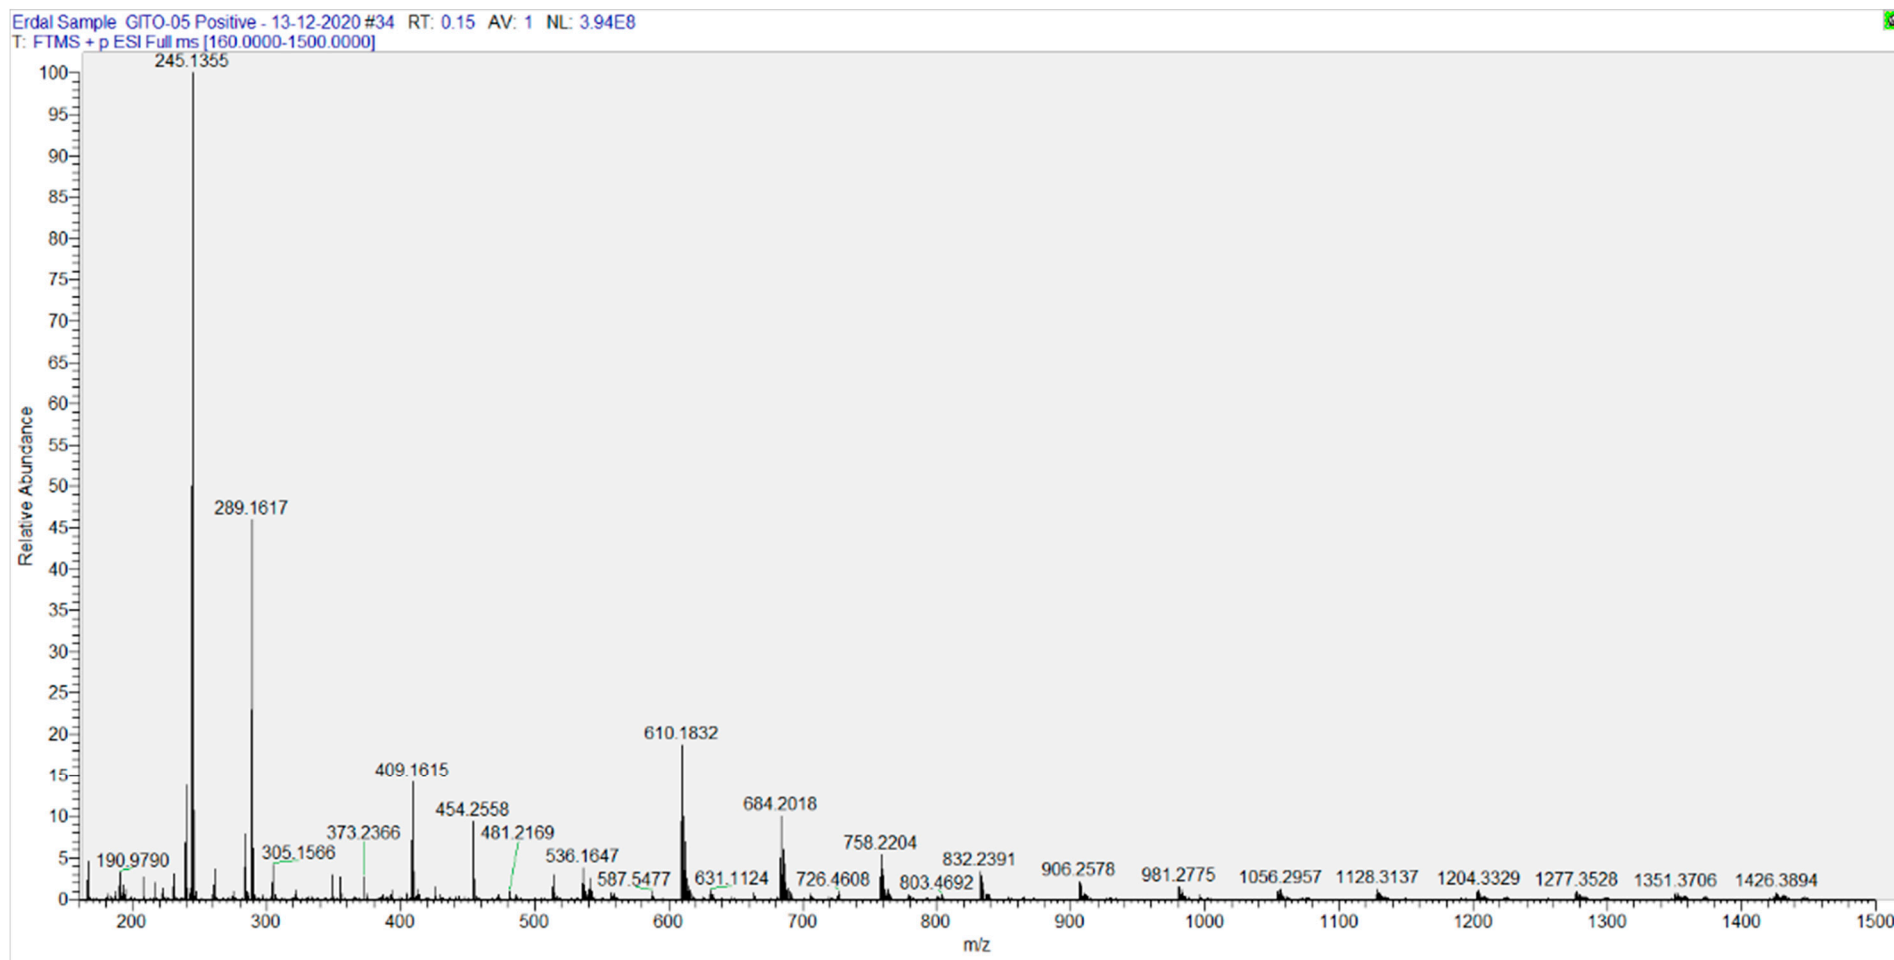

**Figure S47.** Positive-ion mode HR-ESI-MS spectrum of 3-epi-gitoxigenin (**compound 5**)

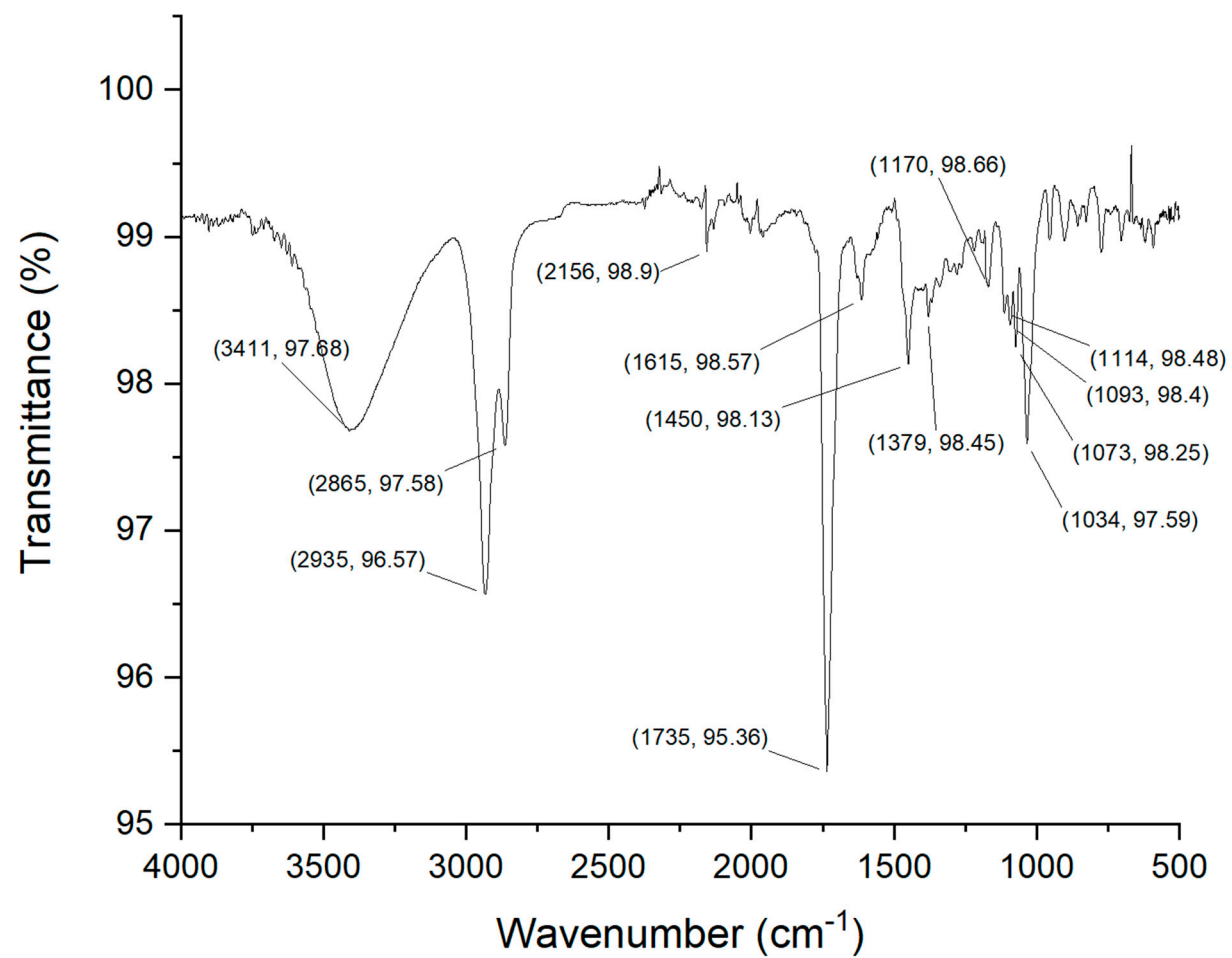

**Figure S48.** FT-IR Spectrum of 3-epi-gitoxigenin (**compound 5**)





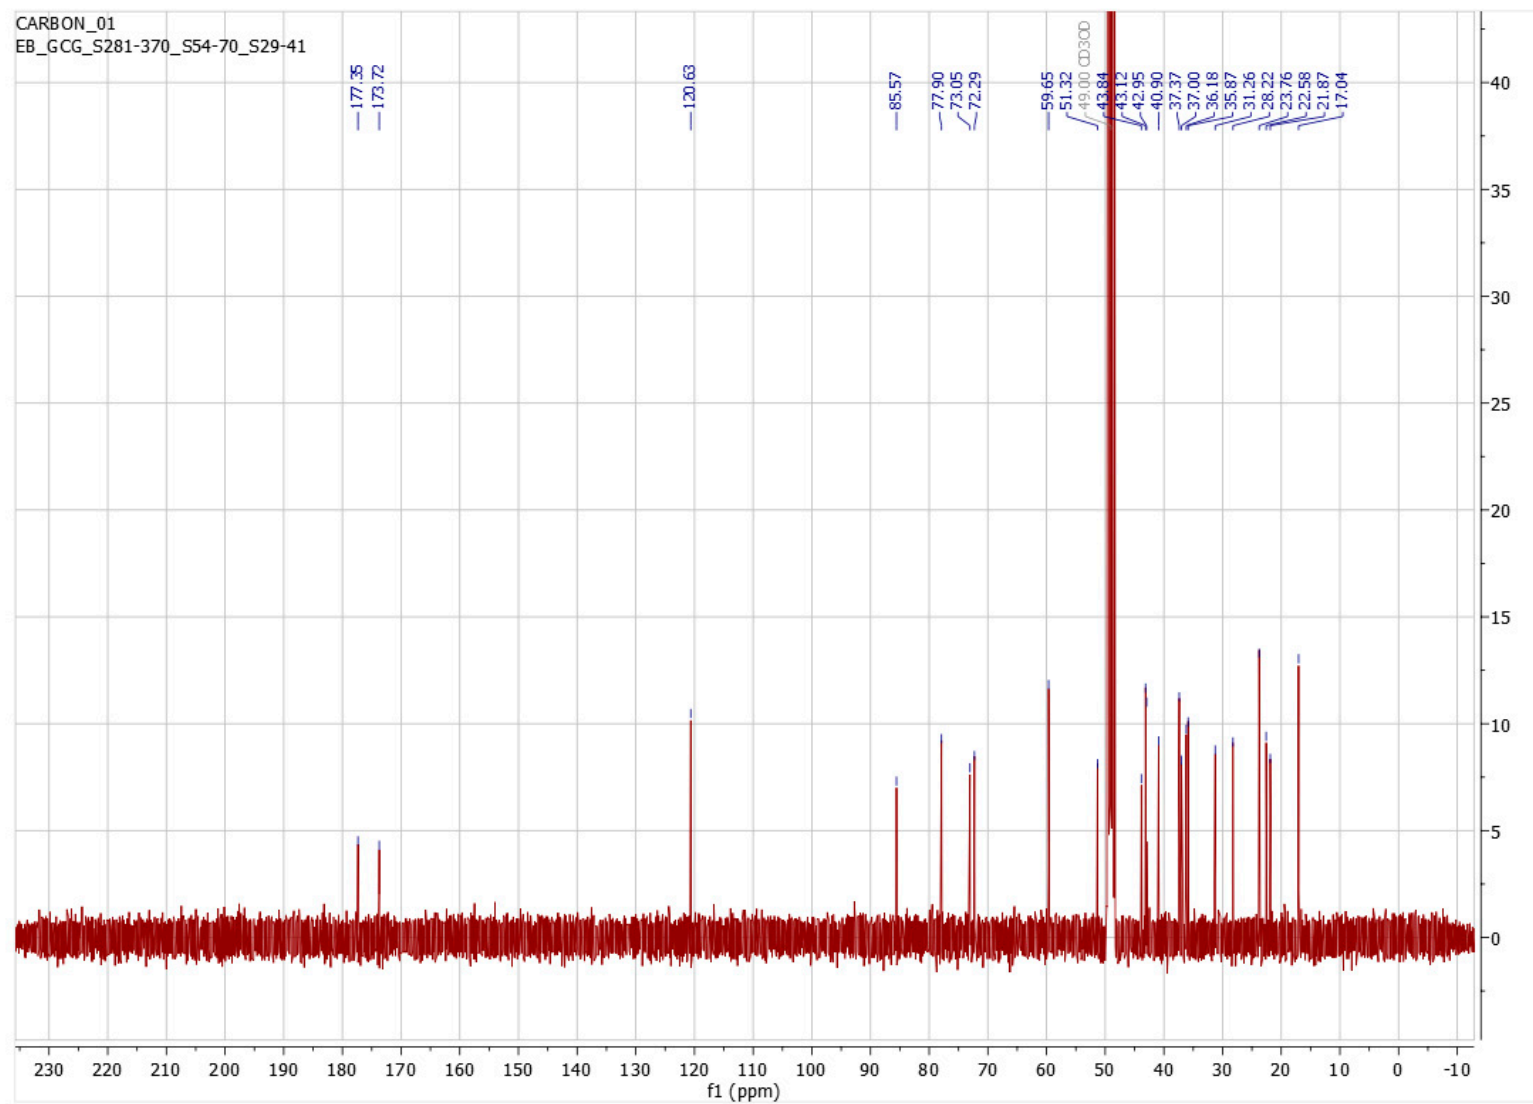

**Figure S50.**  $^{13}\text{C}$  NMR Spectrum of 3-epi-gitoxigenin (**compound 5**)

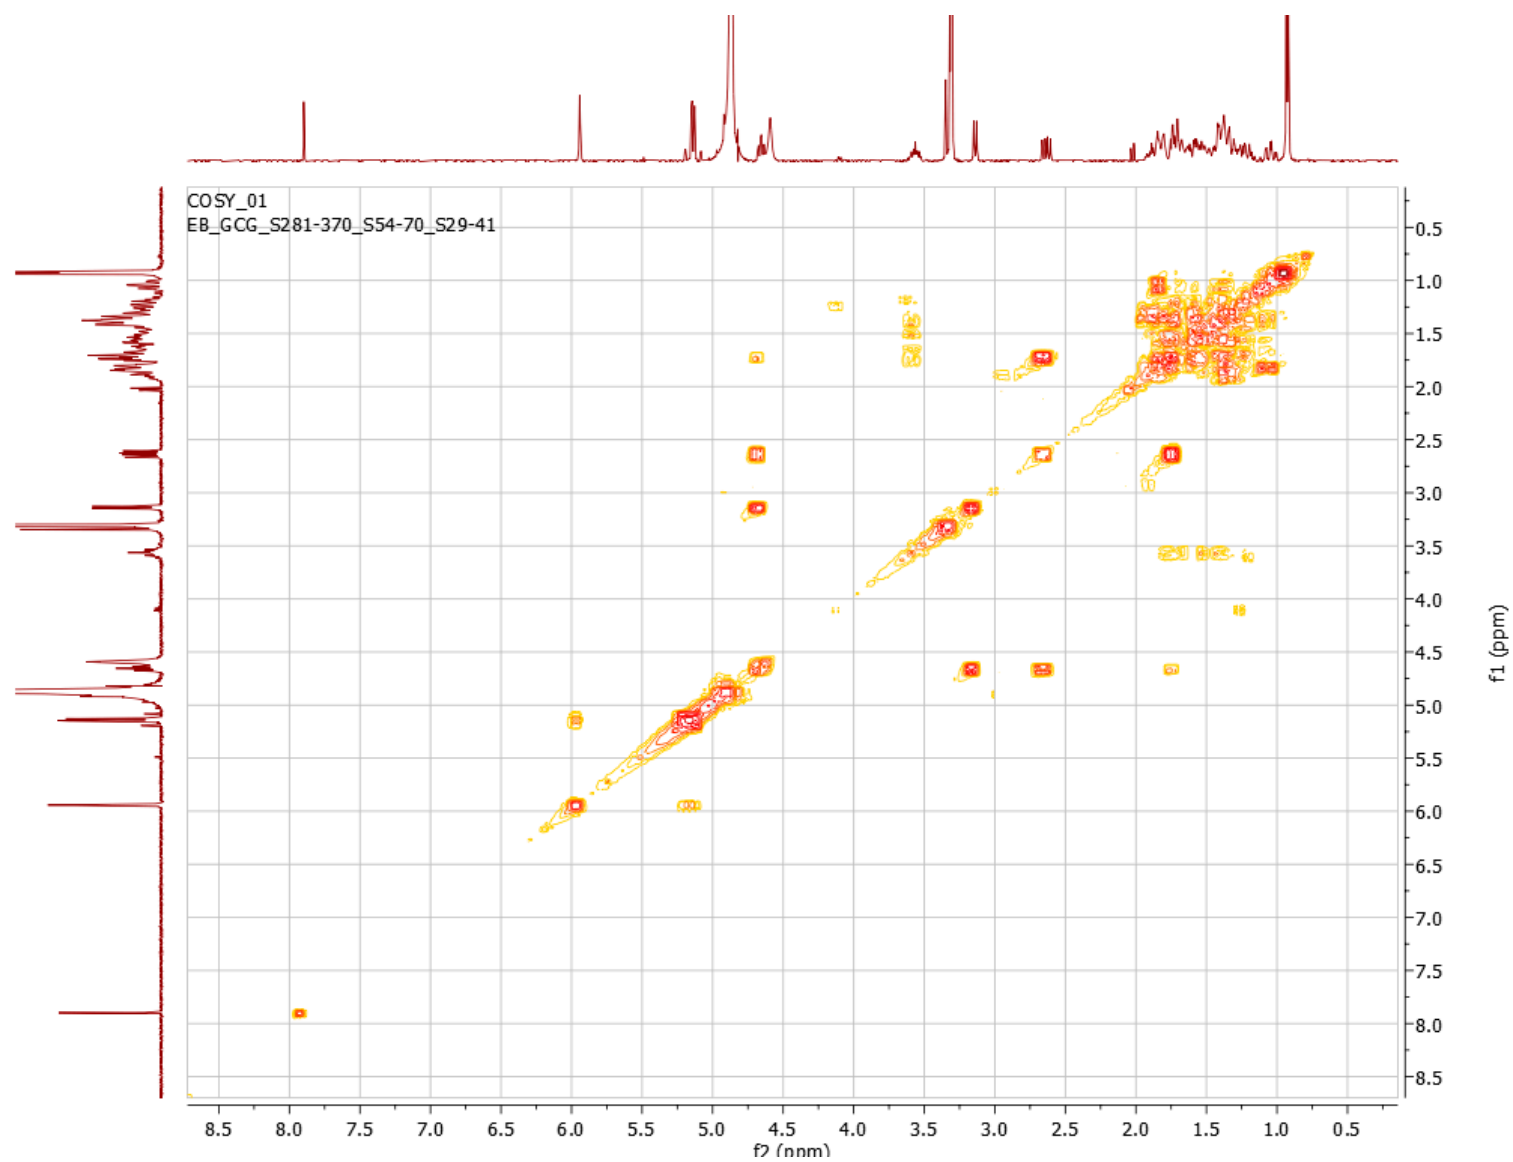

**Figure S51.** COSY Spectrum of 3-epi-gitoxigenin (compound 5)

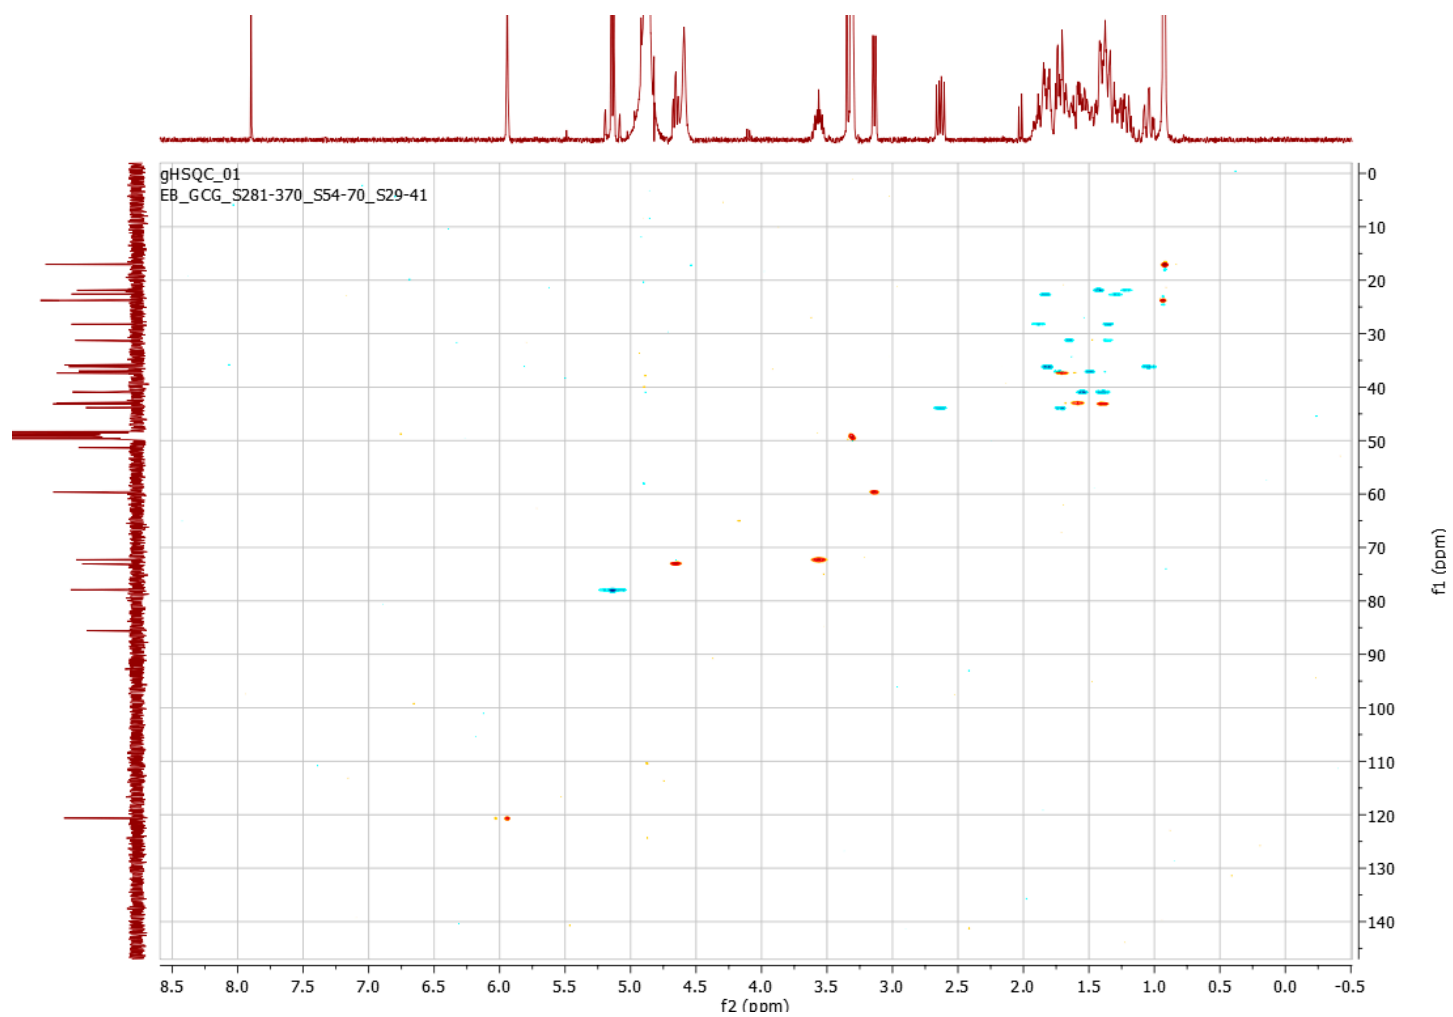

**Figure S52.** HSQC Spectrum of 3-epi-gitoxigenin (**compound 5**)

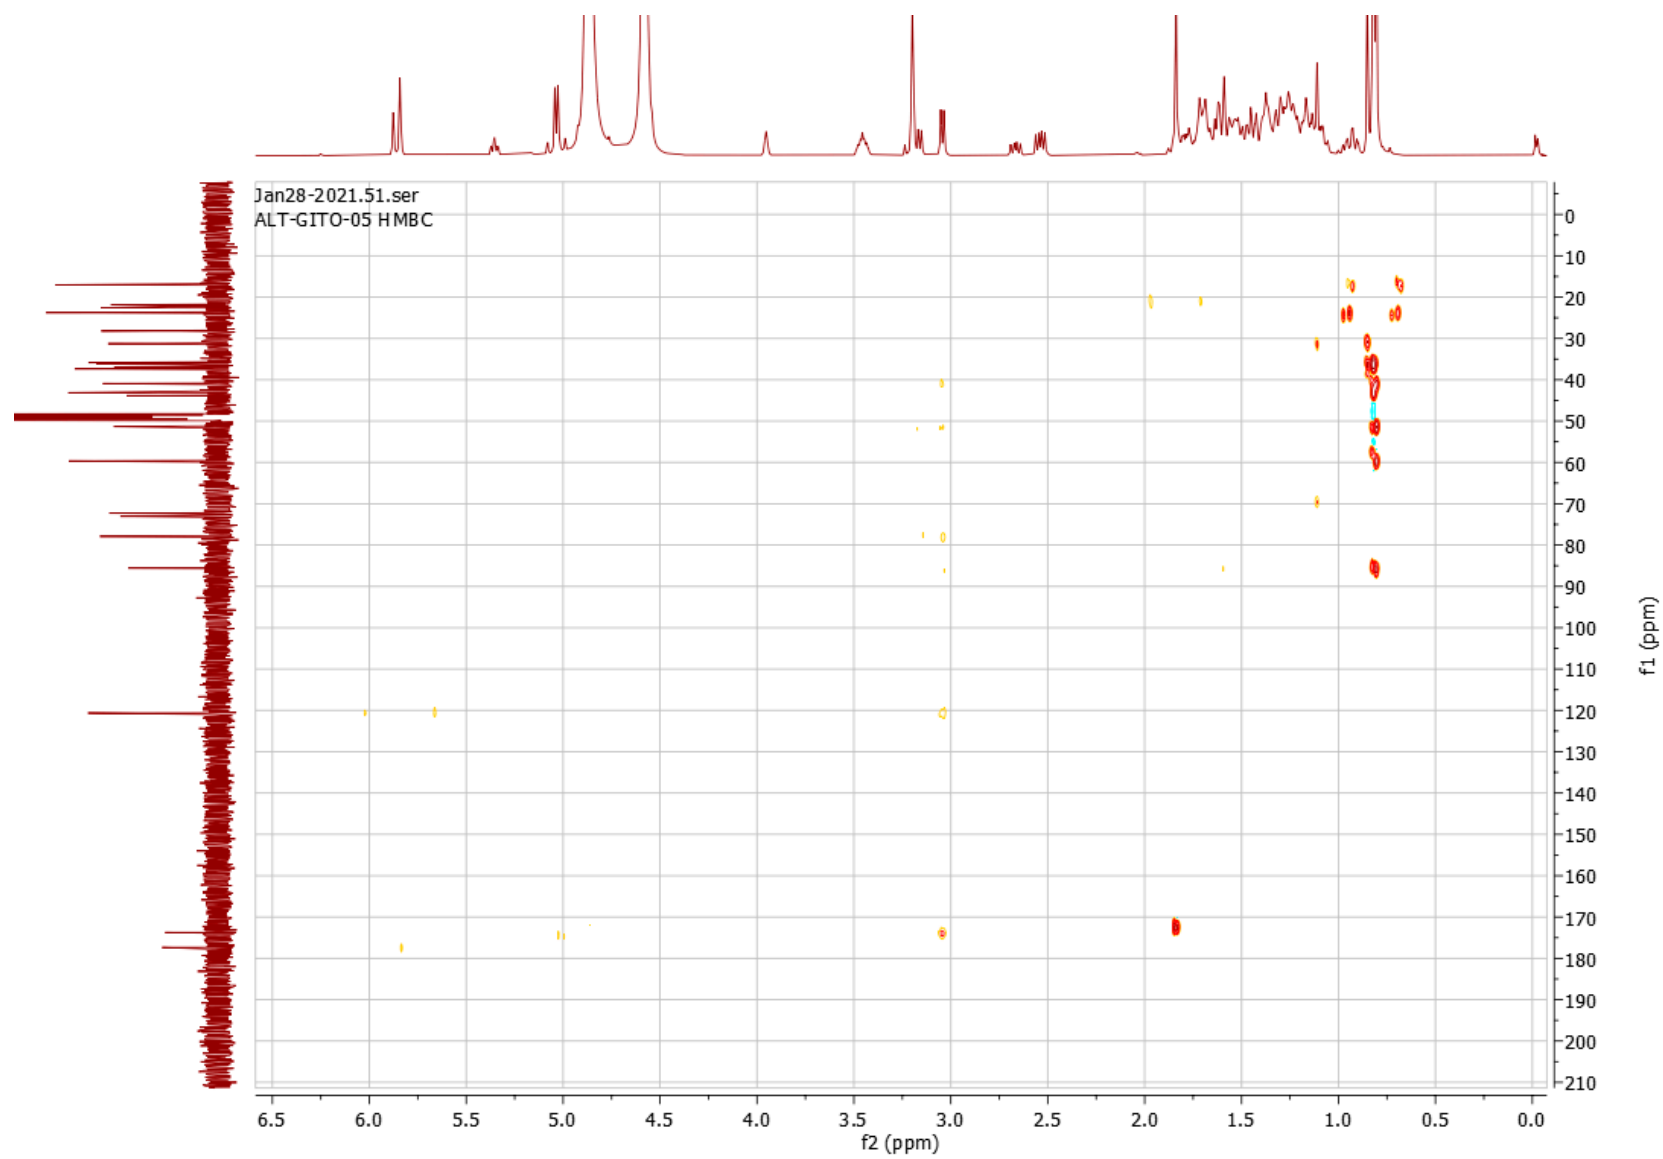

**Figure S53.** HMBC Spectrum of 3-epi-gitoxigenin (**compound 5**)

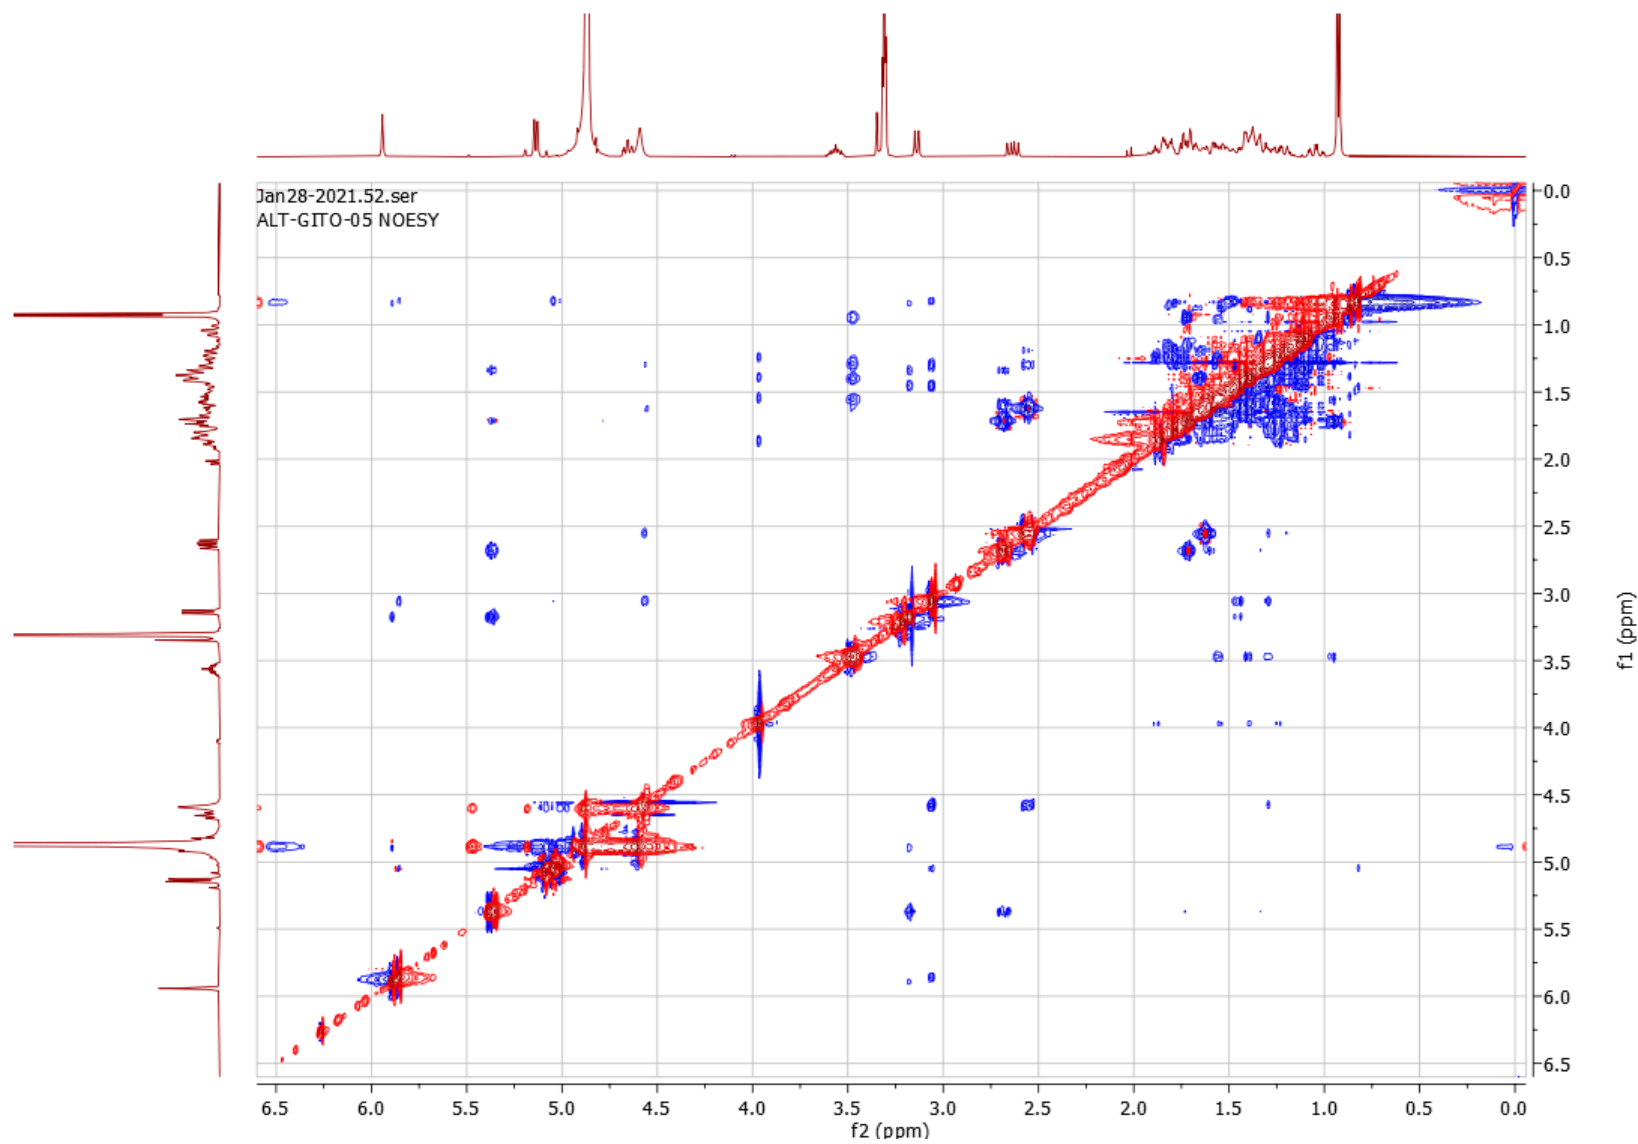

**Figure S54.** NOESY Spectrum of 3-epi-gitoxigenin (compound 5)

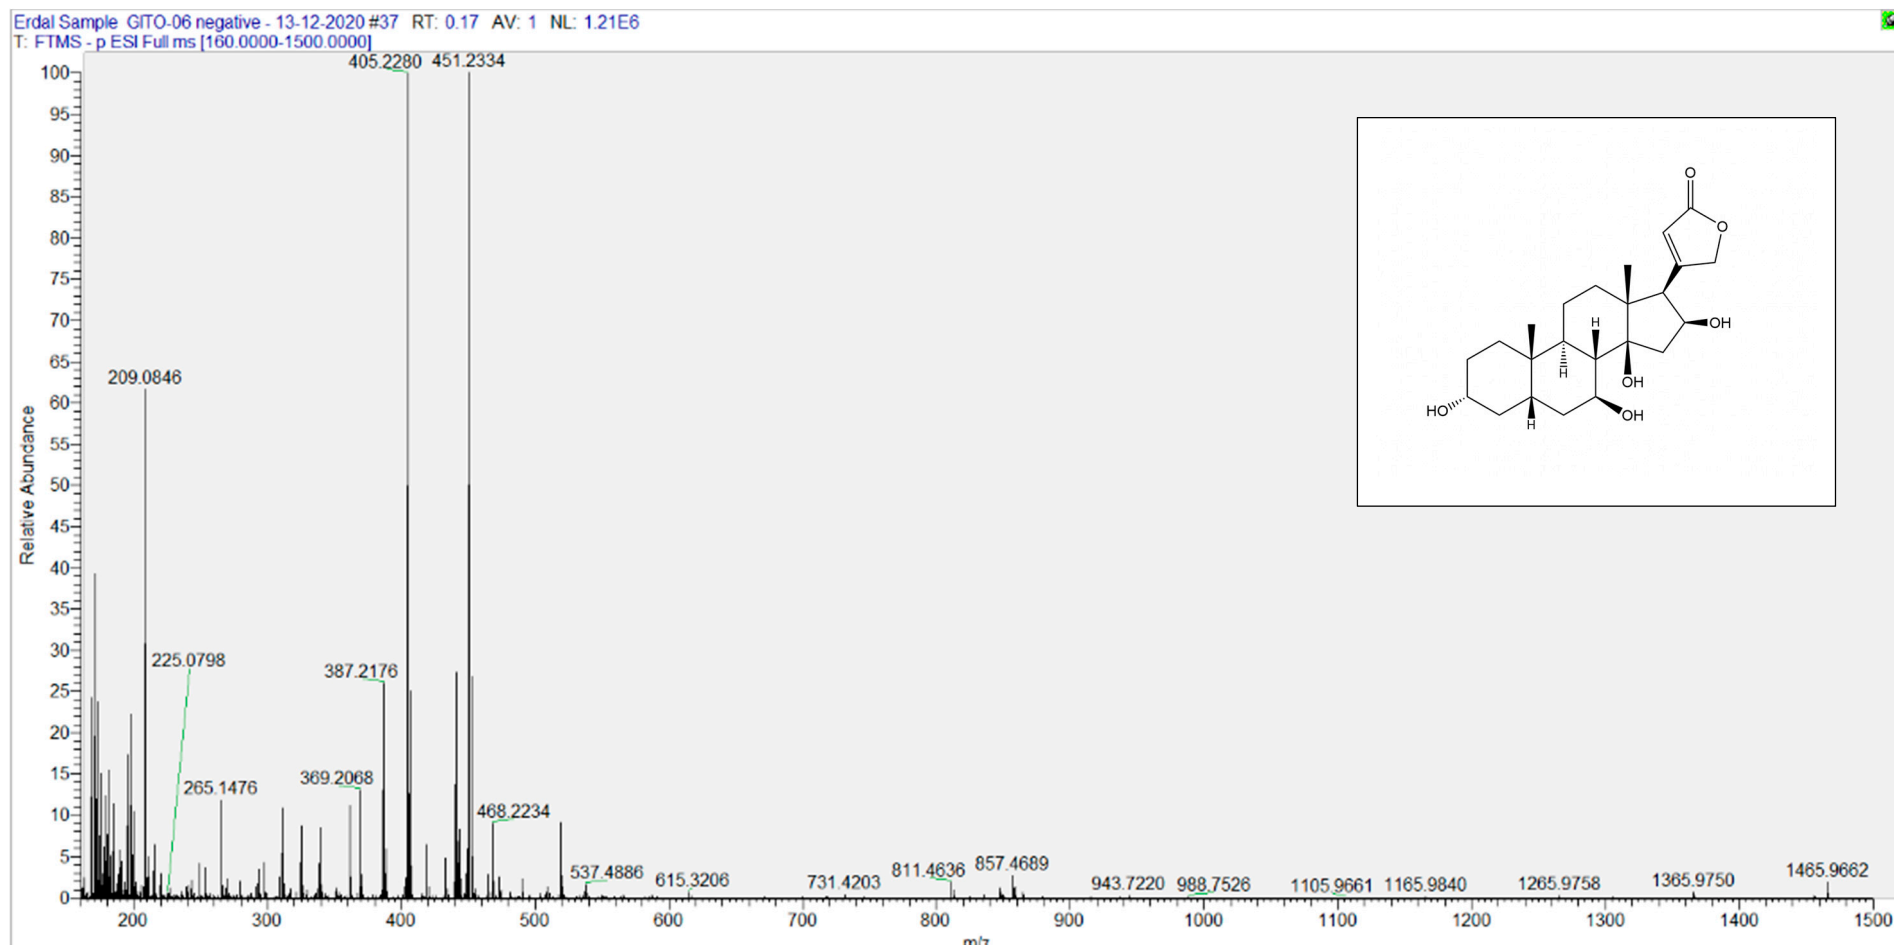

**Figure S55.** Negative-ion mode HR-ESI-MS spectrum of 7( $\beta$ )-hydroxy-3-epi-gitoxigenin (compound 6)

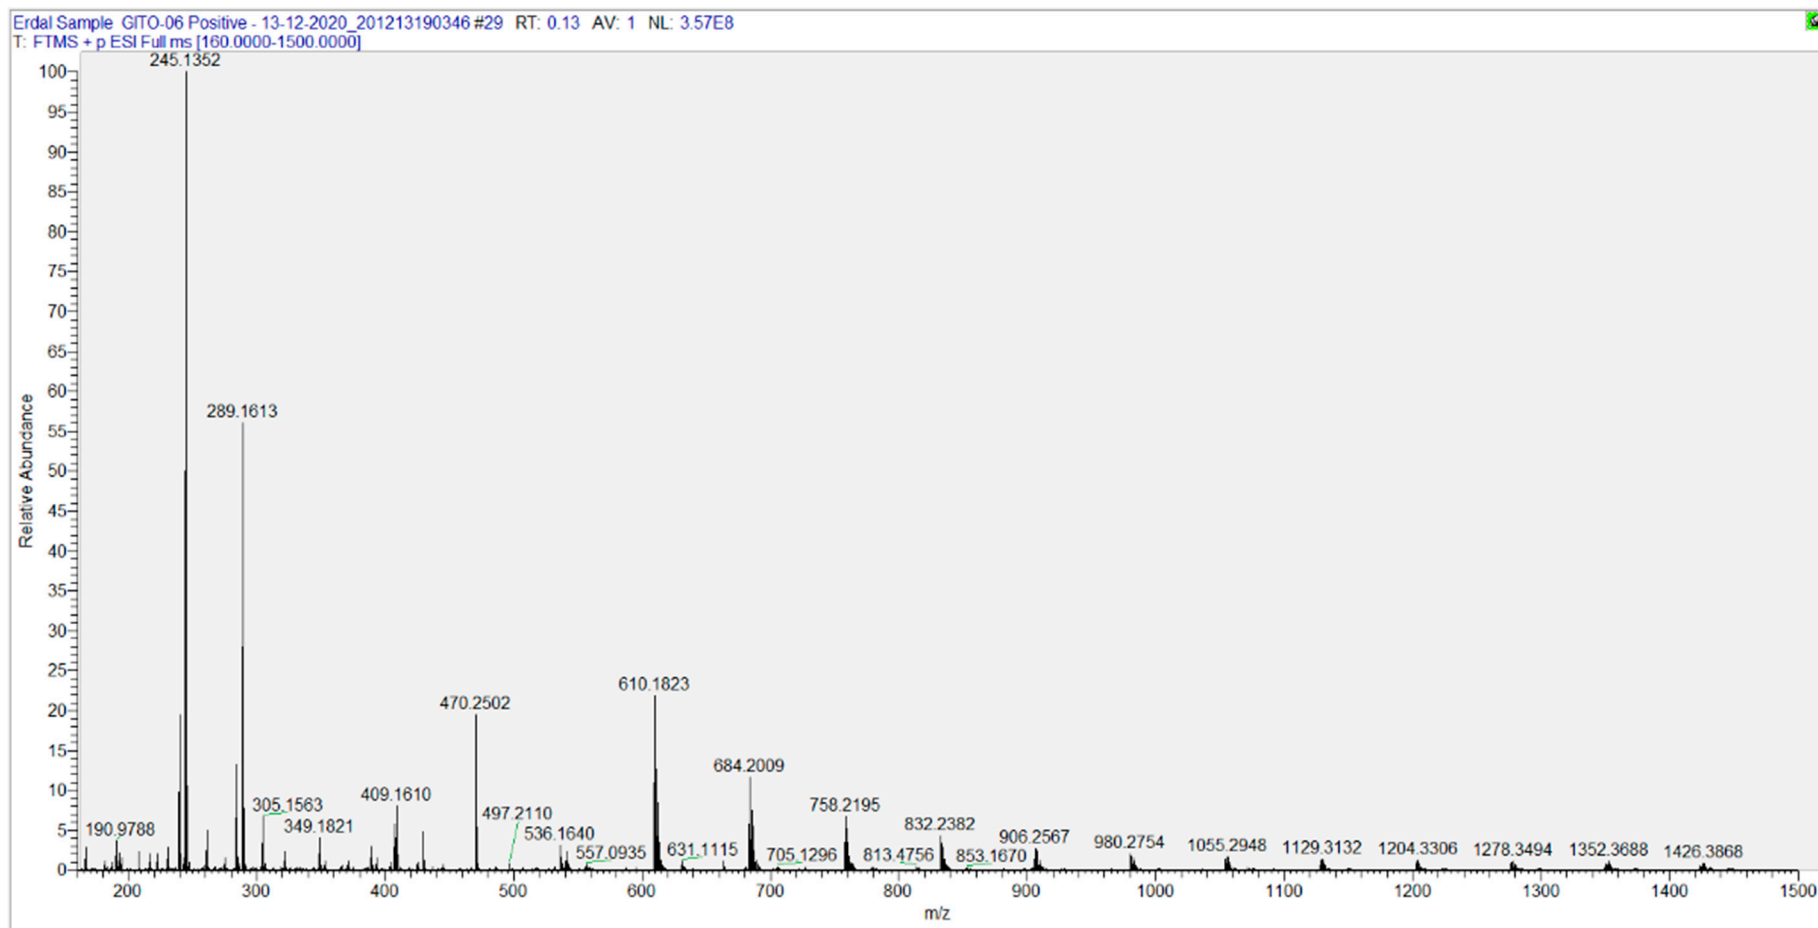

**Figure S56.** Positive-ion mode HR-ESI-MS spectrum of 7( $\beta$ )-hydroxy-3-epi-gitoxigenin (**compound 6**)



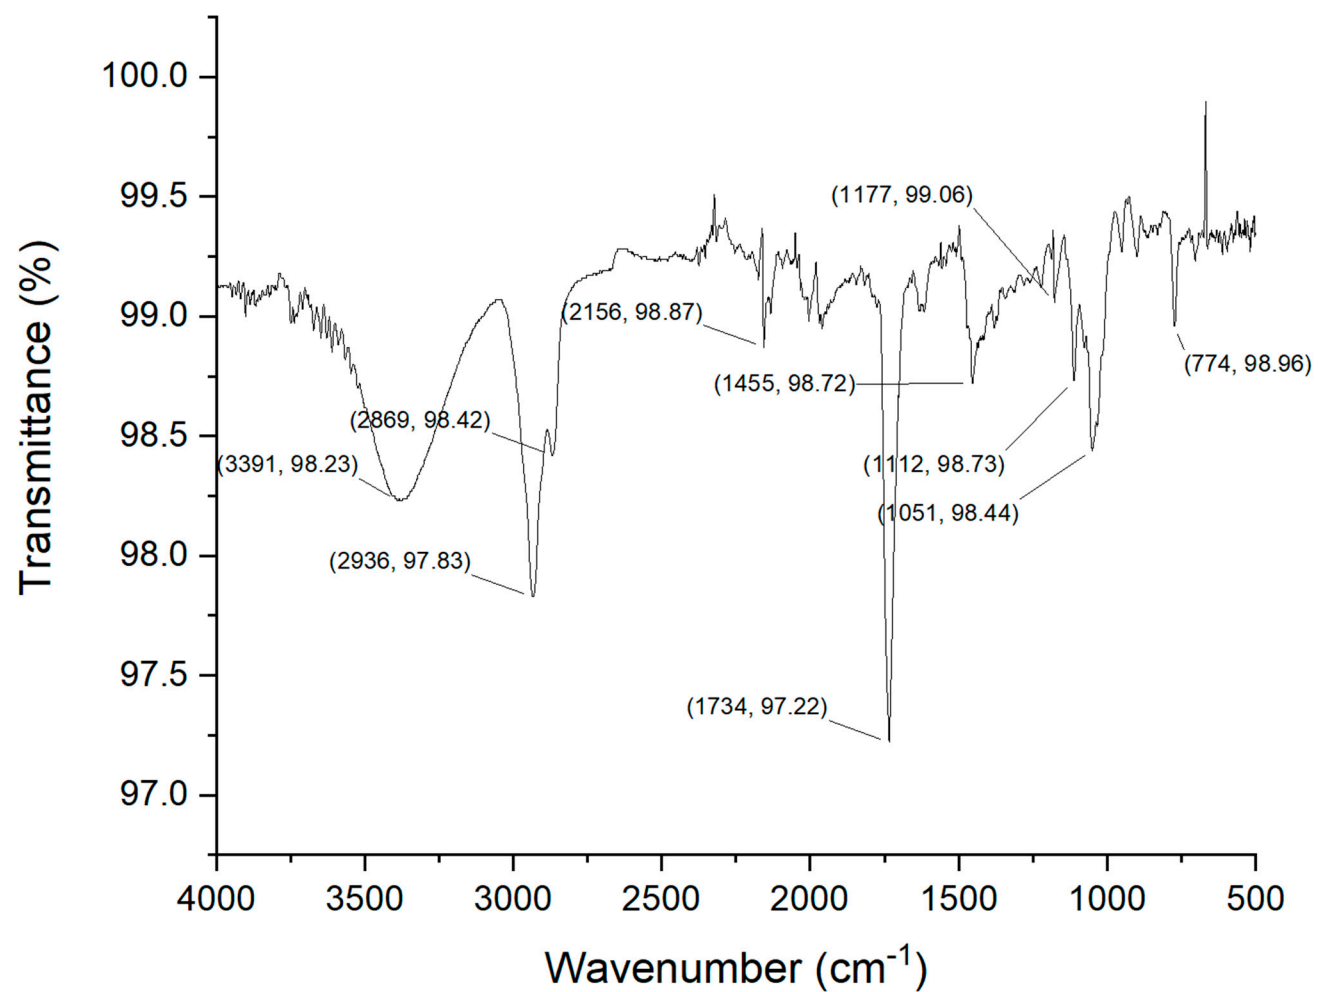

**Figure S57:** FT-IR Spectrum of 7(β)-hydroxy-3-epi-gitoxigenin (**compound 6**)

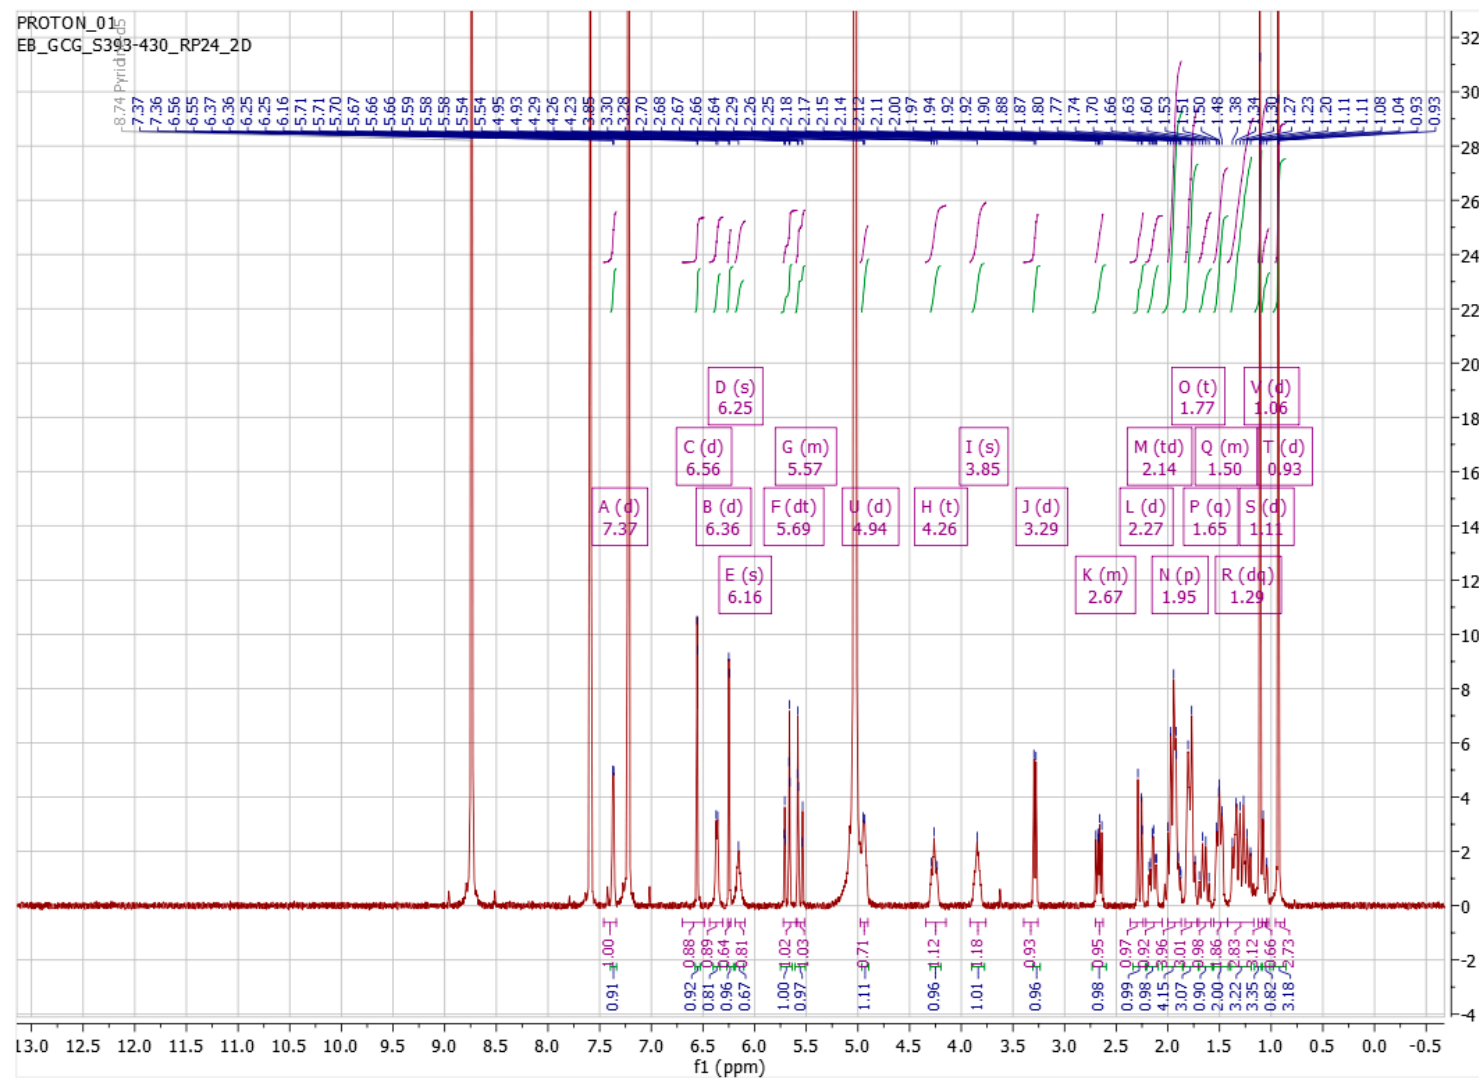

**Figure S58.**  $^1\text{H}$  NMR Spectrum of 7( $\beta$ )-hydroxy-3-epi-gitoxigenin (**compound 6**)

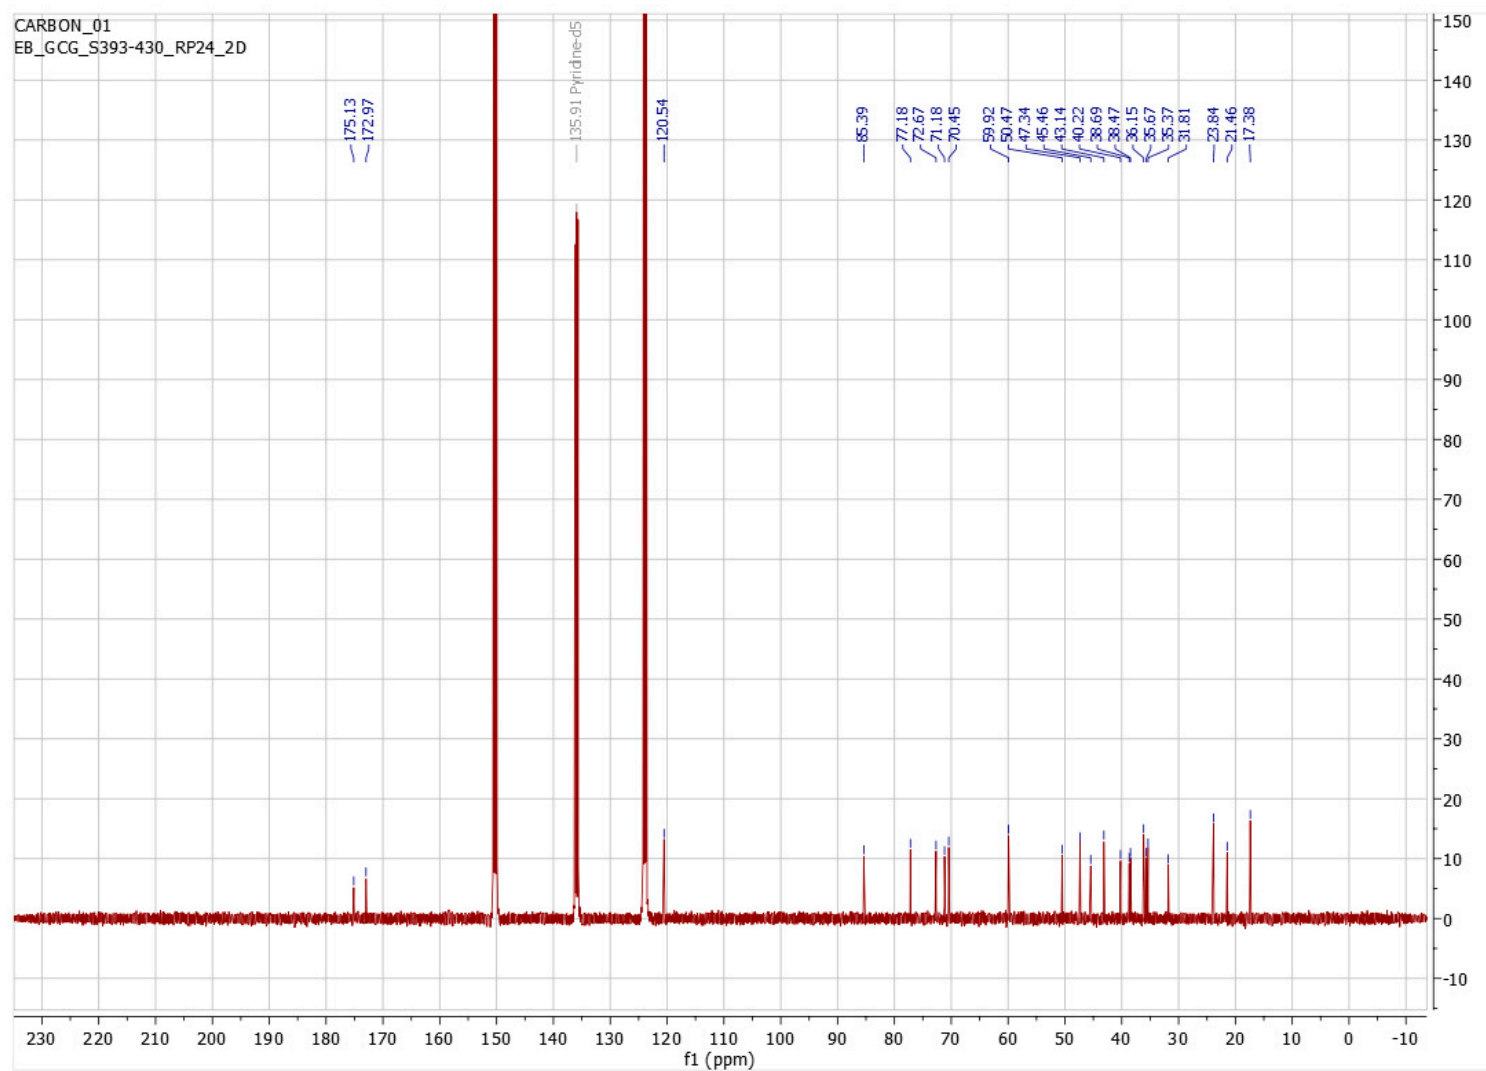

**Figure S59.**  $^{13}\text{C}$  NMR Spectrum of 7( $\beta$ )-hydroxy-3-epi-gitoxigenin (**compound 6**)

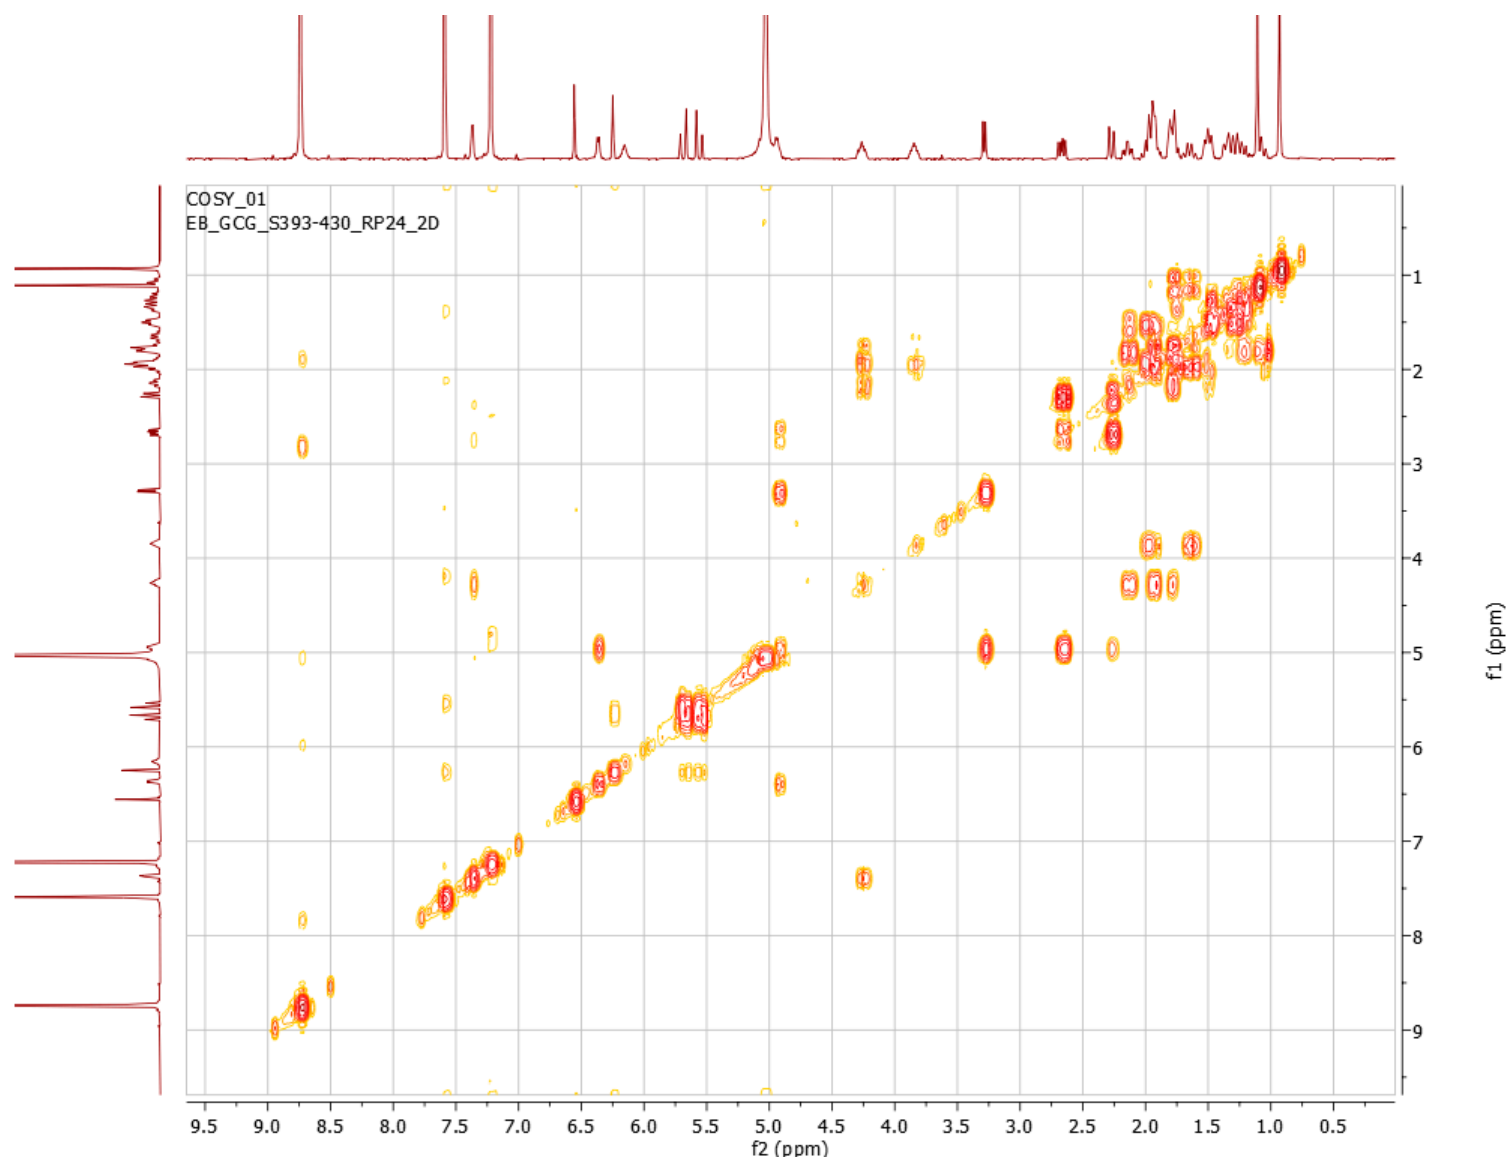

**Figure S60.** COSY Spectrum of 7( $\beta$ )-hydroxy-3-epi-gitoxigenin (**compound 6**)

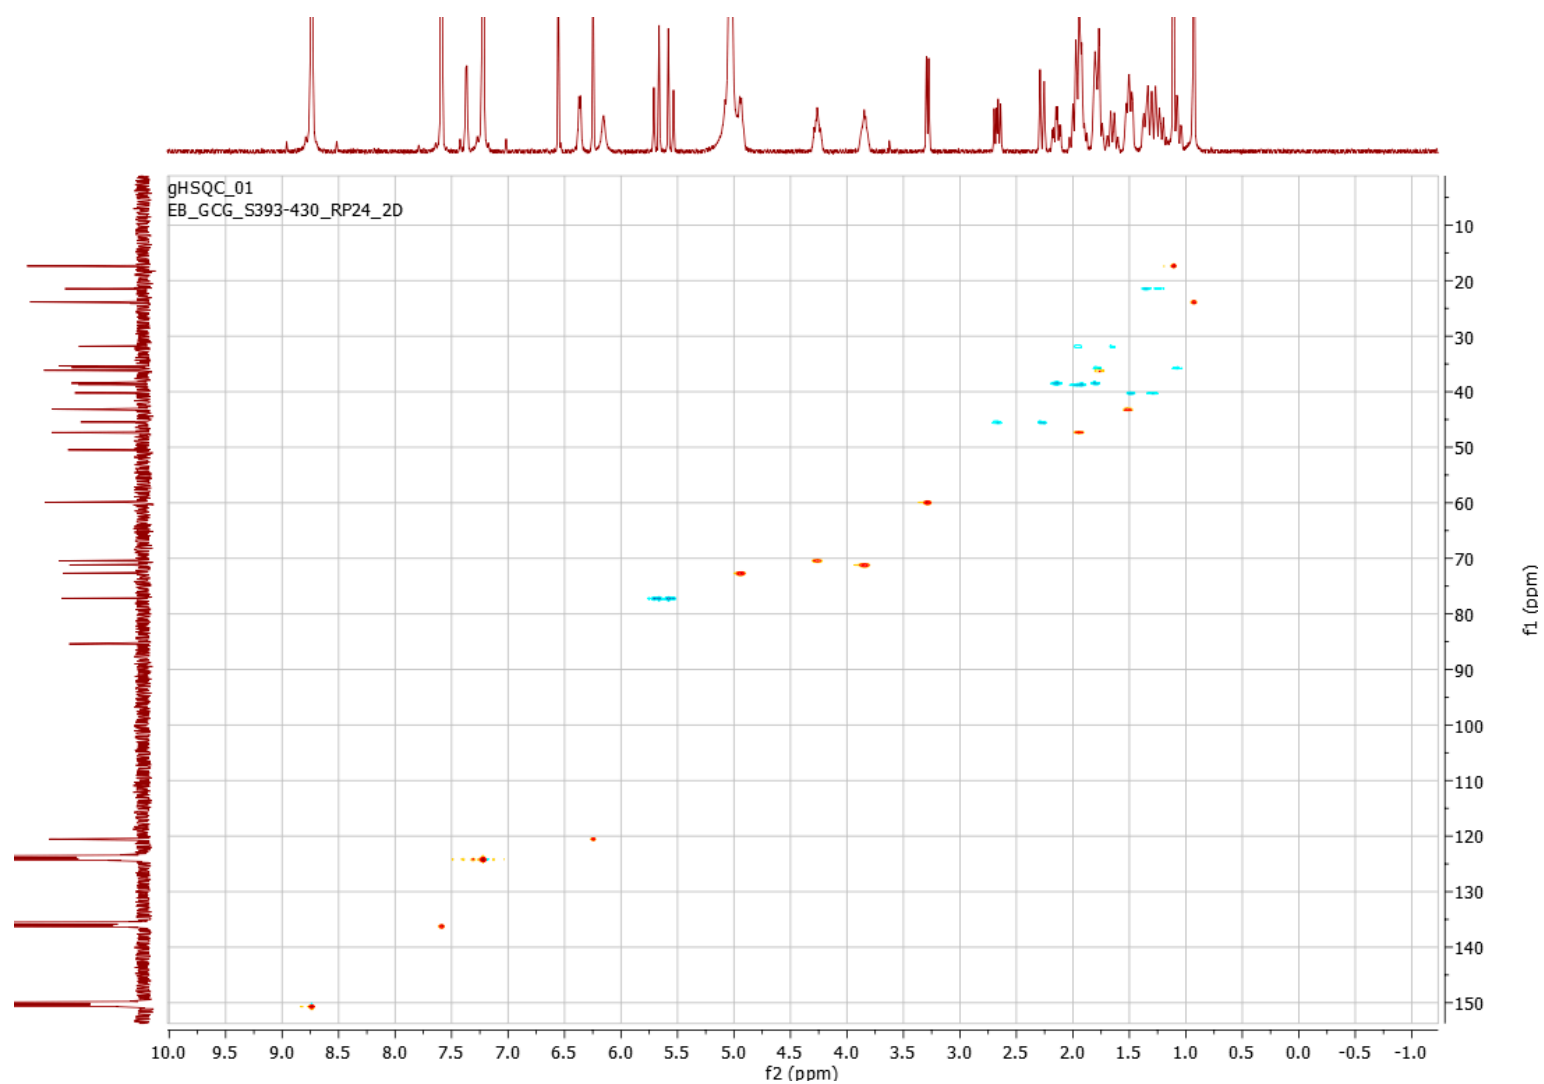

**Figure S61.** HSQC Spectrum of 7( $\beta$ )-hydroxy-3-epi-gitoxigenin (**compound 6**)

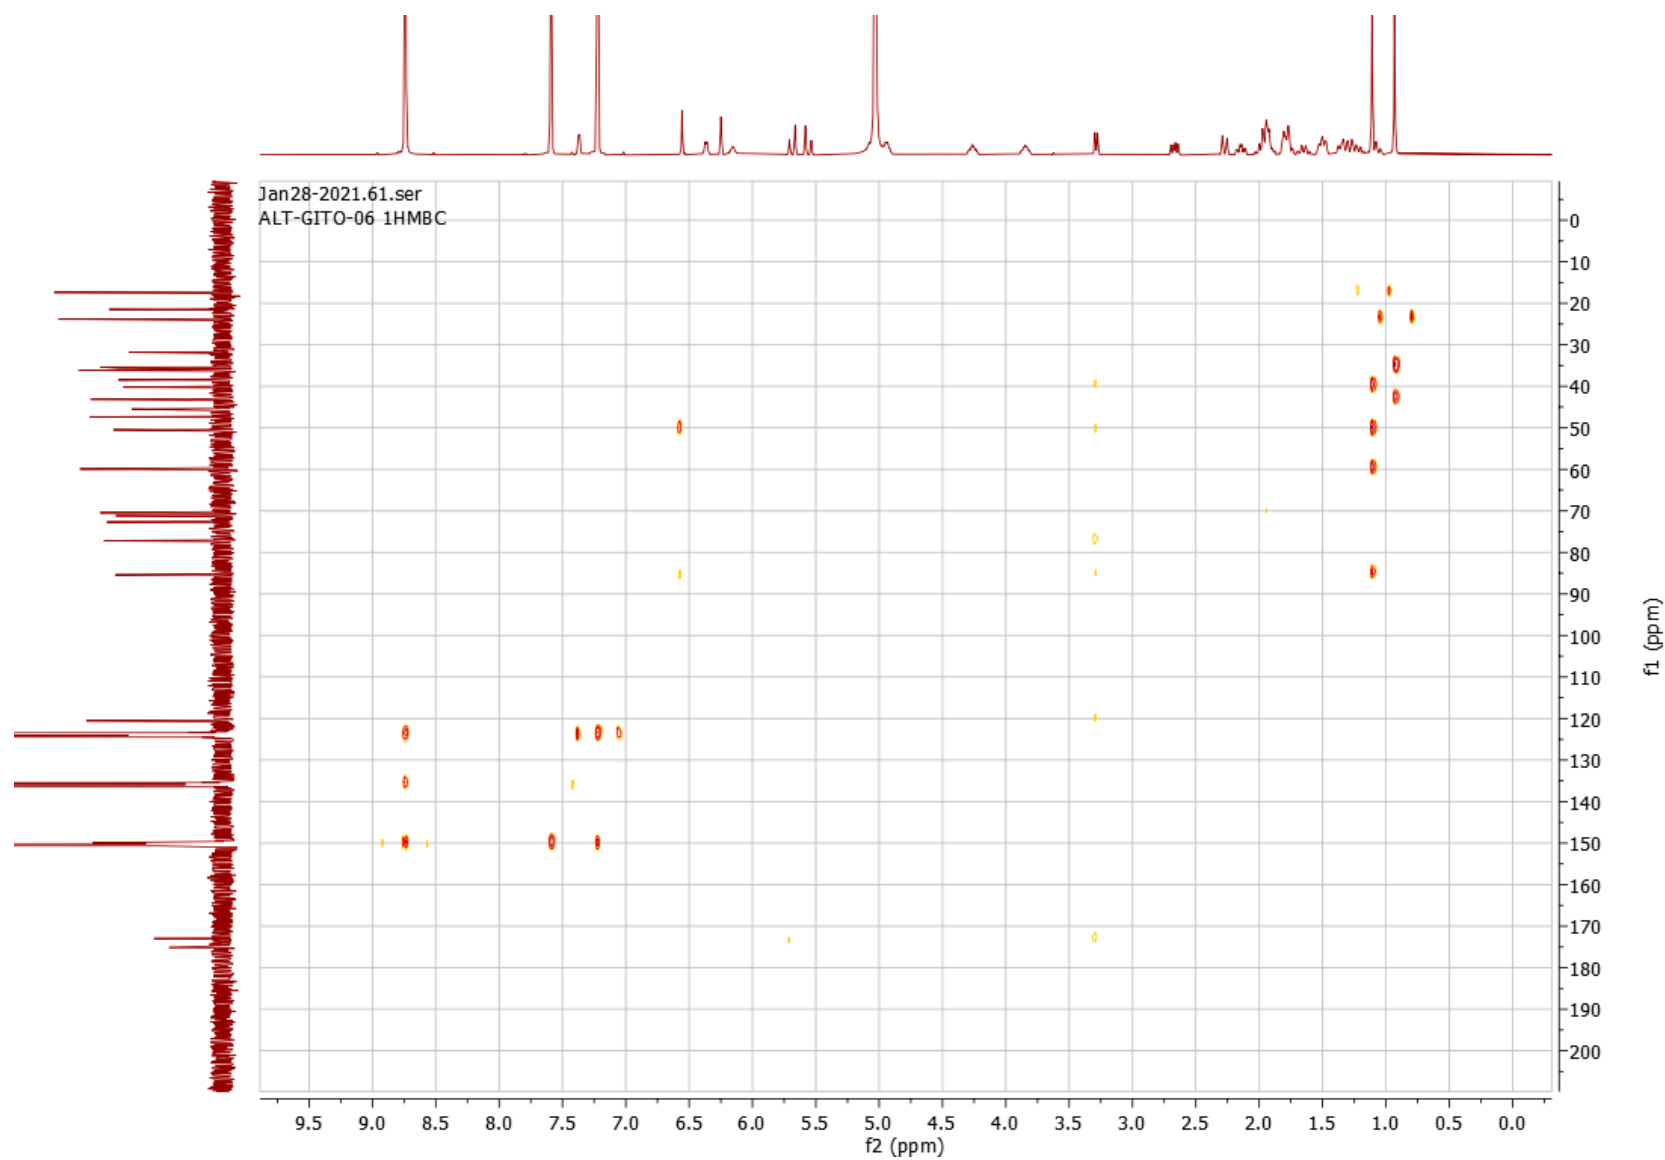

**Figure S62.** HMBC Spectrum of 7( $\beta$ )-hydroxy-3-epi-gitoxigenin (**compound 6**)

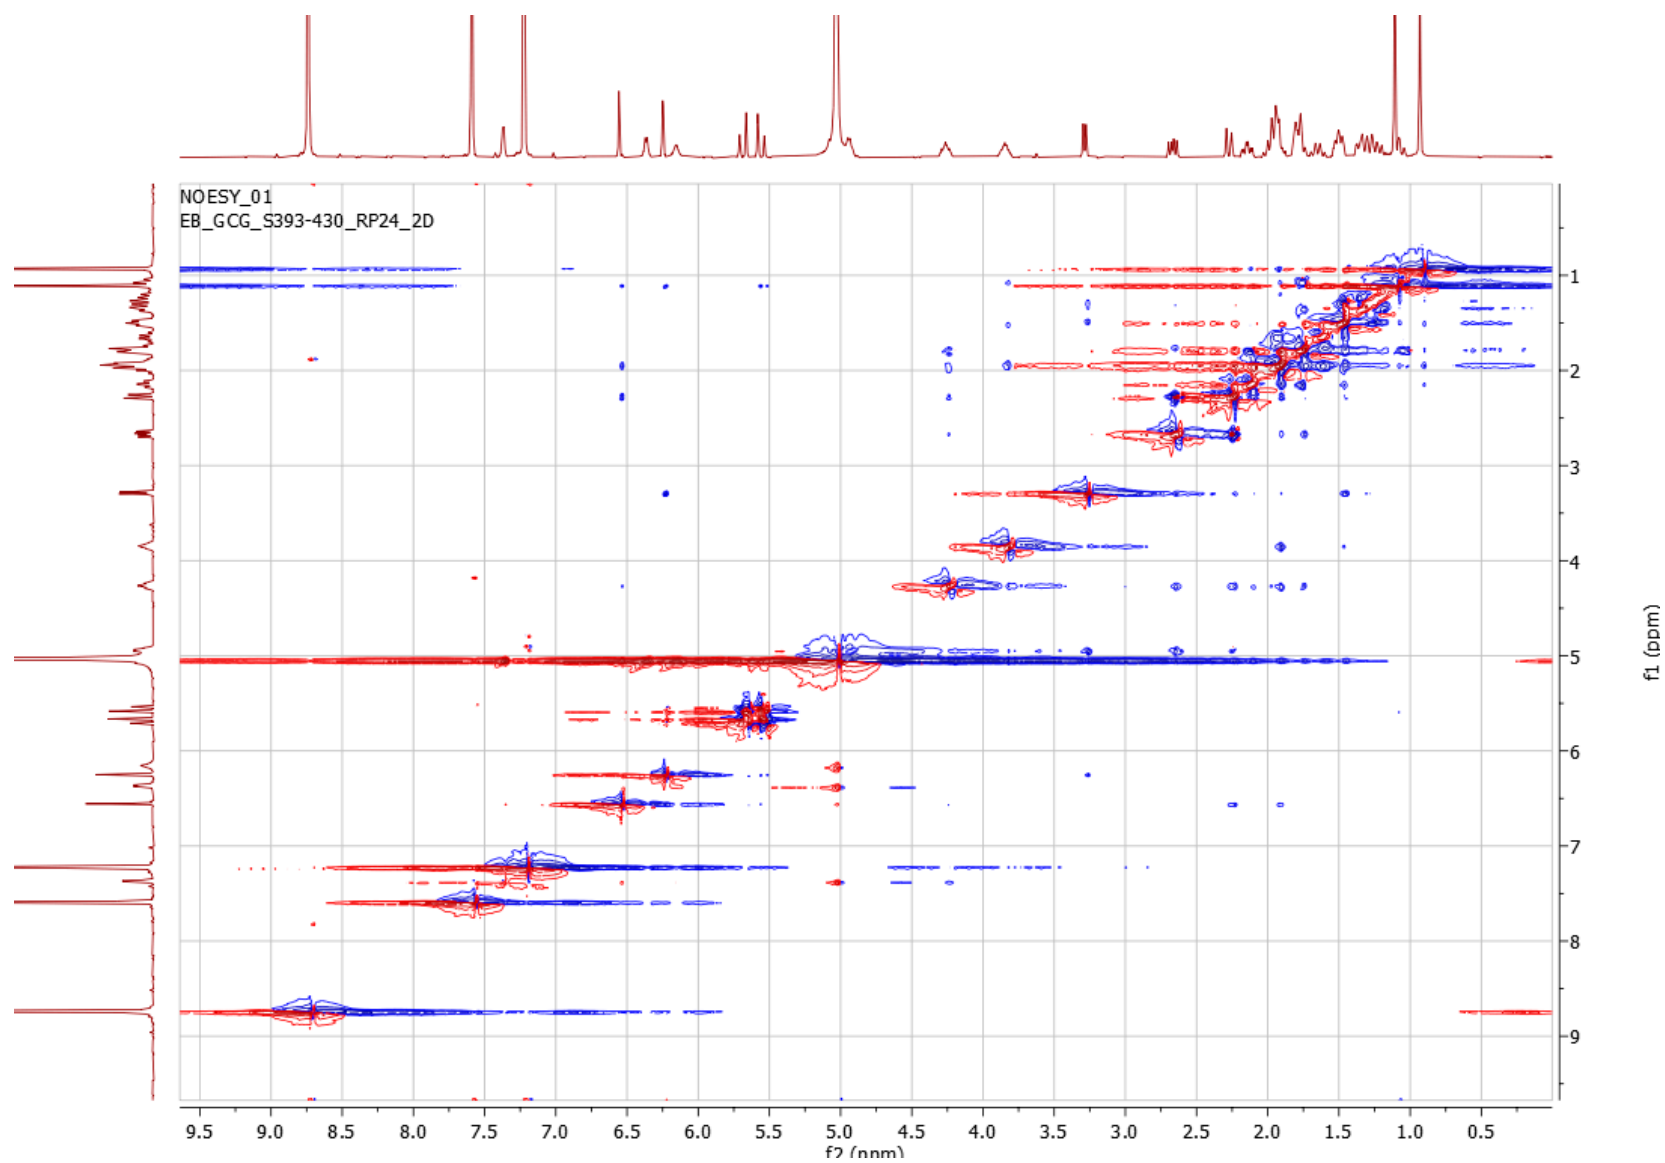

**Figure S63.** NOESY Spectrum of 7( $\beta$ )-hydroxy-3-epi-gitoxigenin (**compound 6**)

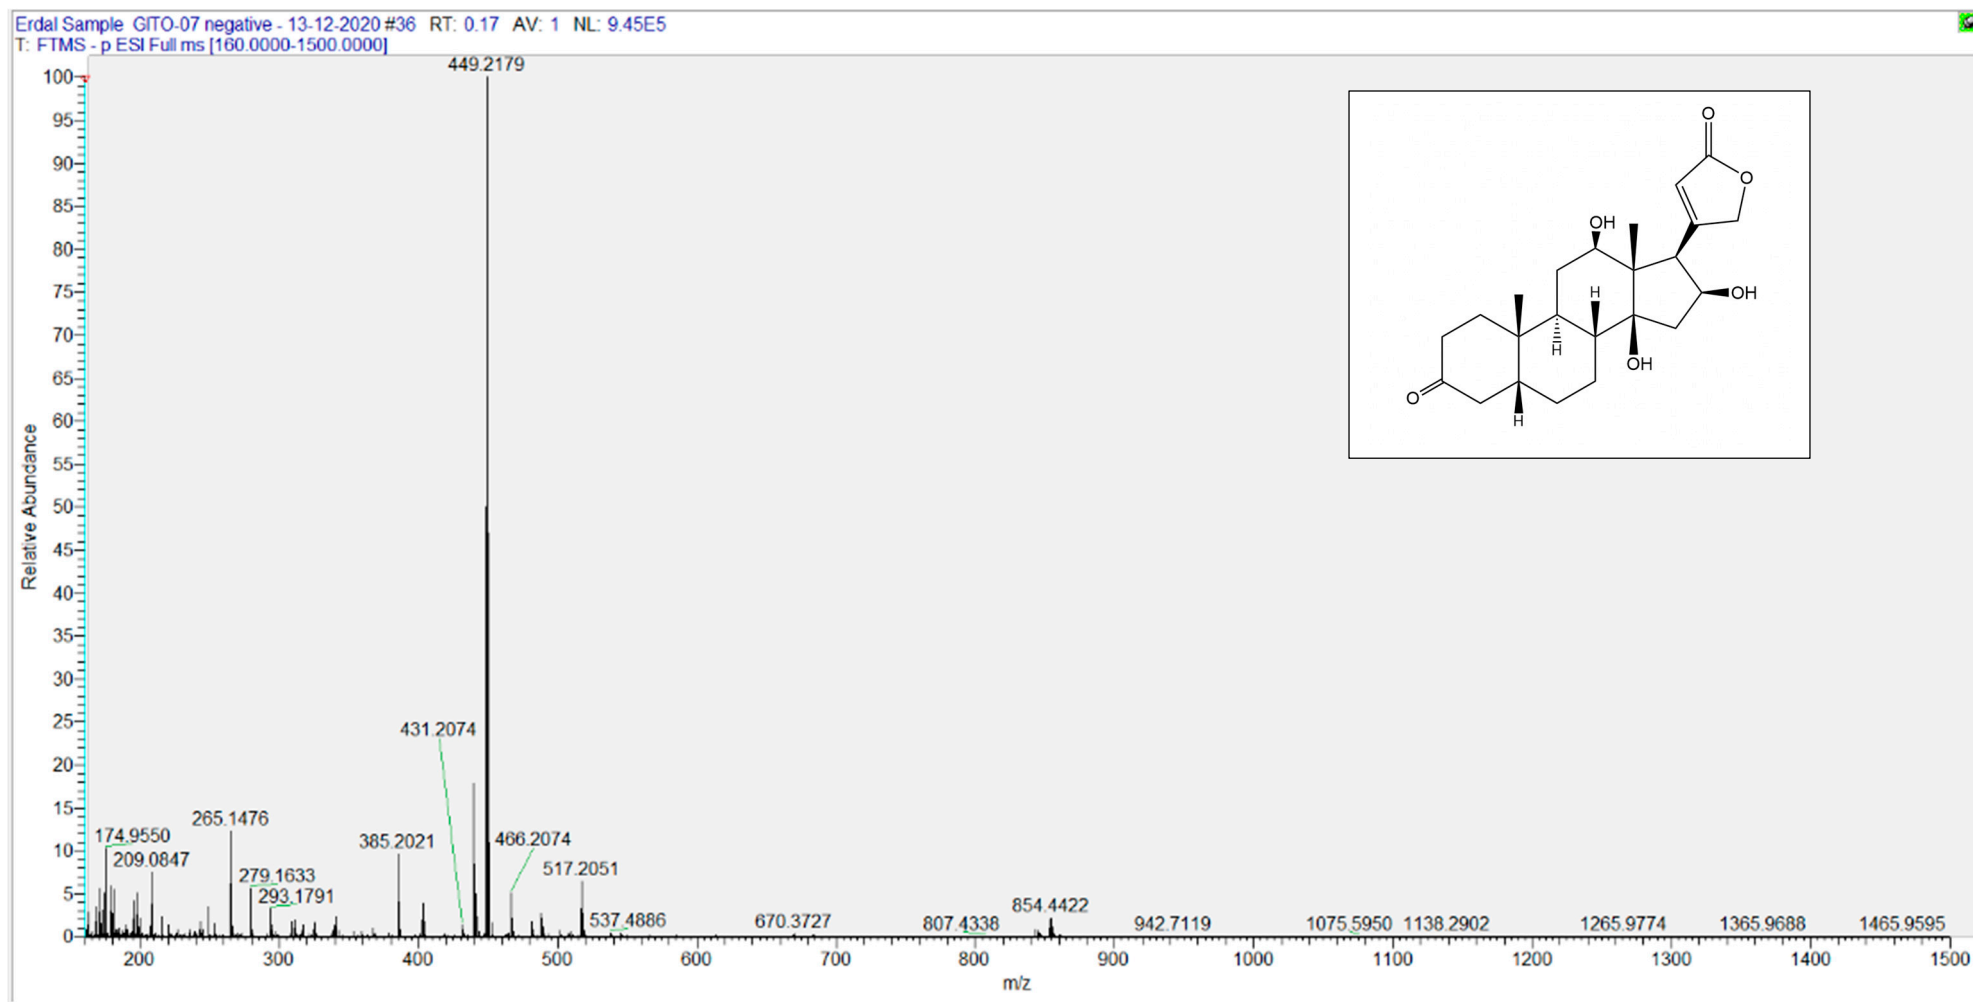

**Figure S64.** Negative-ion mode HR-ESI-MS spectrum of 3-oxo-diginatigenin (**compound 7**)



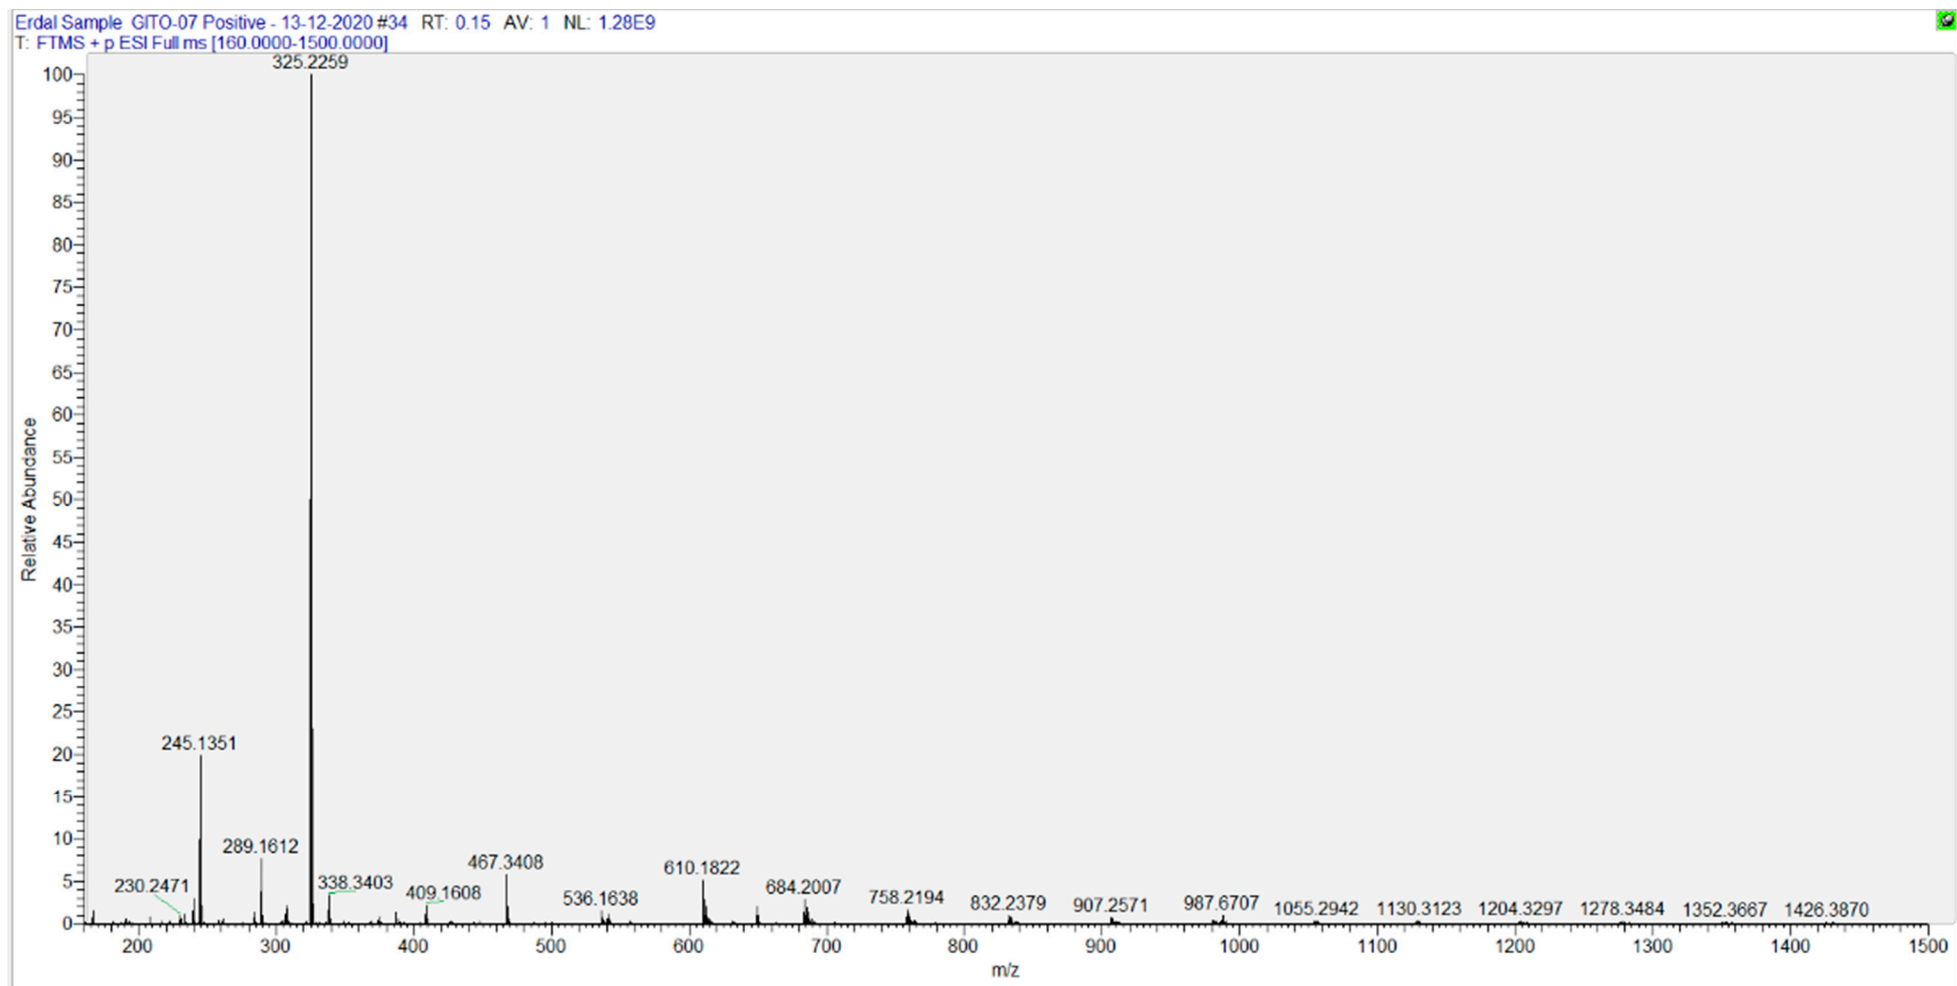

**Figure S65.** Positive-ion mode HR-ESI-MS spectrum of 3-oxo-diginatigenin (**compound 7**)

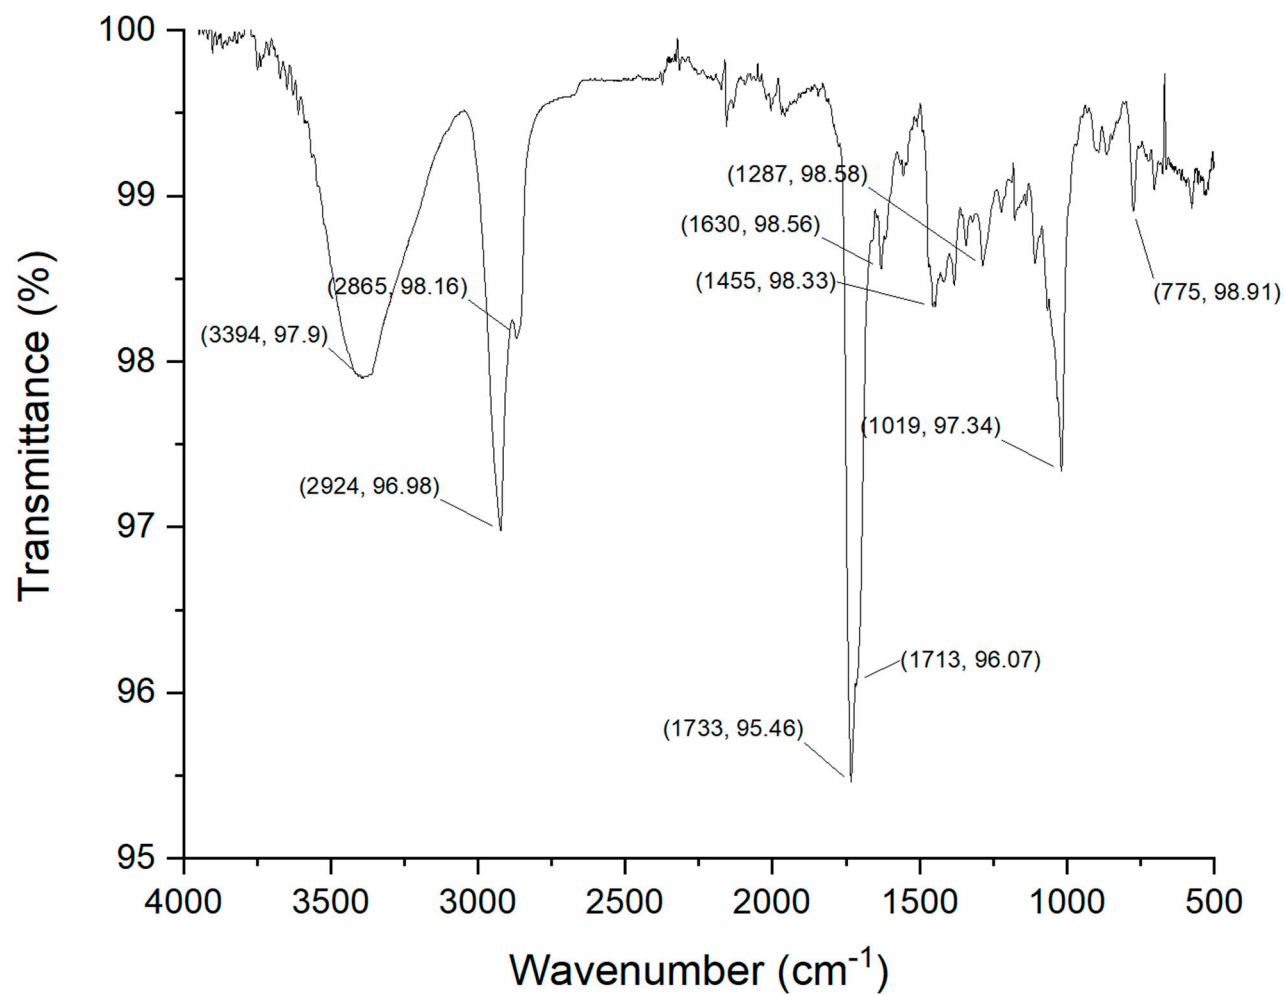

**Figure S66.** FT-IR Spectrum of 3-oxo-diginatigenin (**compound 7**)

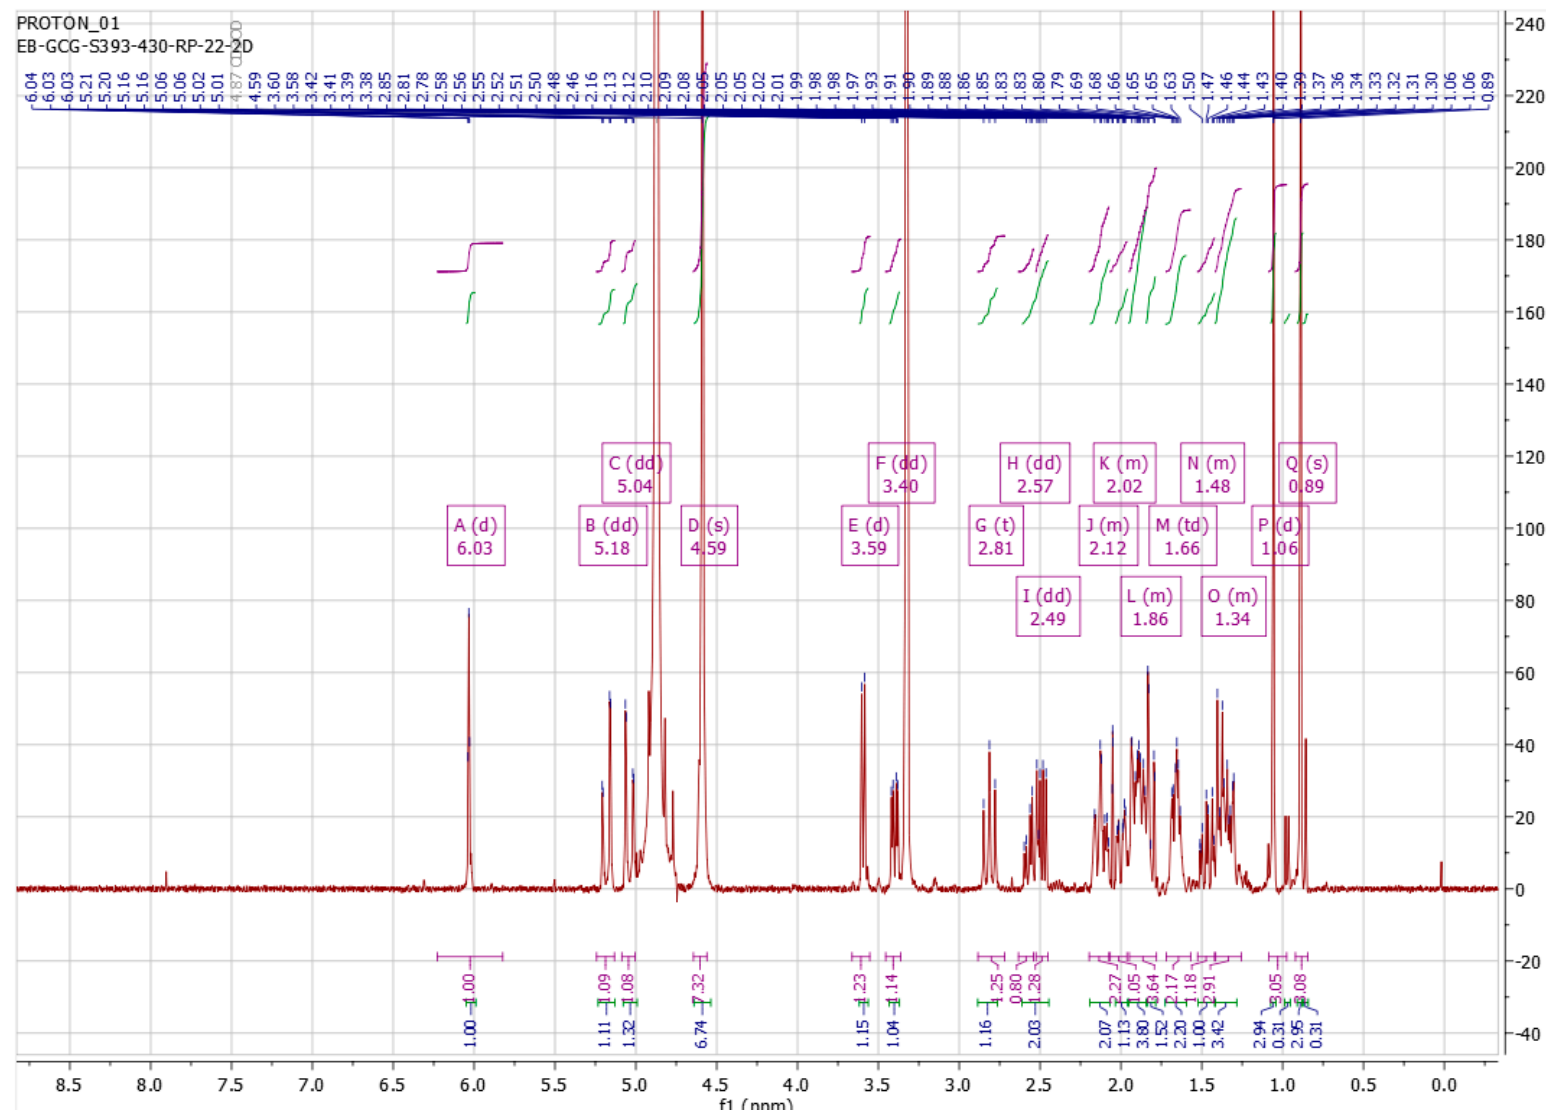

Figure S67.  $^1\text{H}$  NMR Spectrum of 3-oxo-diginatigenin (compound 7)

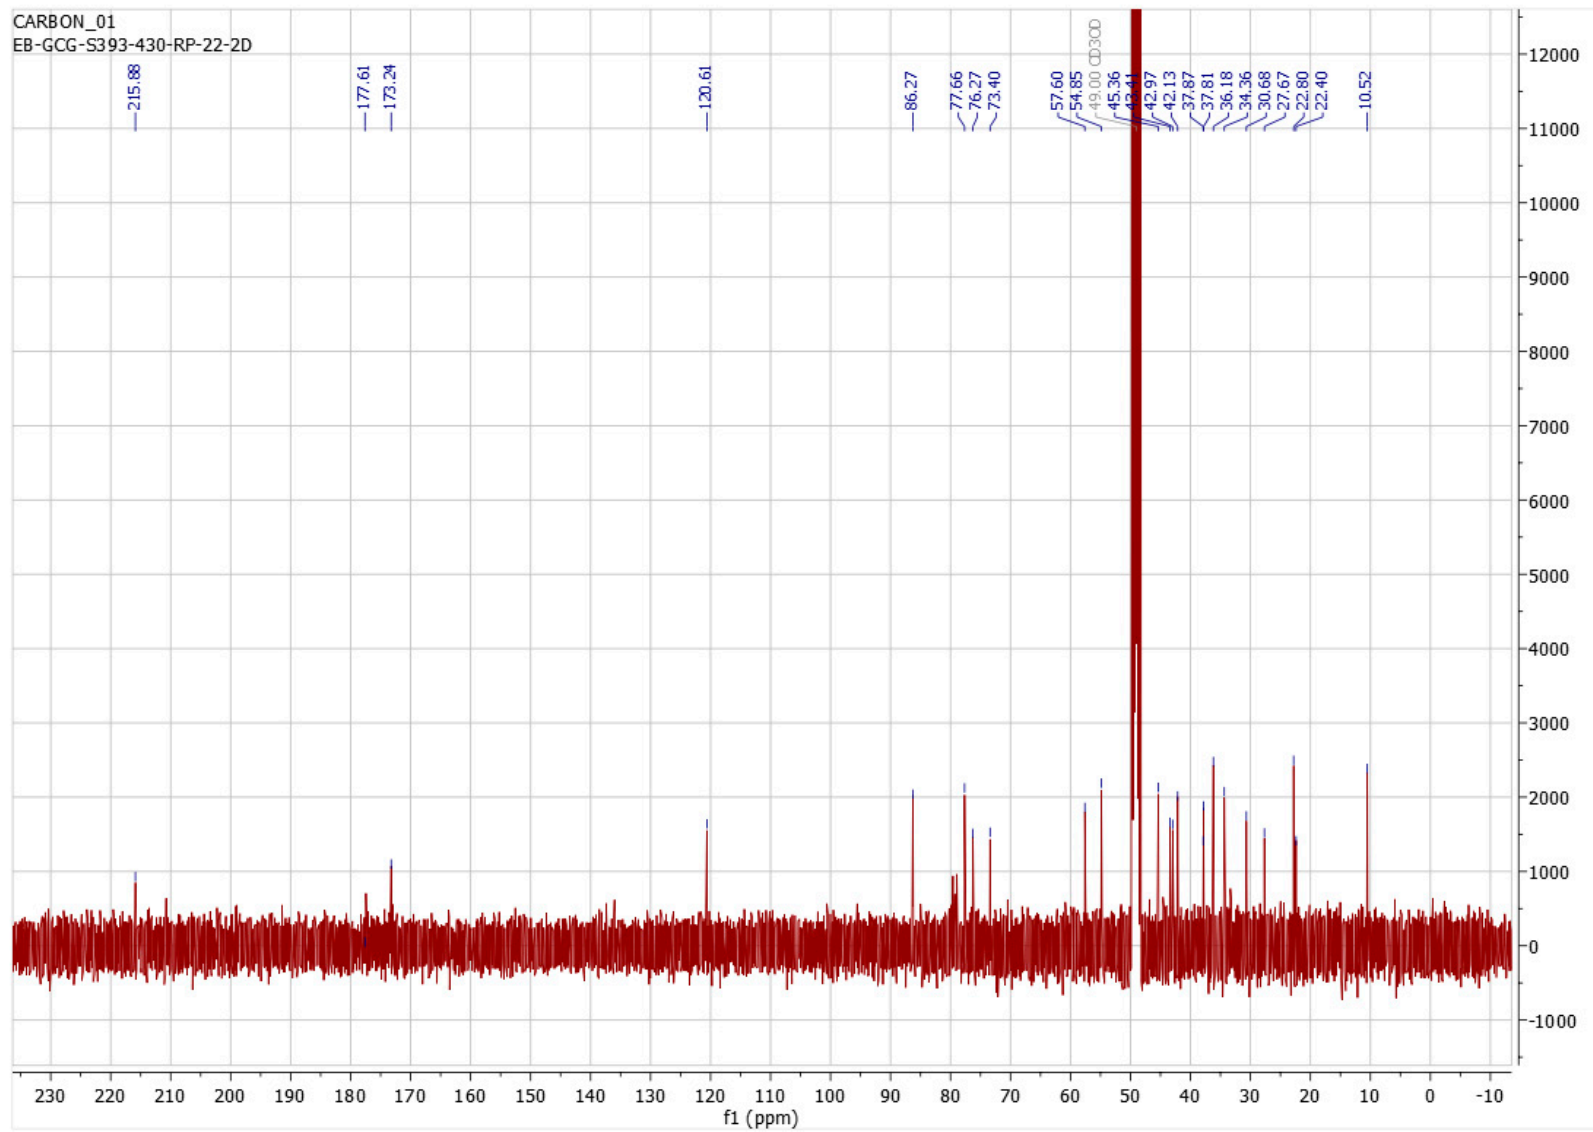

**Figure S68.**  $^{13}\text{C}$  NMR Spectrum of 3-oxo-diginatigenin (**compound 7**)

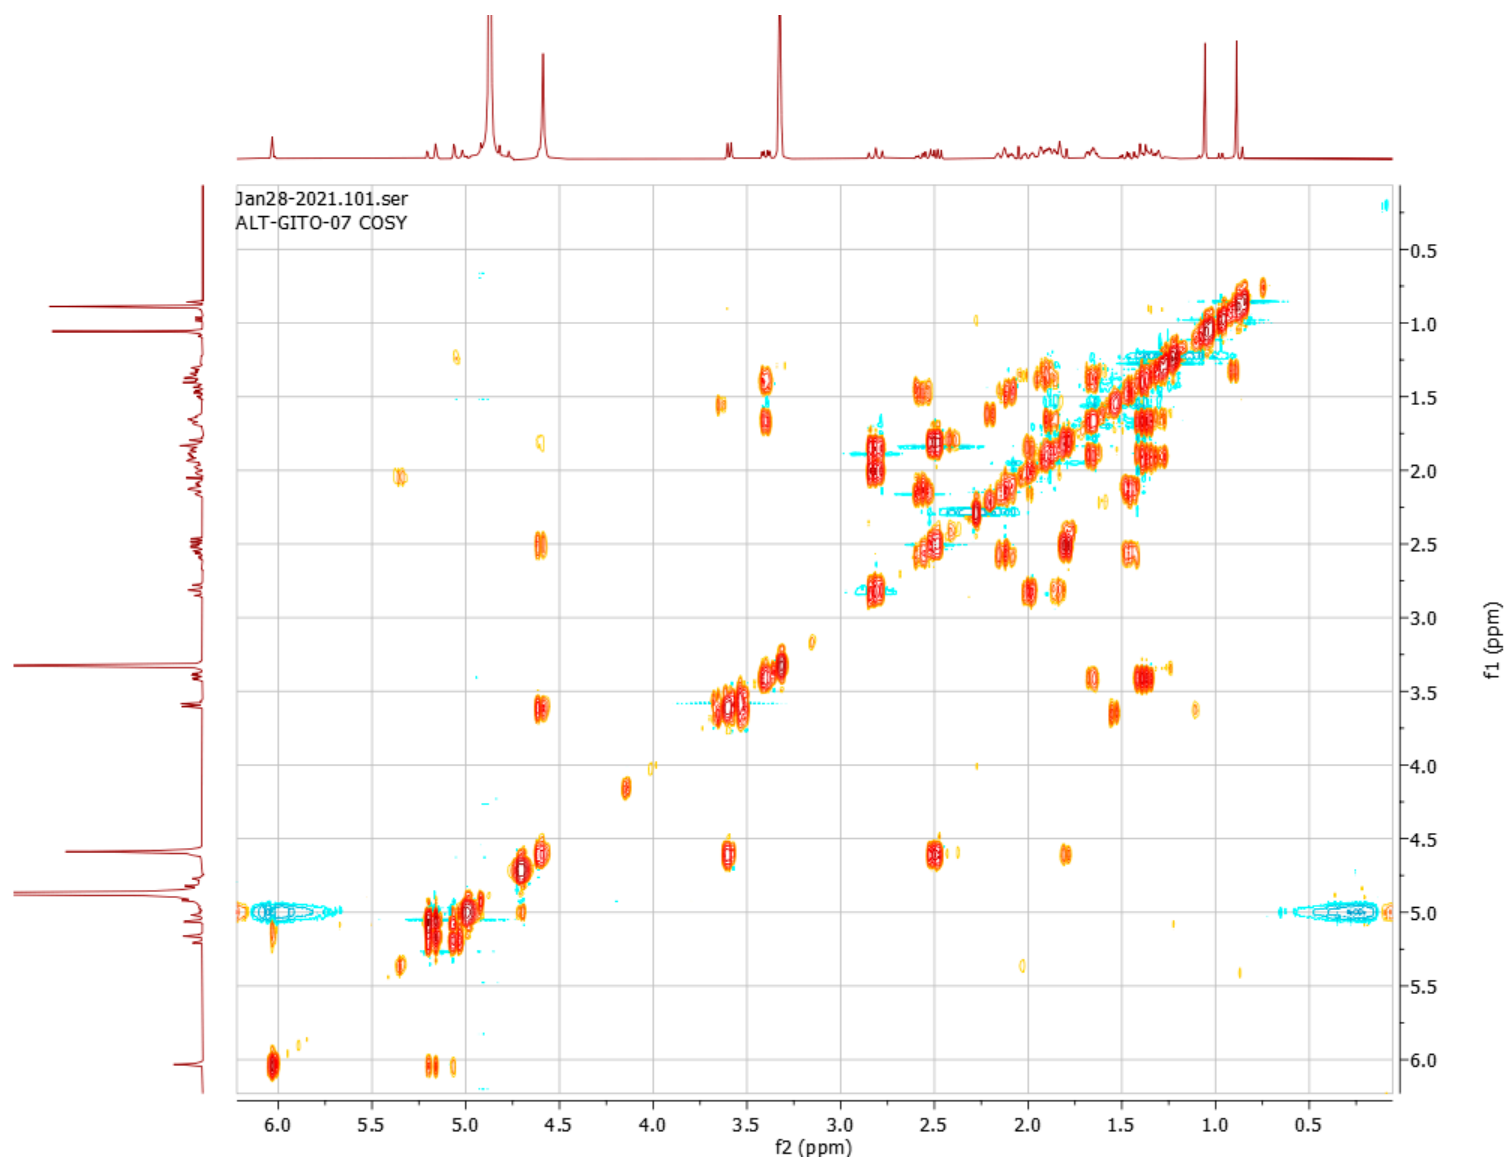

**Figure S69.** COSY Spectrum of 3-oxo-diginatigenin (**compound 7**)

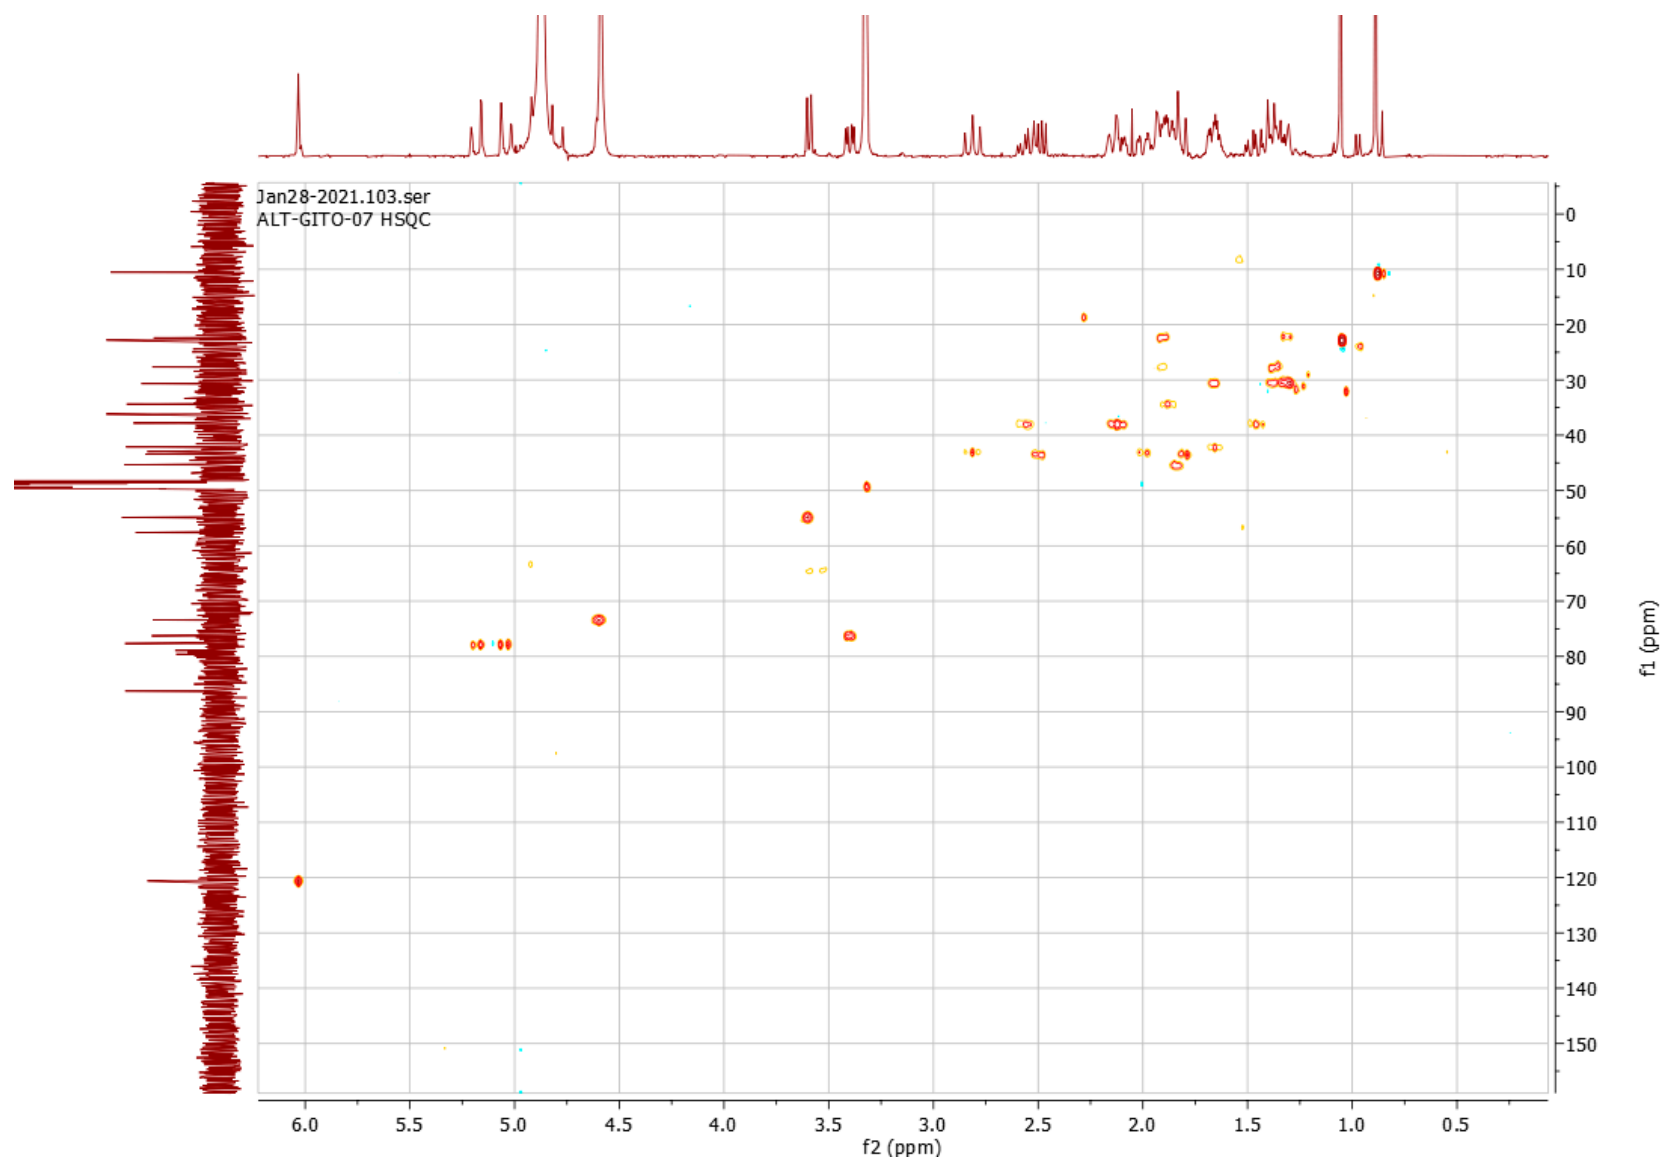

**Figure S70.** HSQC Spectrum of 3-oxo-diginatigenin (**compound 7**)

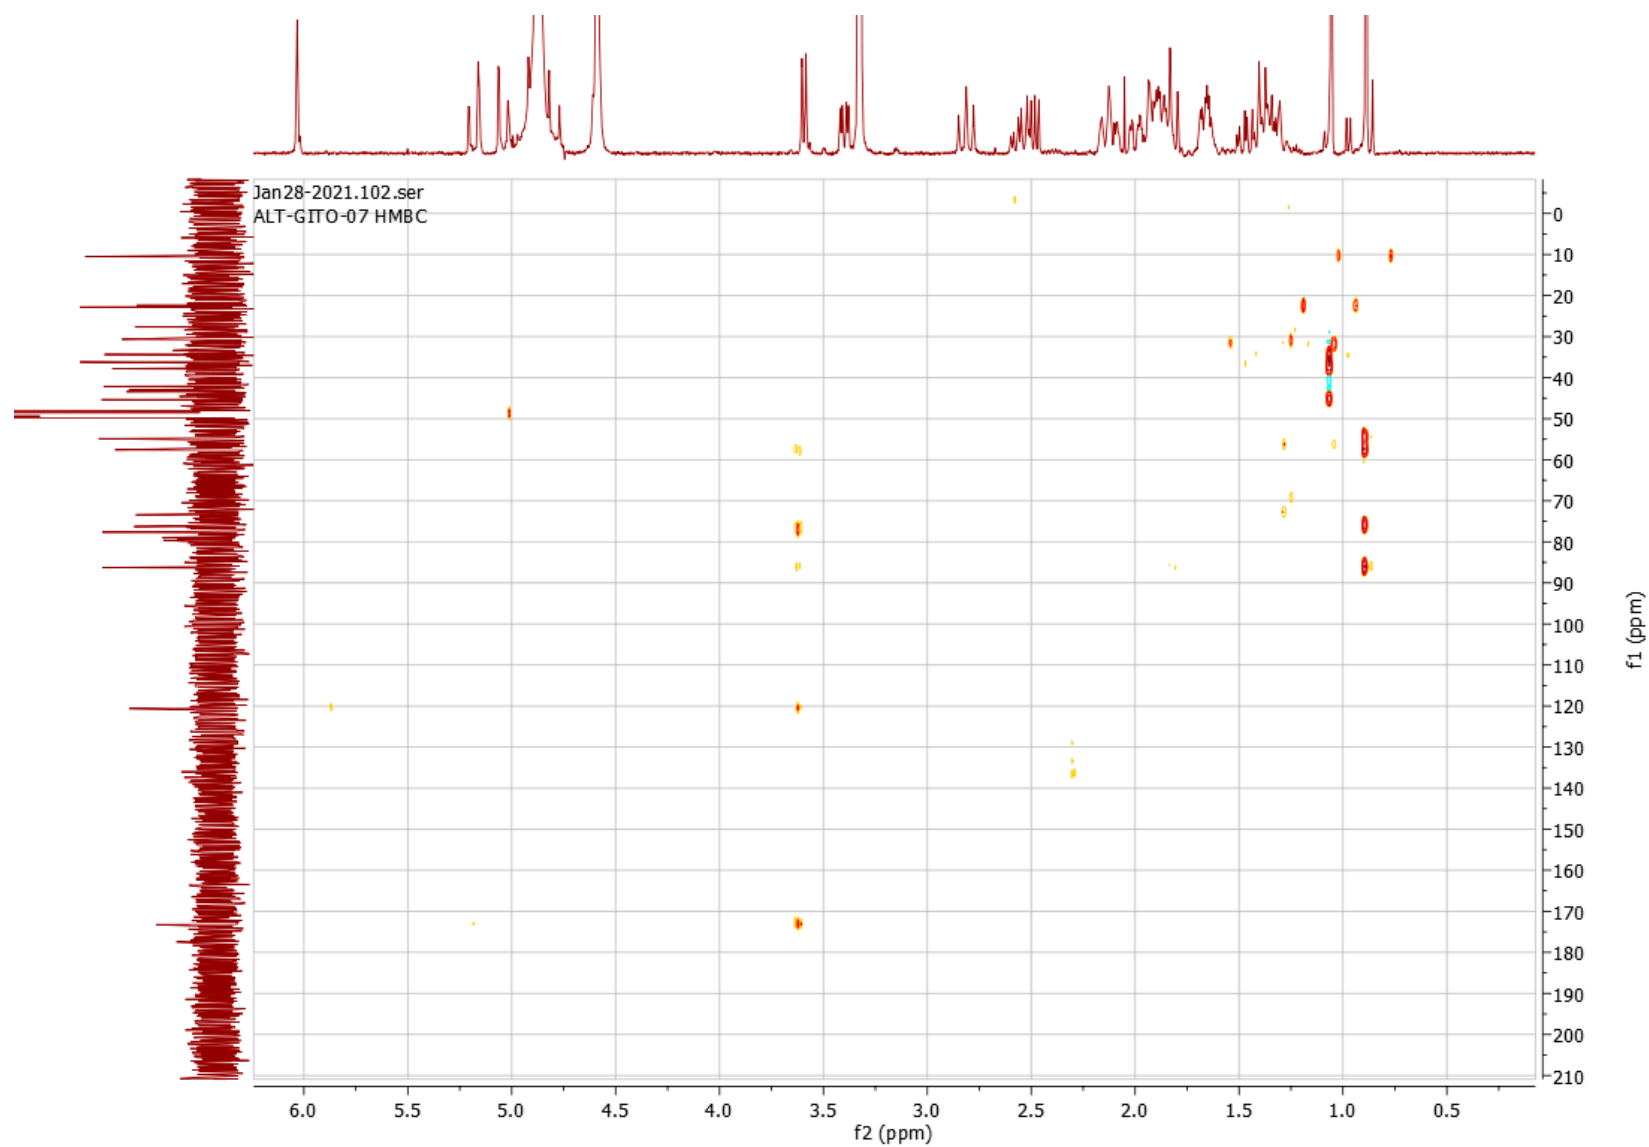

**Figure S71.** HMBC Spectrum of 3-oxo-diginatigenin (**compound 7**)

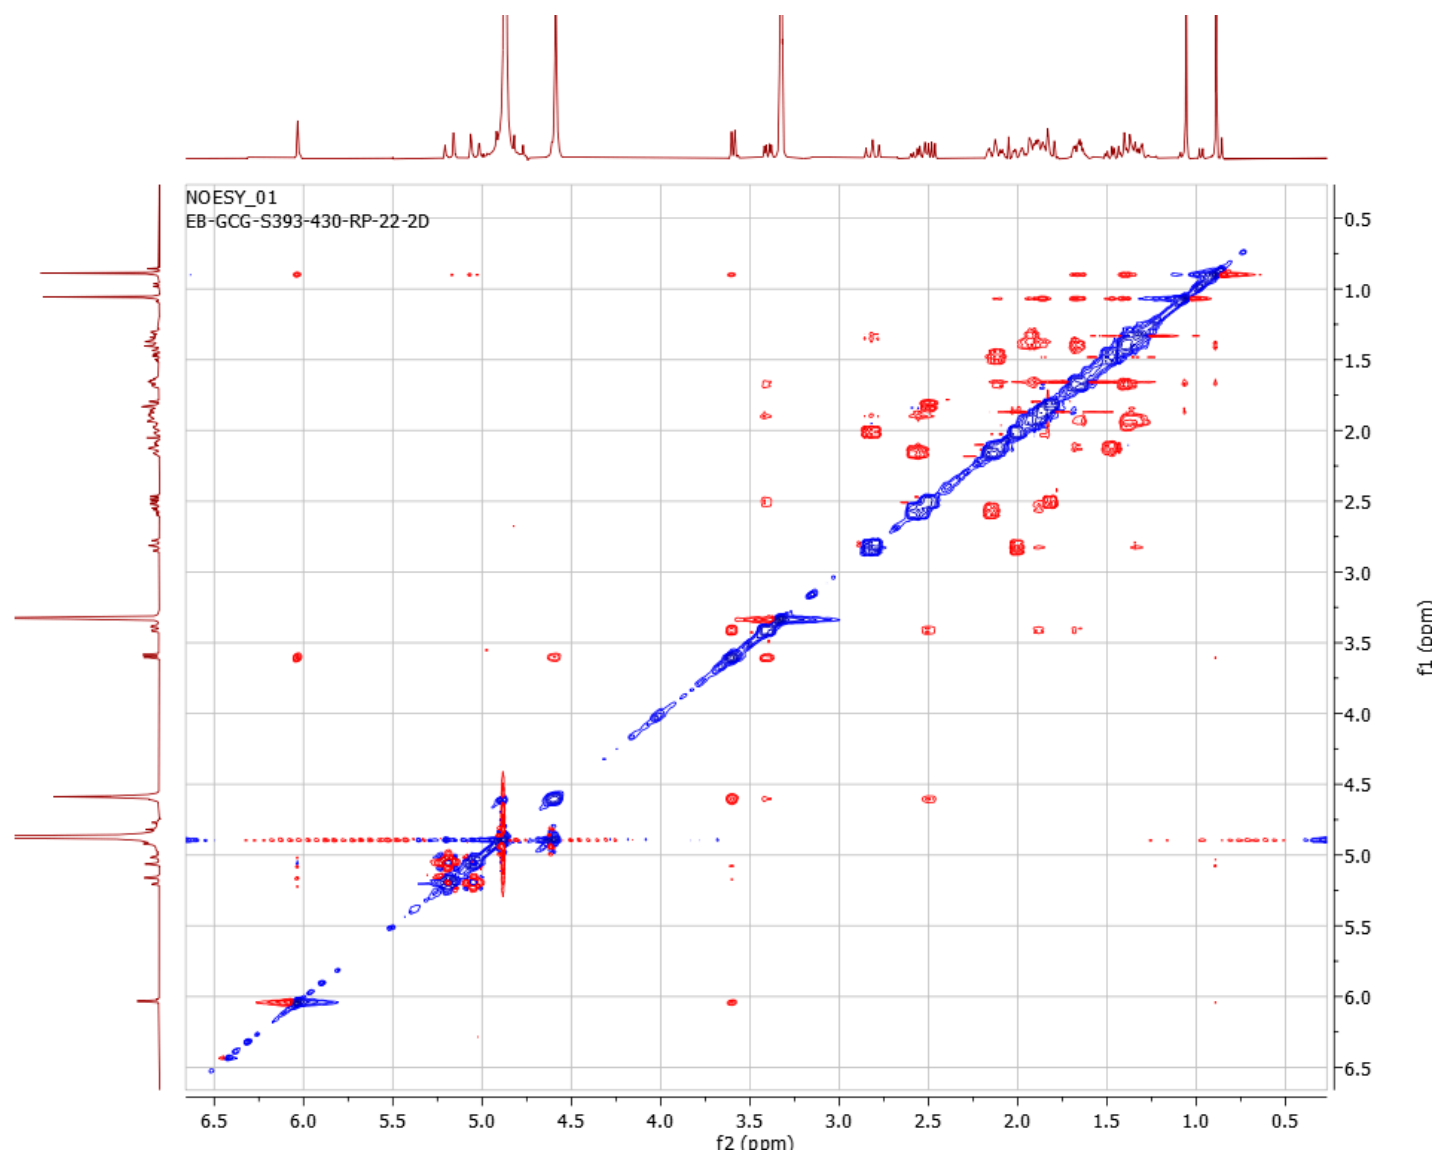

**Figure S72.** NOESY Spectrum of 3-oxo-diginatigenin (compound 7)



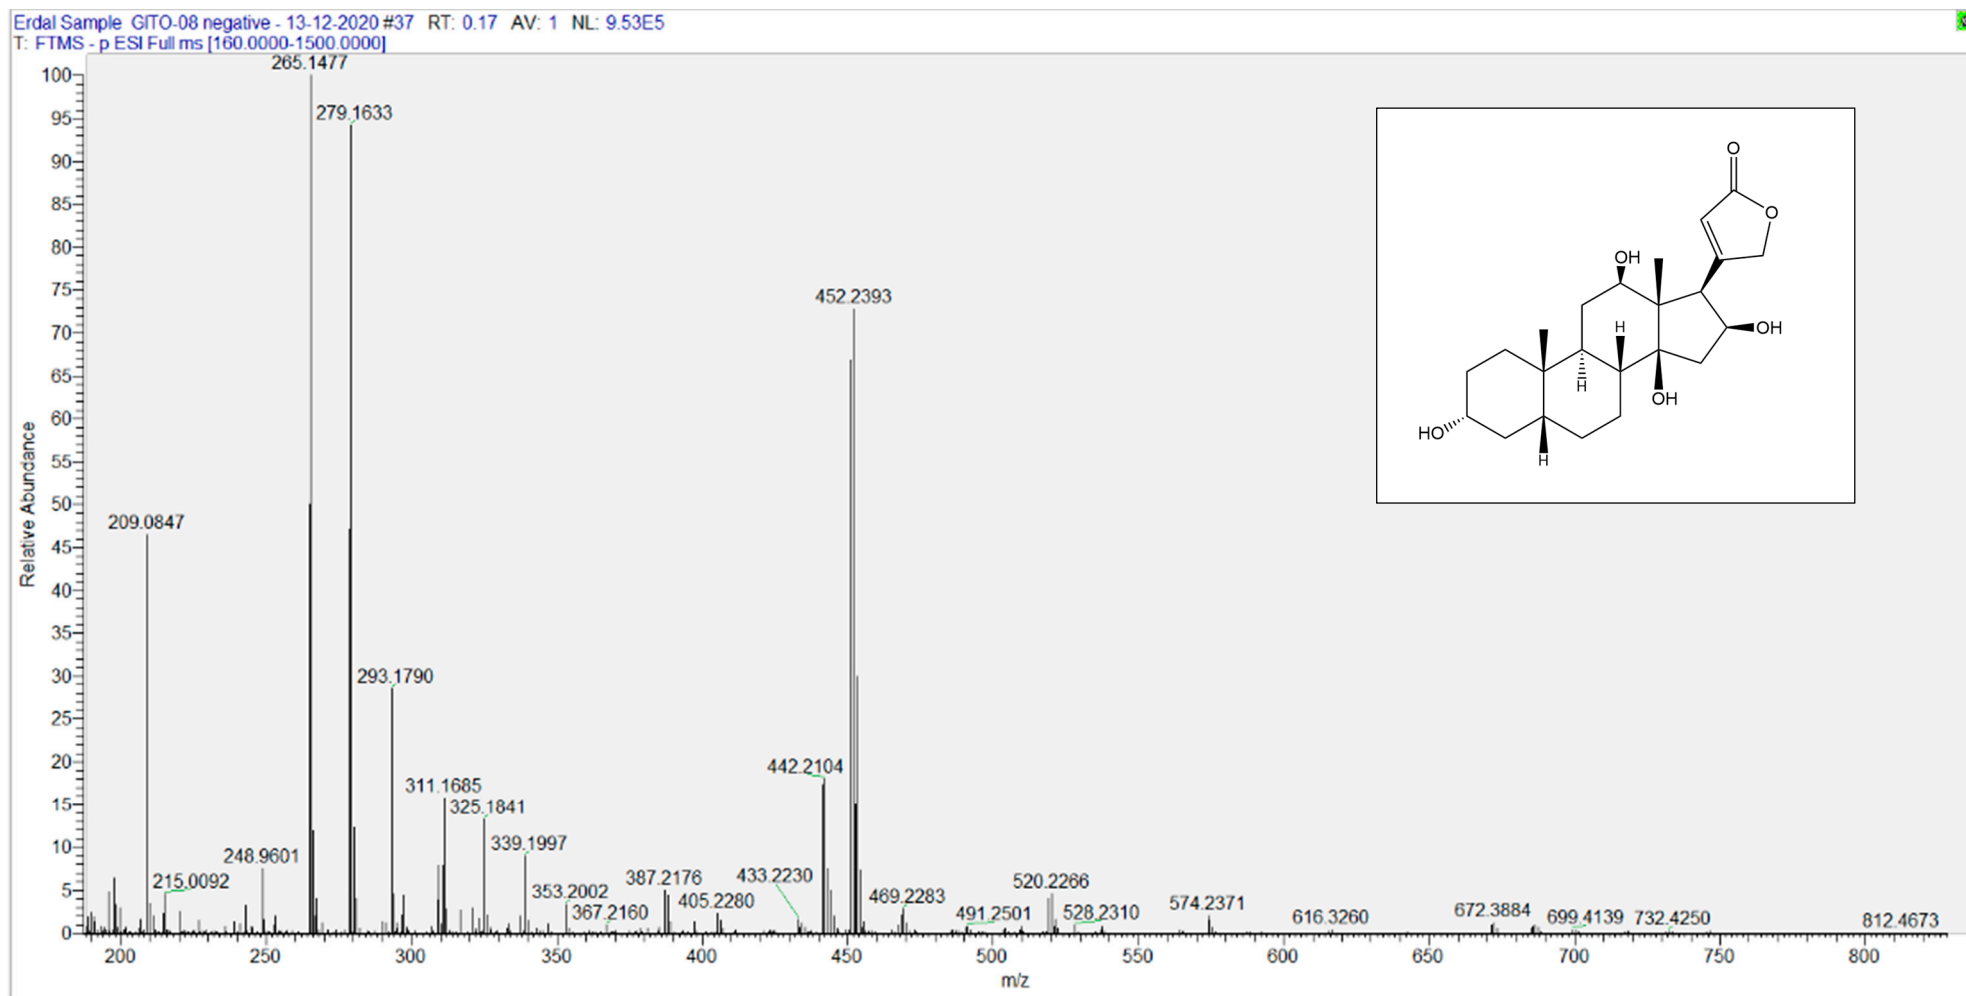

**Figure S73.** Negative-ion mode HR-ESI-MS spectrum of 3-epi-diginatigenin (**compound 8**)

Erdal Sample GITO-08 Positive - 13-12-2020 #44 RT: 0.19 AV: 1 NL: 4.91E8  
T: FTMS + p ESI Full ms [160.0000-1500.0000]

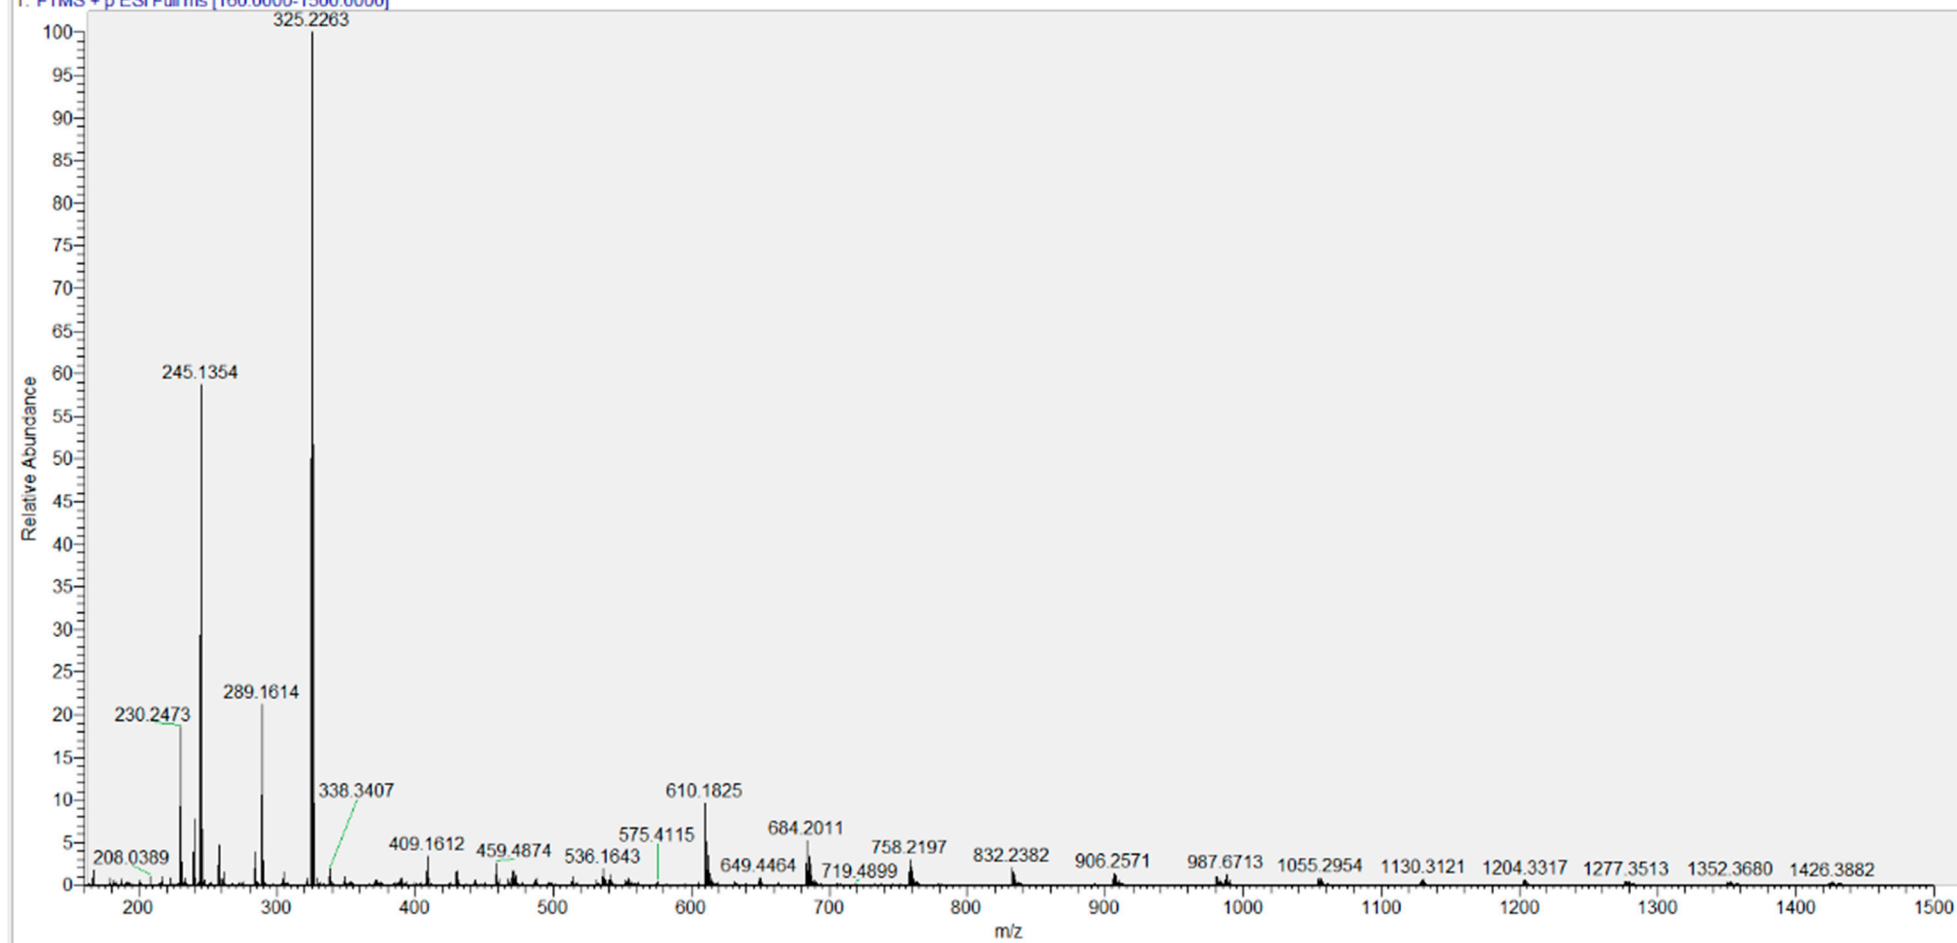

**Figure S74.** Positive-ion mode HR-ESI-MS spectrum of 3-epi-diginatigenin (**compound 8**)

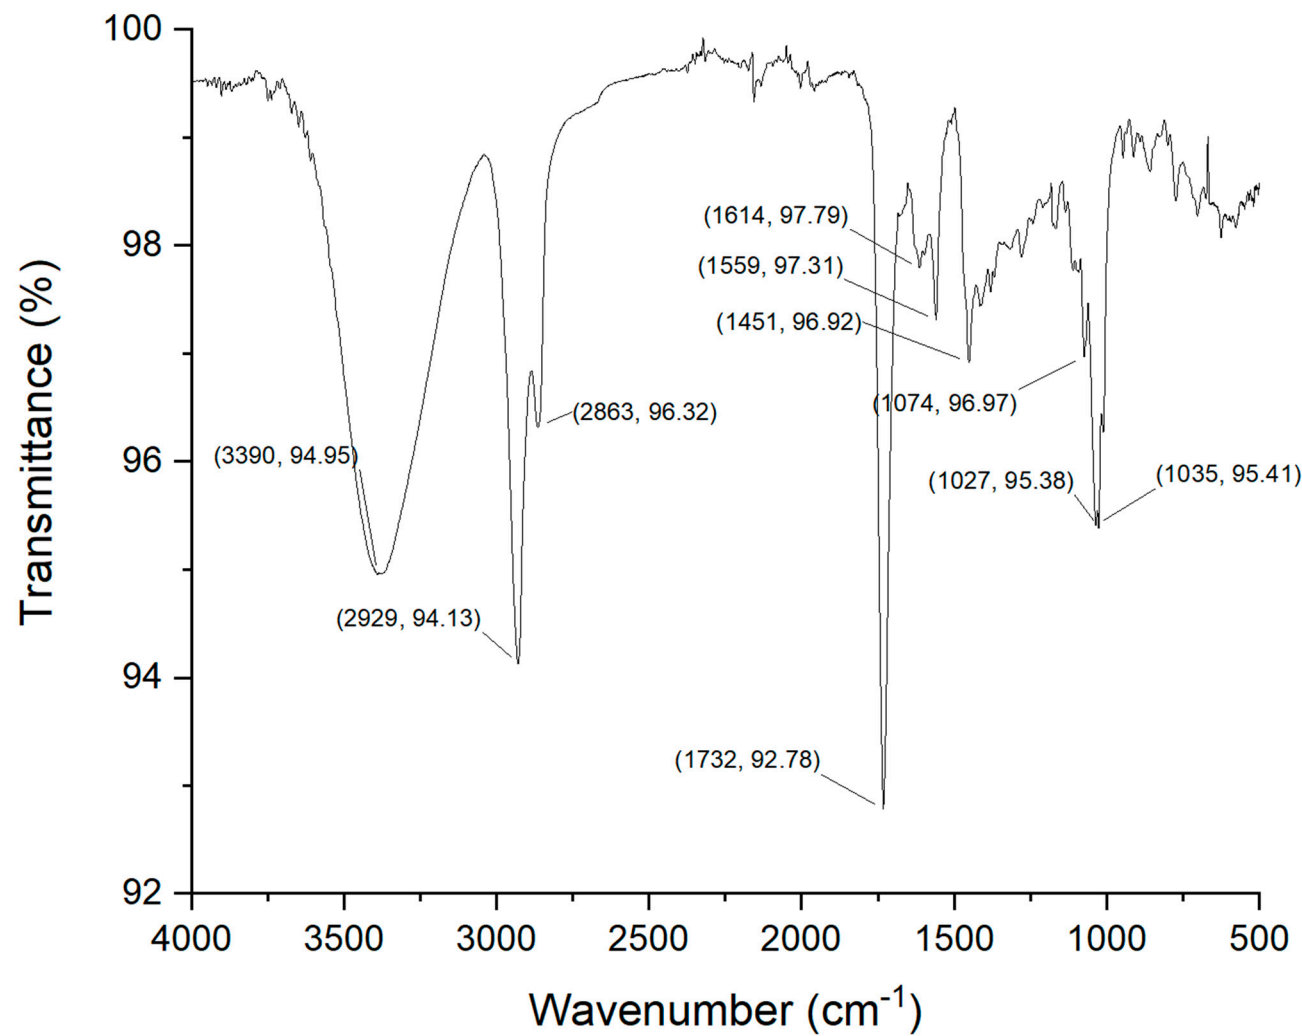

**Figure S75.** FT-IR Spectrum of 3-epi-diginatigenin (**compound 8**)

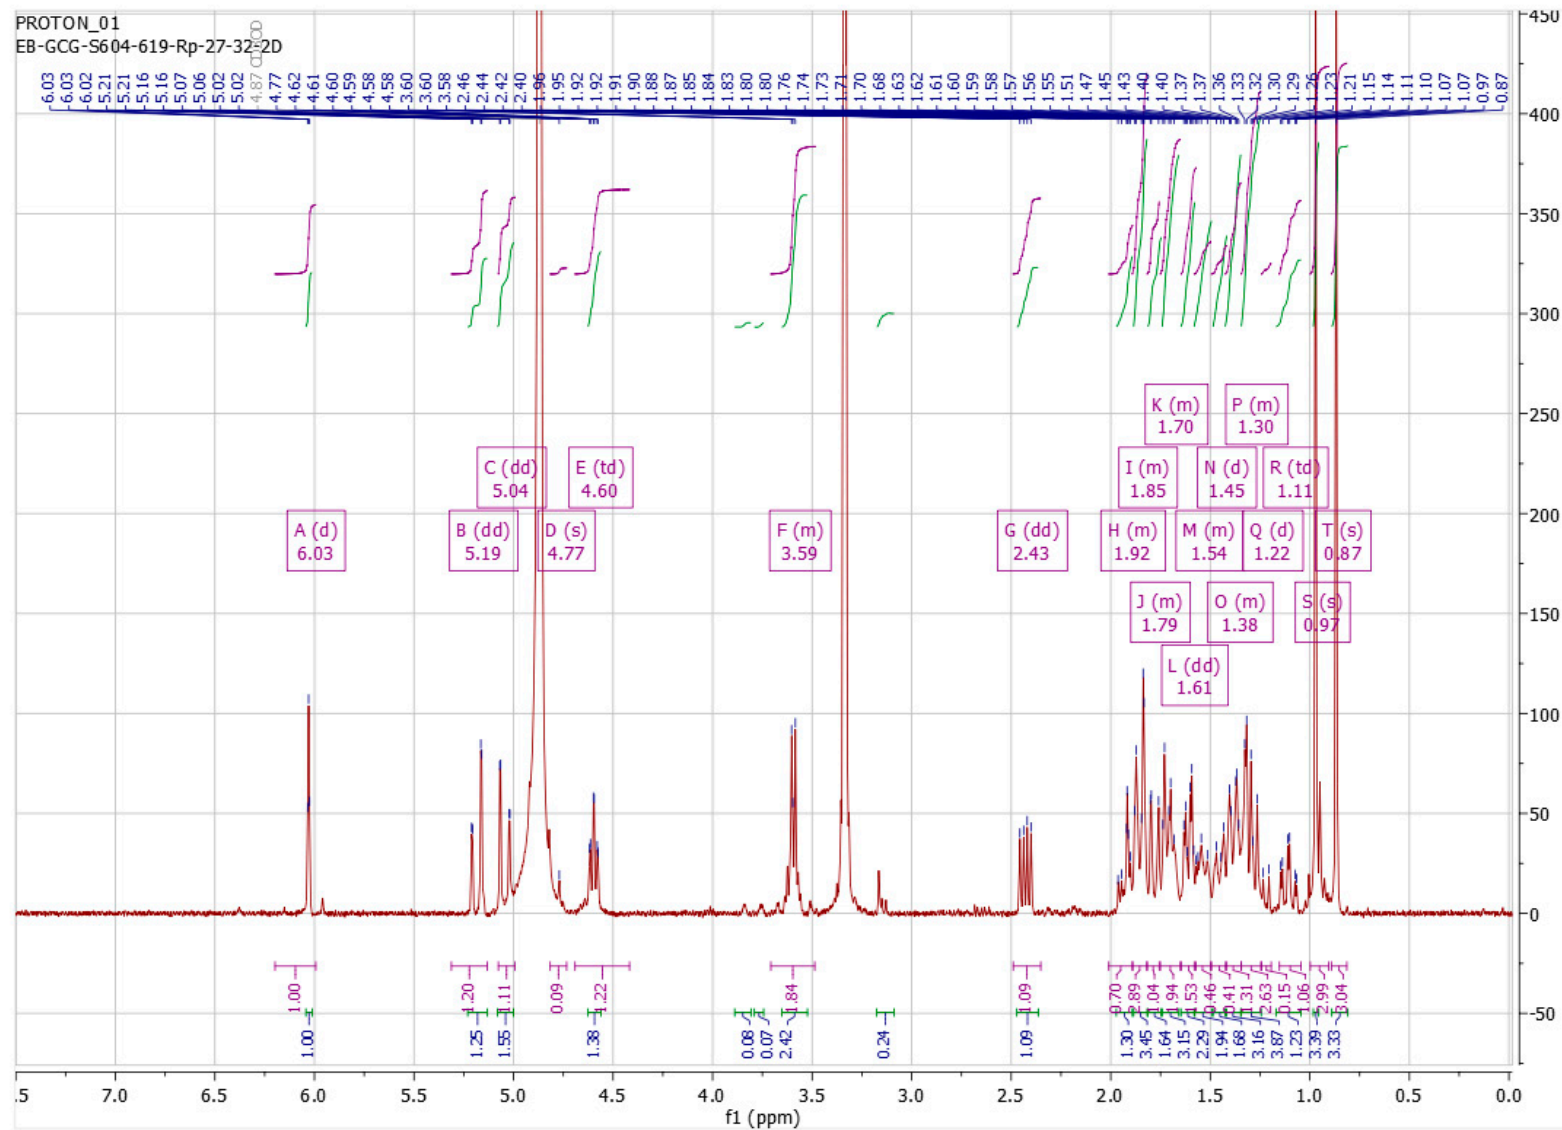

Figure S76.  $^1\text{H}$  NMR Spectrum of 3-epi-diginatigenin (**compound 8**)

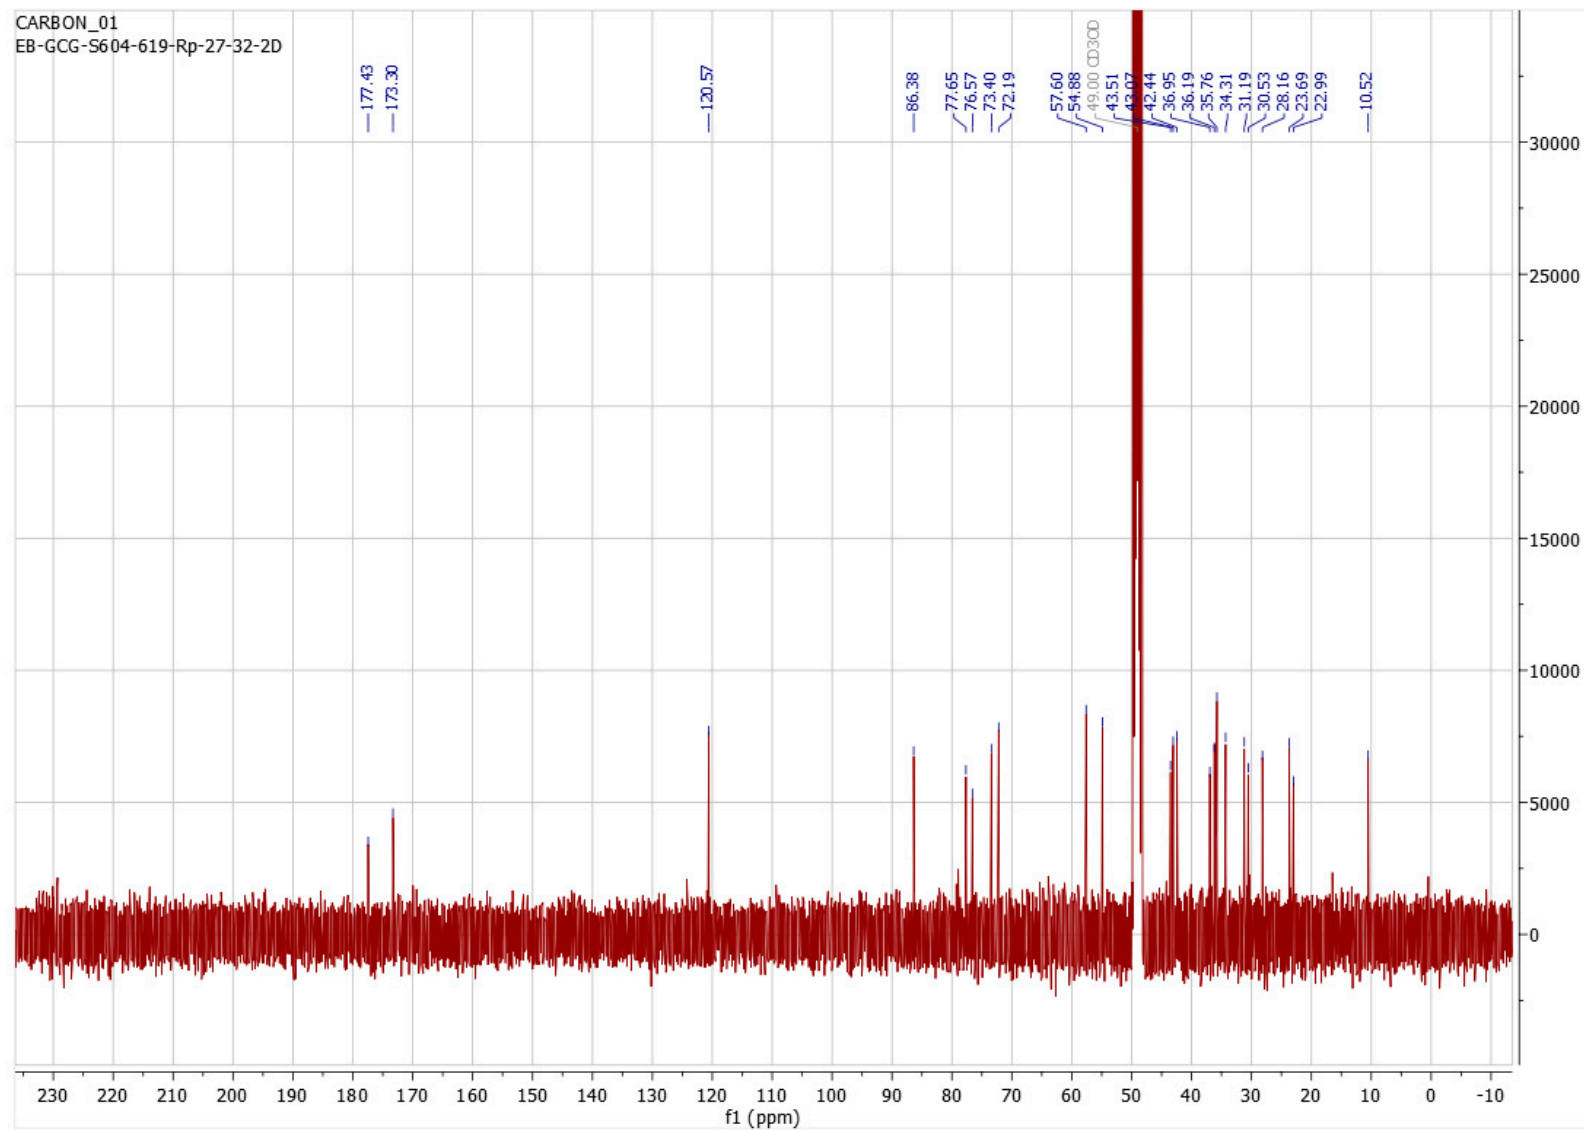

**Figure S77.**  $^{13}\text{C}$  NMR Spectrum of 3-epi-diginatigenin (**compound 8**)

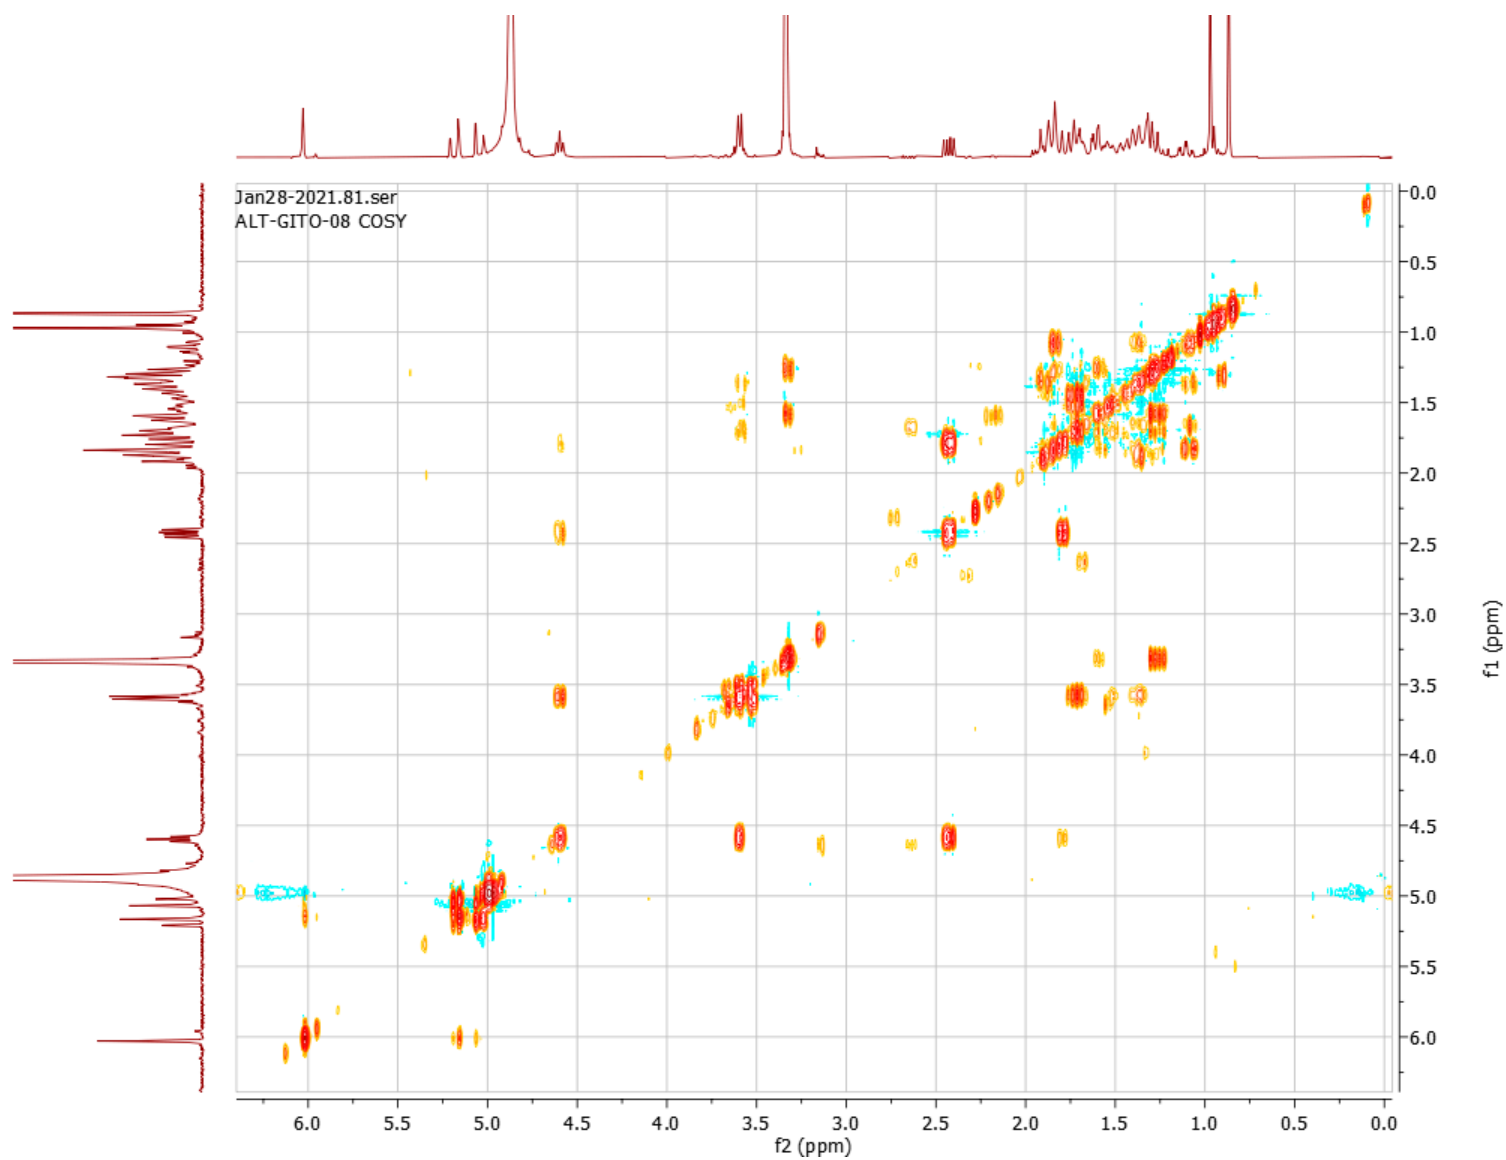

**Figure S78.** COSY Spectrum of 3-epi-diginatigenin (**compound 8**)

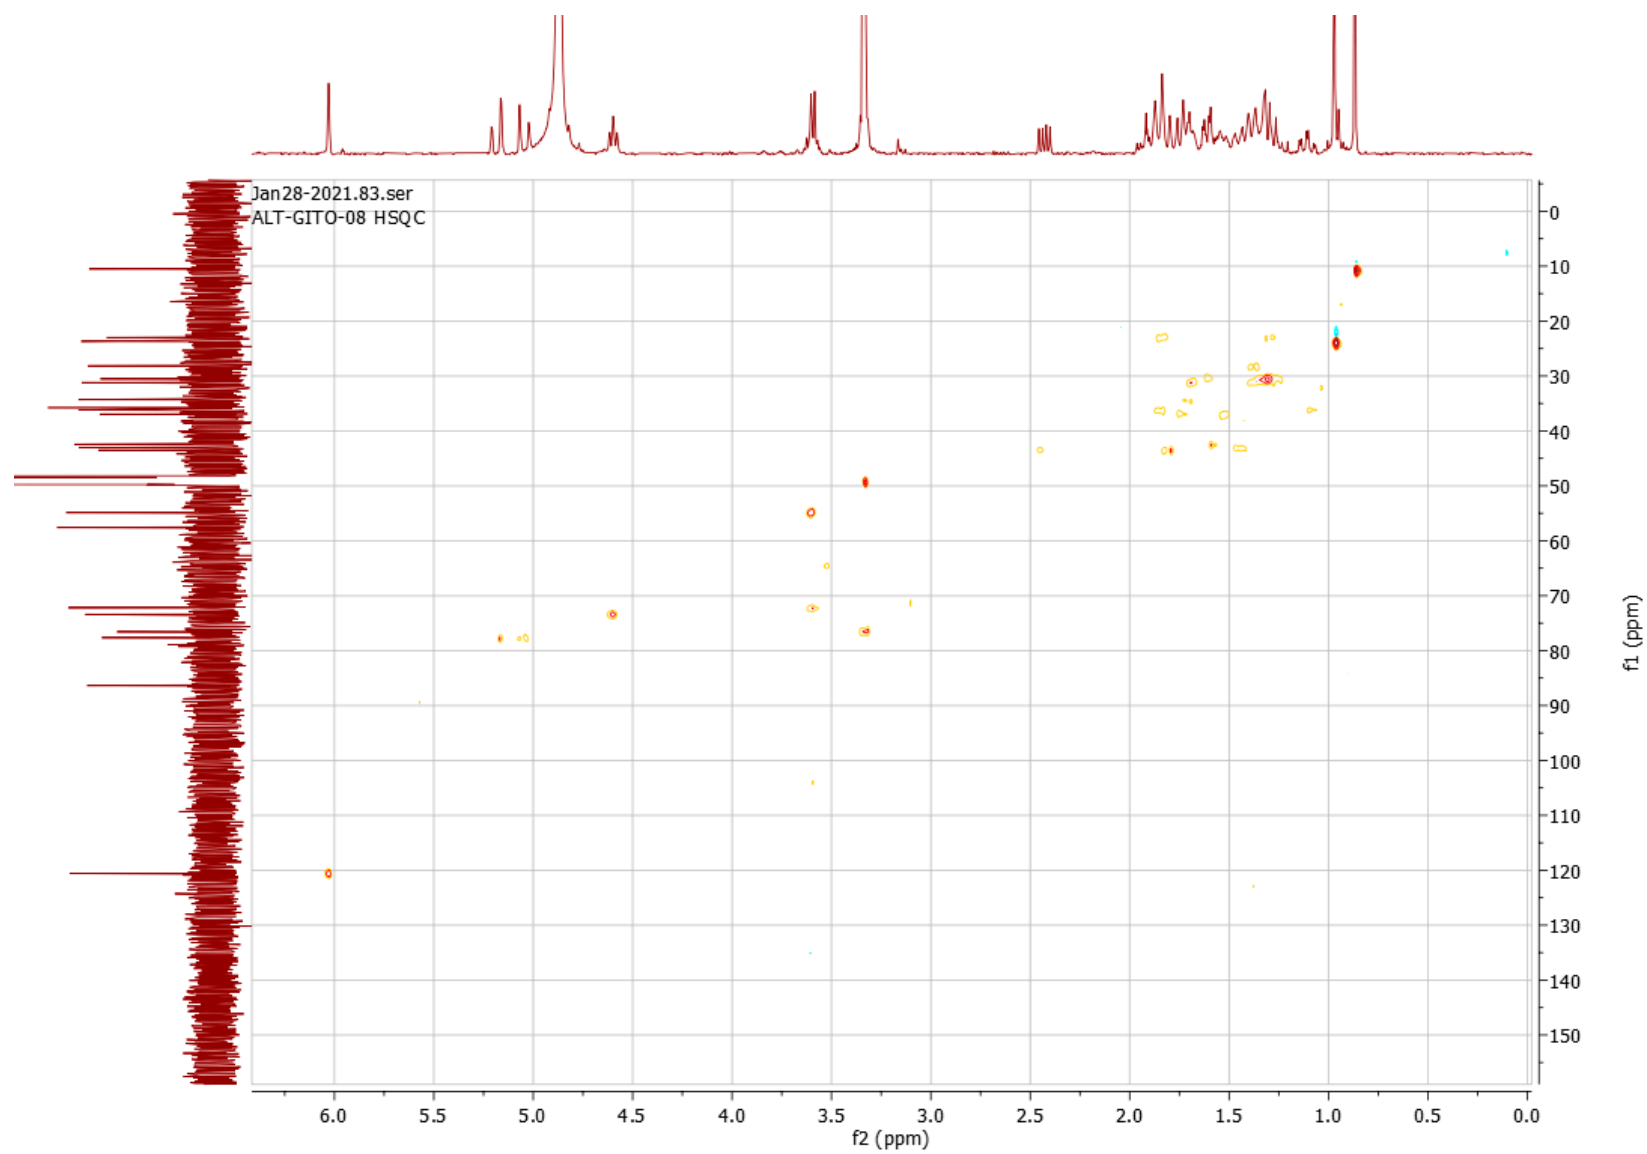

**Figure S79.** HSQC Spectrum of 3-epi-diginatigenin (**compound 8**)

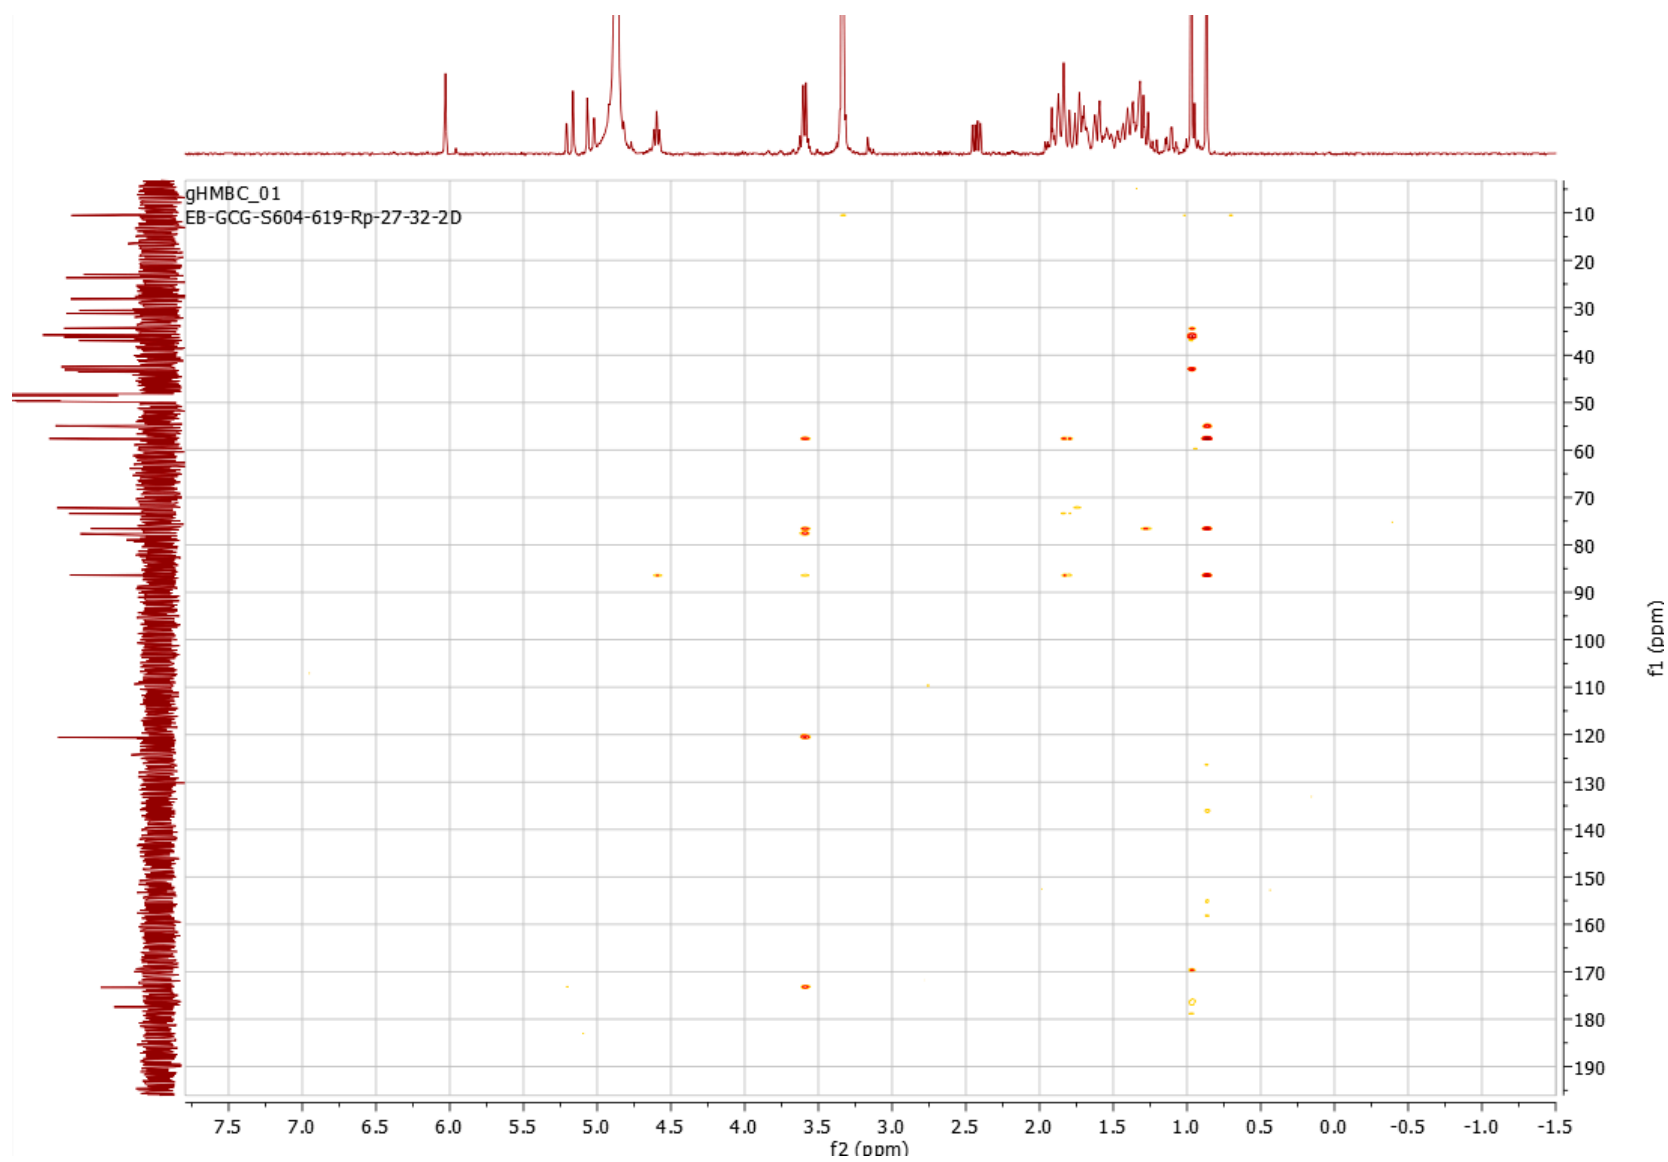

**Figure S80.** HMBC Spectrum of 3-epi-diginatigenin (**compound 8**)



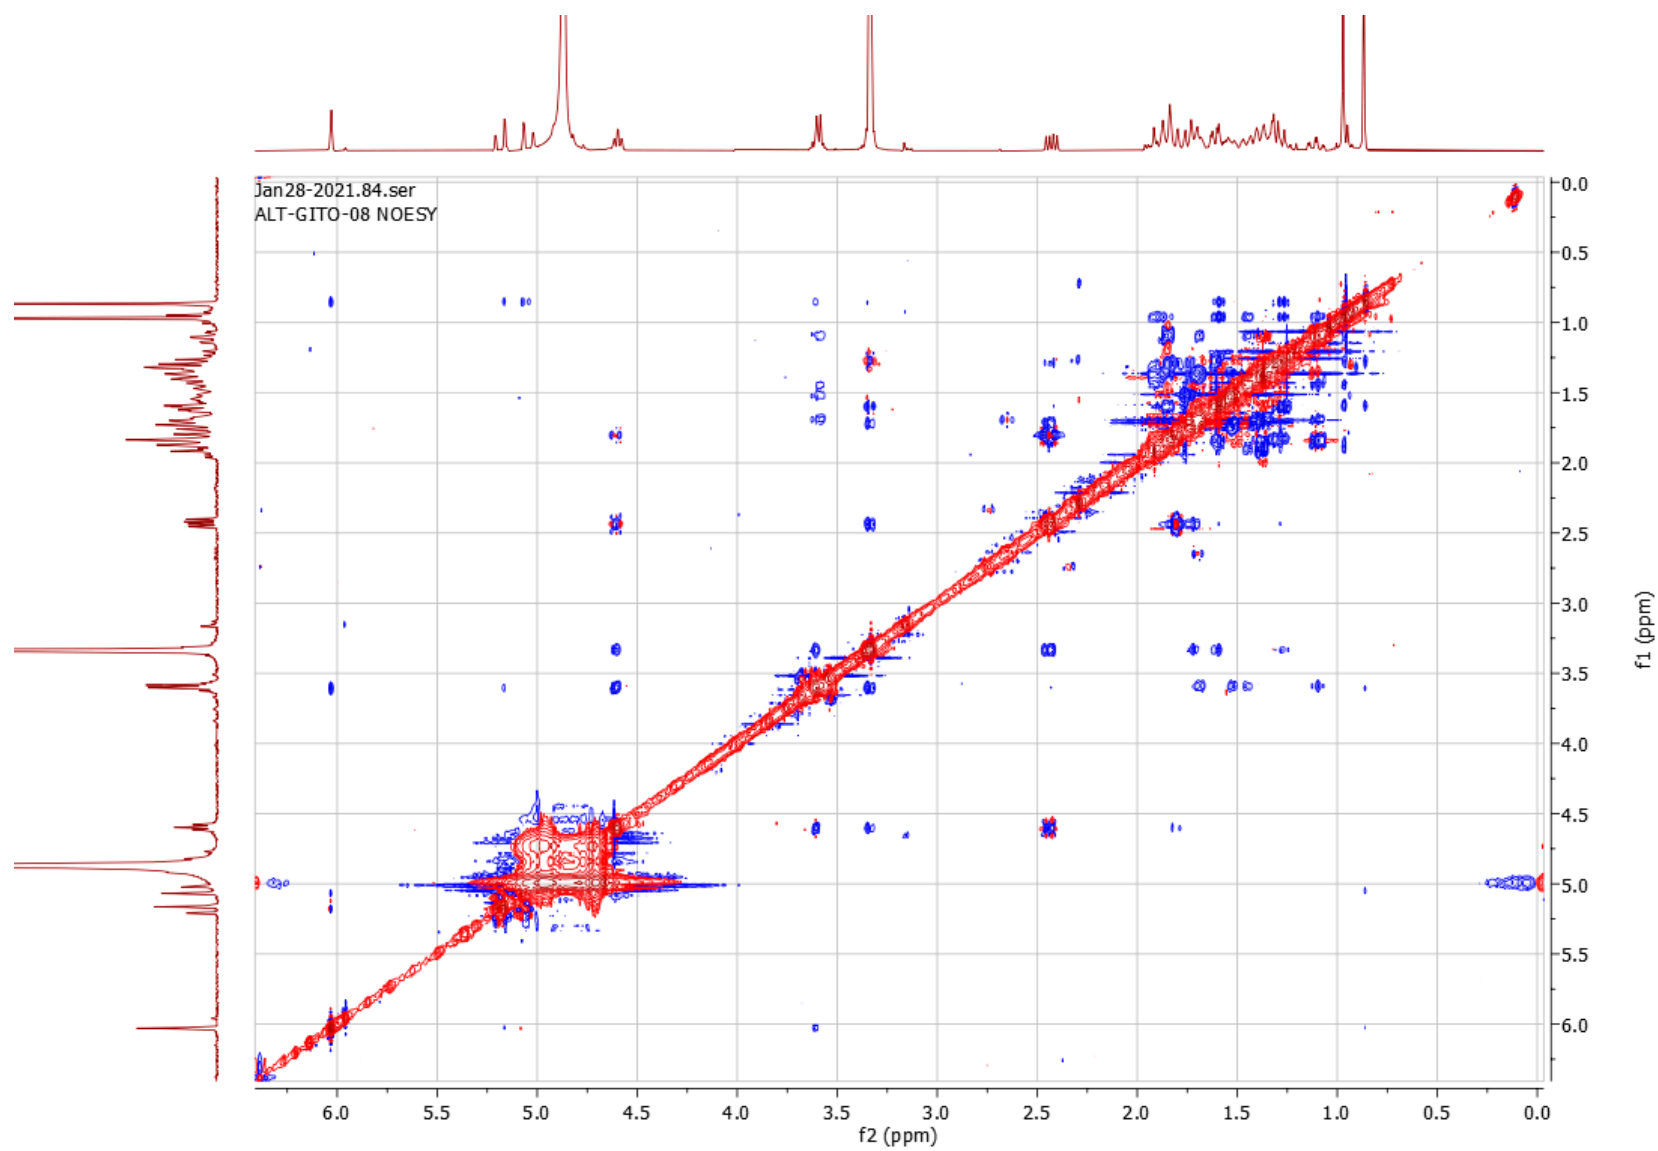

**Figure S81.** NOESY Spectrum of 3-epi-diginatigenin (**compound 8**)

**Table S 1:** HPLC Method for qualitative analysis of selected metabolites (**4**, **5** and **6**) and EtOAc extract of biotransformation broth.

|                             |                                                      |
|-----------------------------|------------------------------------------------------|
| <b>HPLC System</b>          | Agilent 1200 Series HPLC System and DAD detector     |
| <b>Stationary phase</b>     | Kinetex C-18 column (150 x 4.6mm, 5µm particle size) |
| <b>Mobile Phase</b>         | A:B (water: acetonitrile)- gradient*                 |
| <b>Flow rate</b>            | 1.0 mL/min                                           |
| <b>Enjection volume</b>     | 20 µL                                                |
| <b>Detection Wavelength</b> | 210 nm                                               |

\* After a 2 min hold at 15% B, elution was performed according to the following conditions: from 15% B to 70% B in 10 min; to 100% B in 3 min, hold to 100% B for 2 min and a re-equilibration period of 5min.

Samples with 1000 ppm concentration were prepared by using methanol. Prior to use, all samples were filtered through a 0.45 µm PTFE filter.

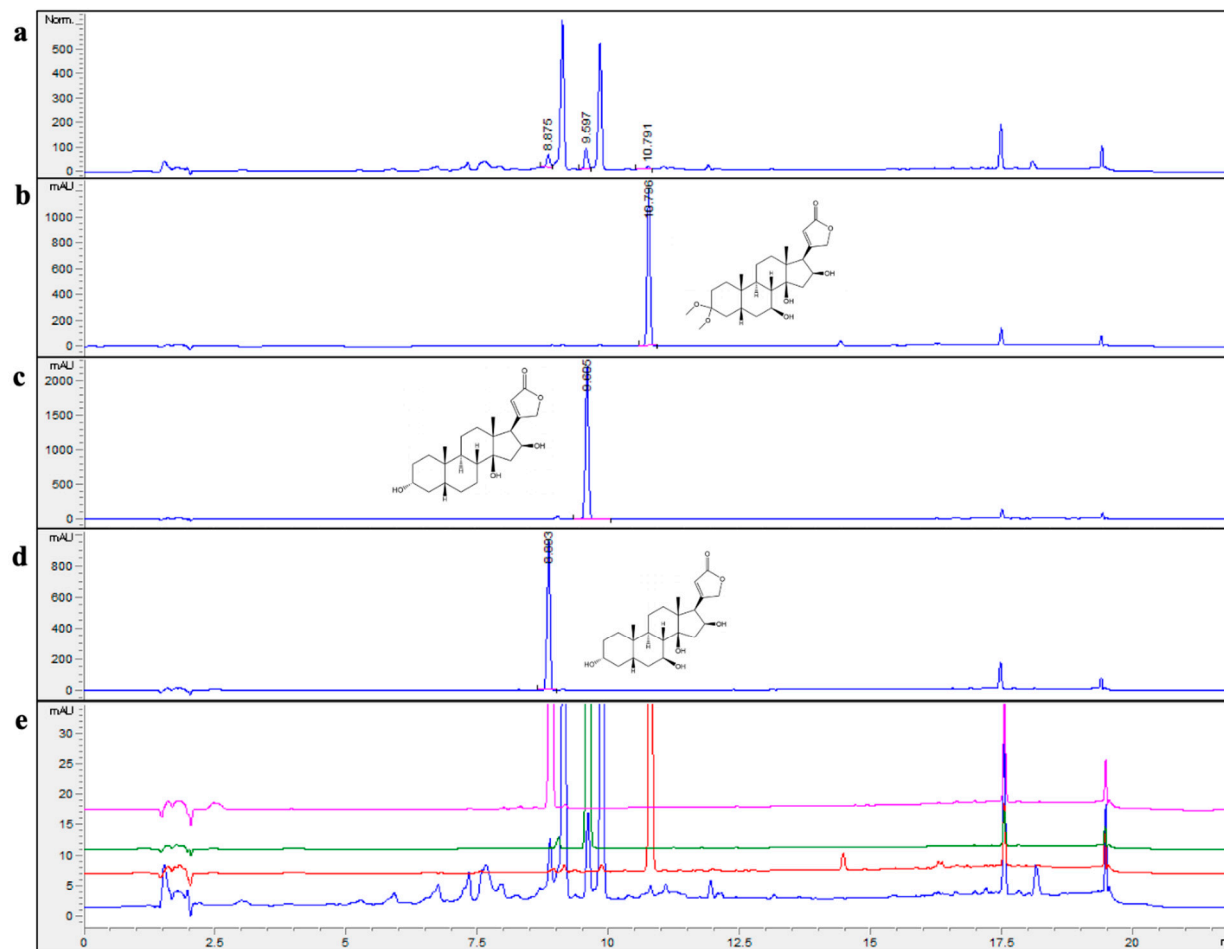

**Chromatogram S1:** HPLC chromatograms of **a)** EtOAc extract, **b)** **Compound 4** (retention time: 10.8 min), **c)** **Compound 5** (retention time: 9.6 min), **d)** **Compound 6** (retention time: 8.9 min) and **e)** comparison of the EtOAc extract (blue line) with **Compound 4** (red line), **Compound 5** (green line), **Compound 6** (pink line).

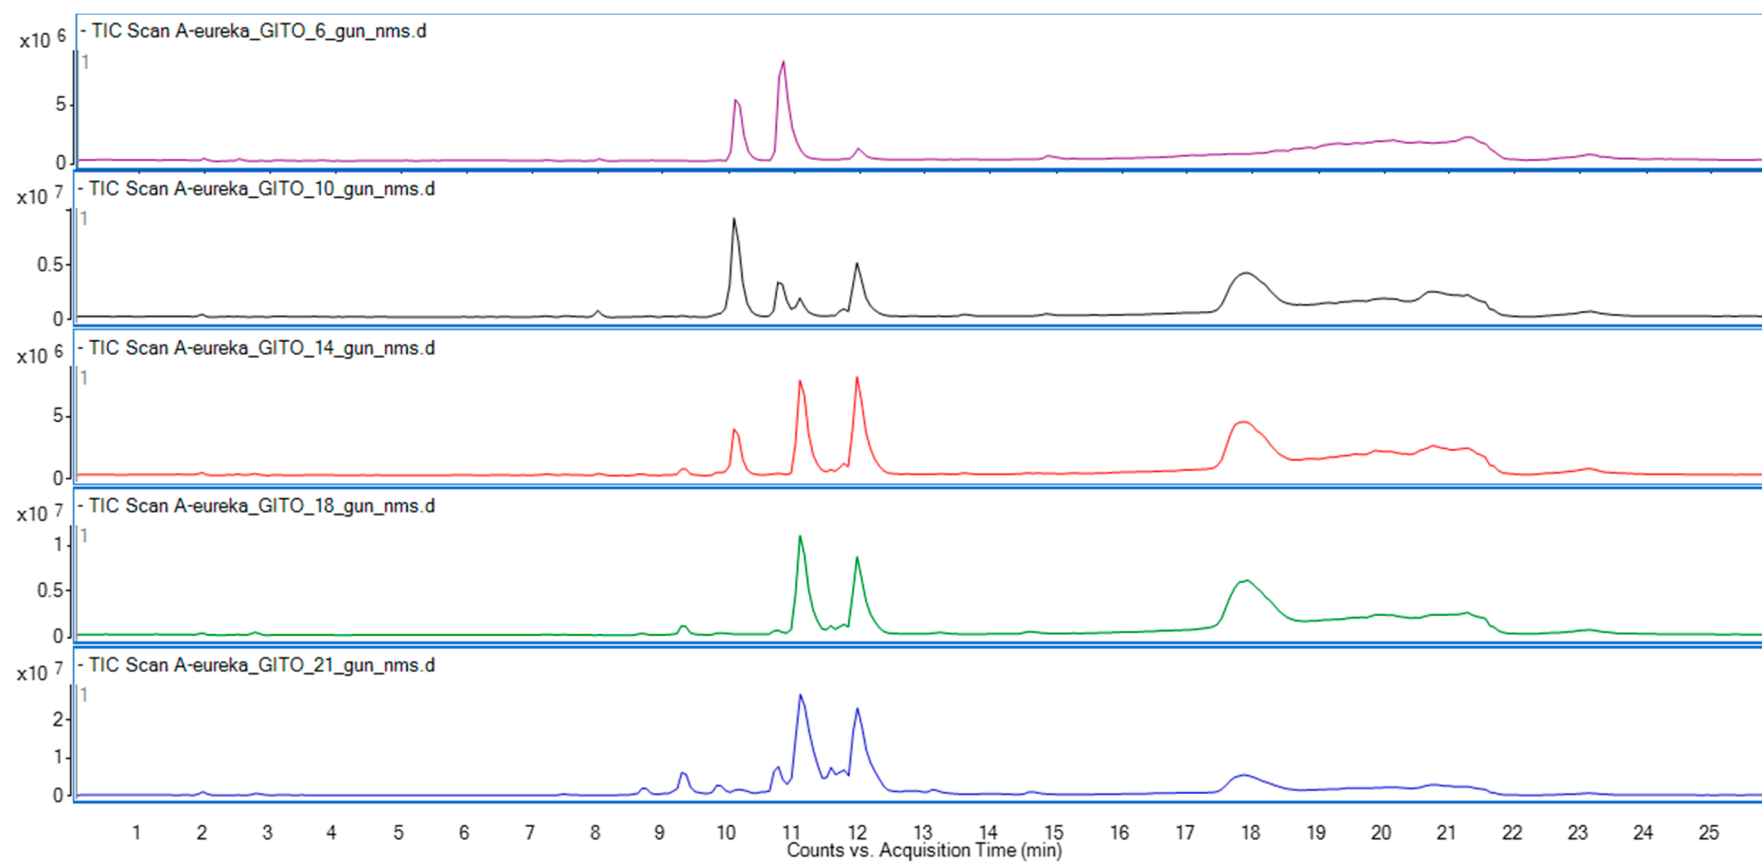

**Chromatogram S2:** LC-Q-ToF total ion chromatograms of the EtOAc extracts showing different biotransformation time points (Day 6, 10, 14, 18 and 21) (in negative mode).

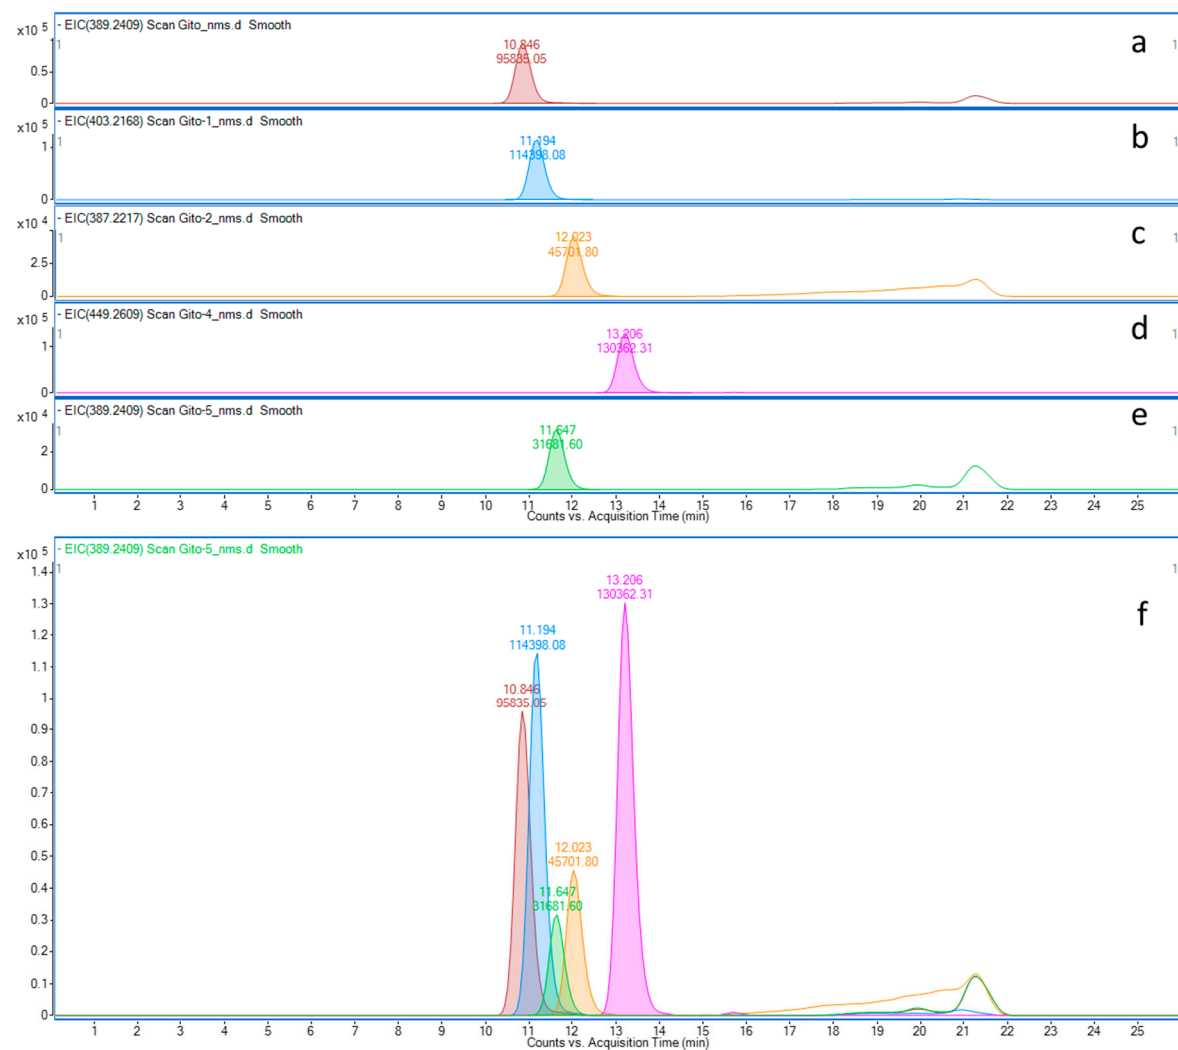

**Chromatogram S3 :** LC-Q-ToF extracted ion chromatograms of the selected compounds (Gitoxigenin, **1**, **2**, **4** and **5**) (in negative mode); **a)** Gitoxigenin (retention time: 10.85 min), **b)** **Compound 1** (retention time: 11.19 min), **c)** **Compound 2** (retention time: 12.02 min), **d)** **Compound 4** (retention time: 13.21 min), **e)** **Compound 5** (retention time: 11.65 min) and **f)** overlapped chromatograms

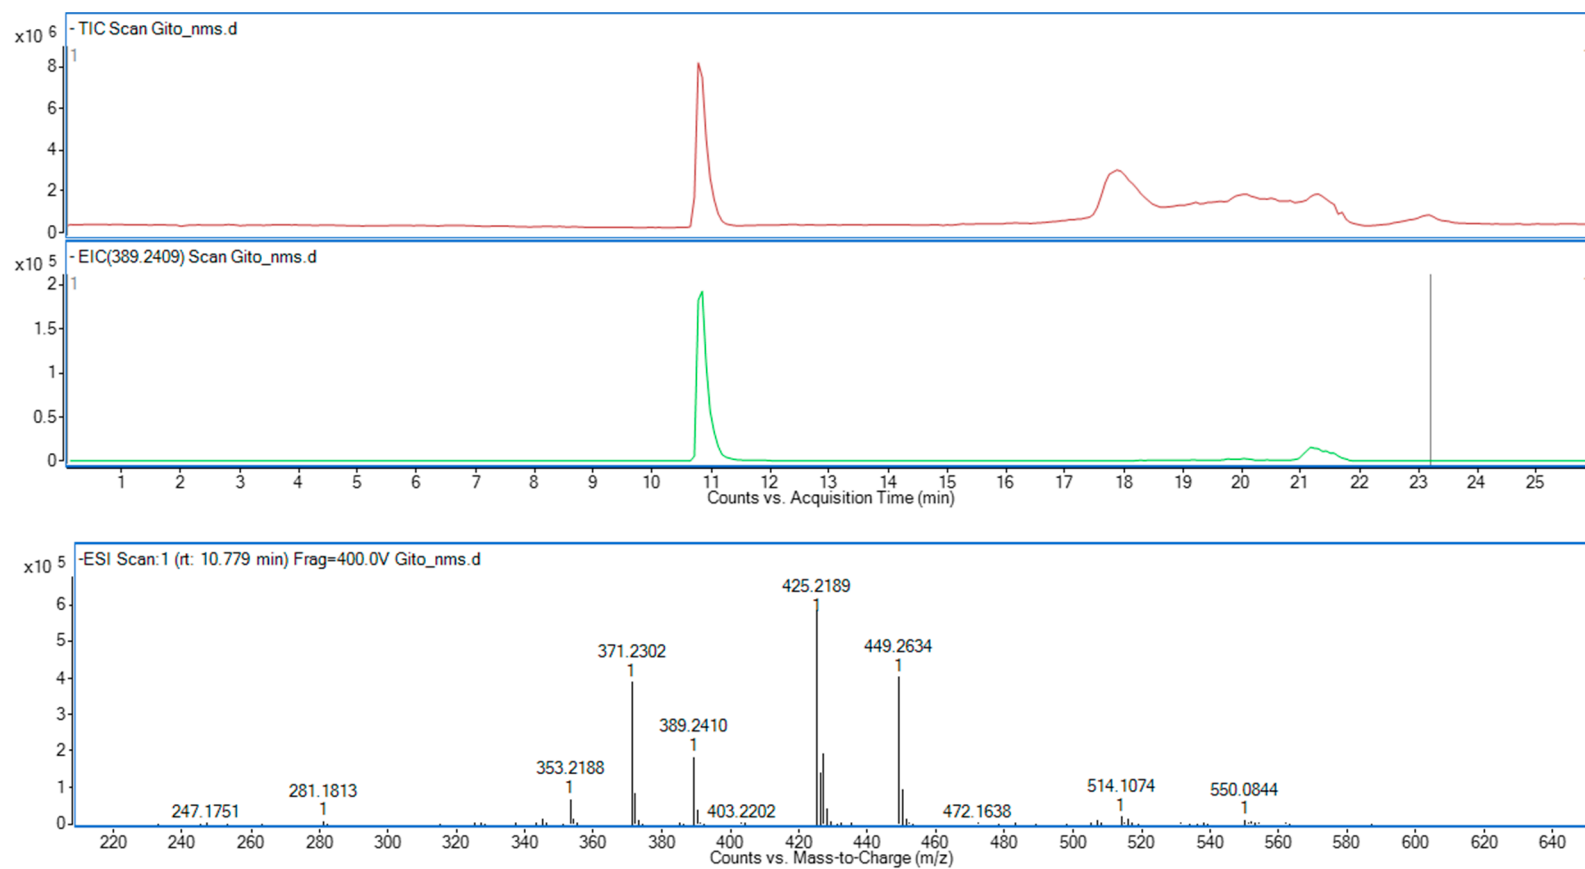

**Chromatogram S4:** LC-Q-ToF total and extracted ion chromatograms of gitoxigenin together with its mass spectrum (in negative mode).

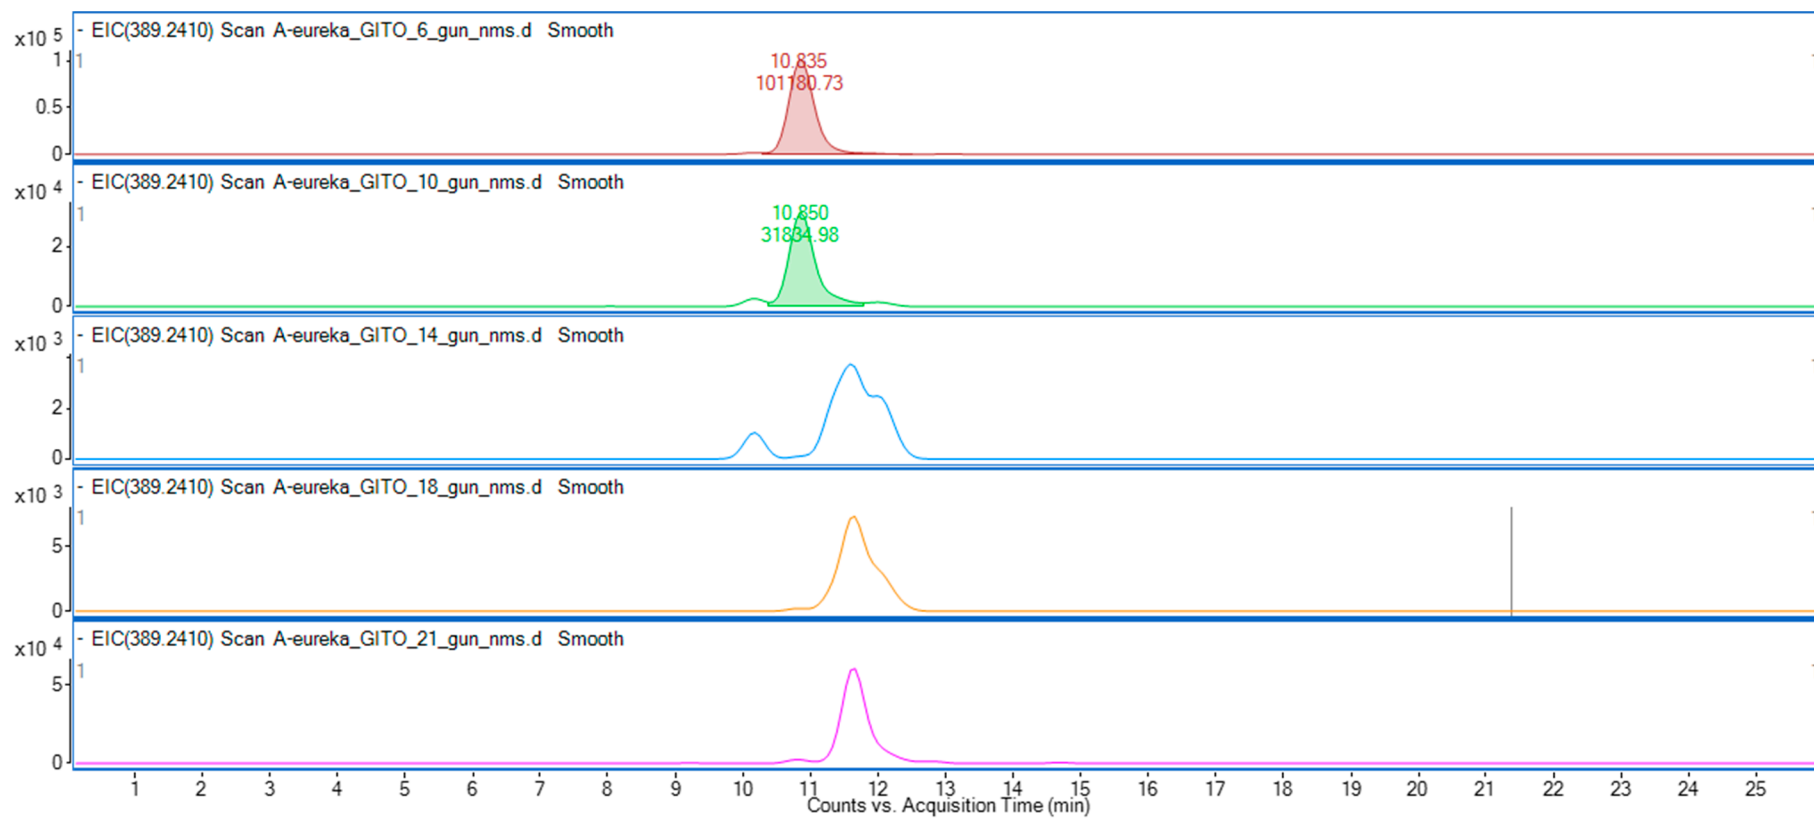

**Chromatogram S5:** LC-Q-ToF extracted ion chromatograms of gitoxigenin for different biotransformation time points (Day 6, 10, 14, 18 and 21), displaying that gitoxigenin was consumed before Day 14 (in negative mode).

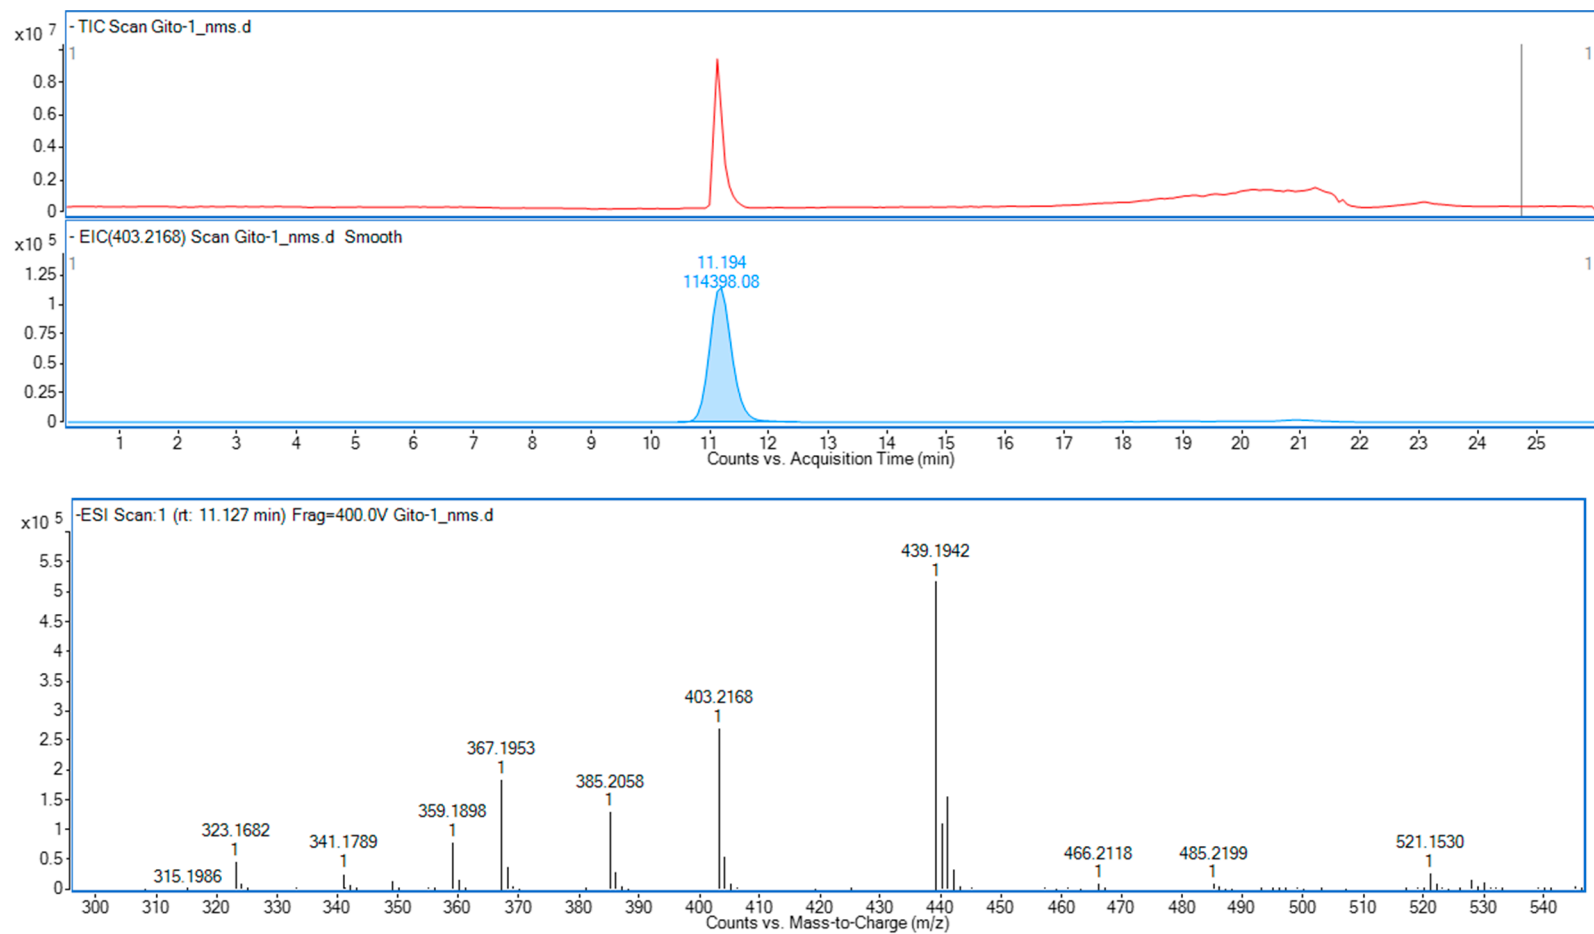

**Chromatogram S6:** LC-Q-ToF total and extracted ion chromatograms of **1** together with its mass spectrum (in negative mode).



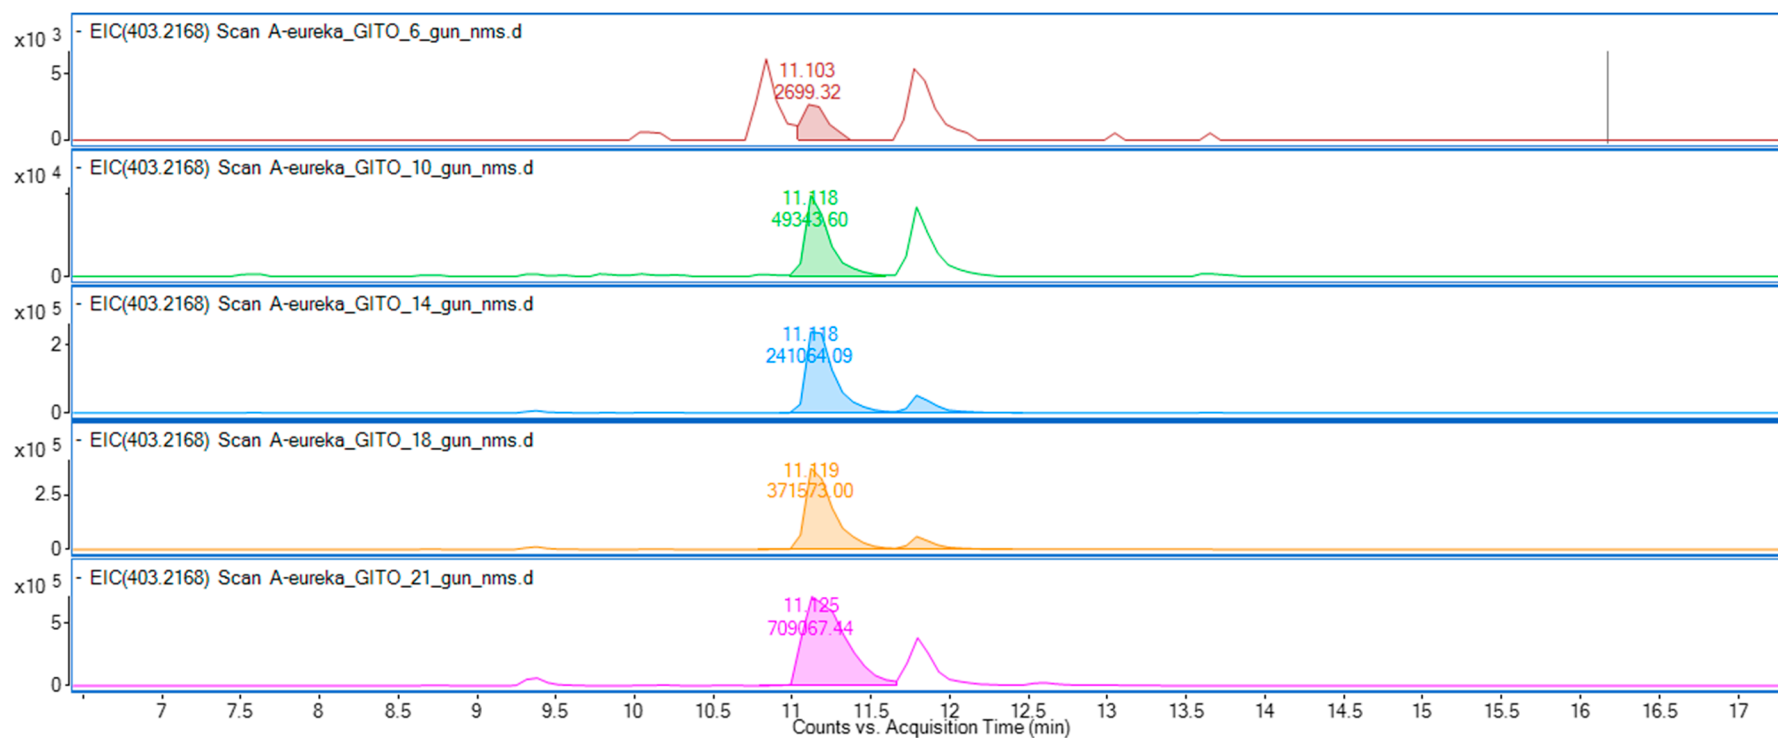

**Chromatogram S7:** LC-Q-ToF extracted ion chromatograms of **1** for different biotransformation time points (Day 6, 10, 14, 18 and 21), displaying that compound **1** was present and accumulated from Day 6 to Day 21 (in negative mode).

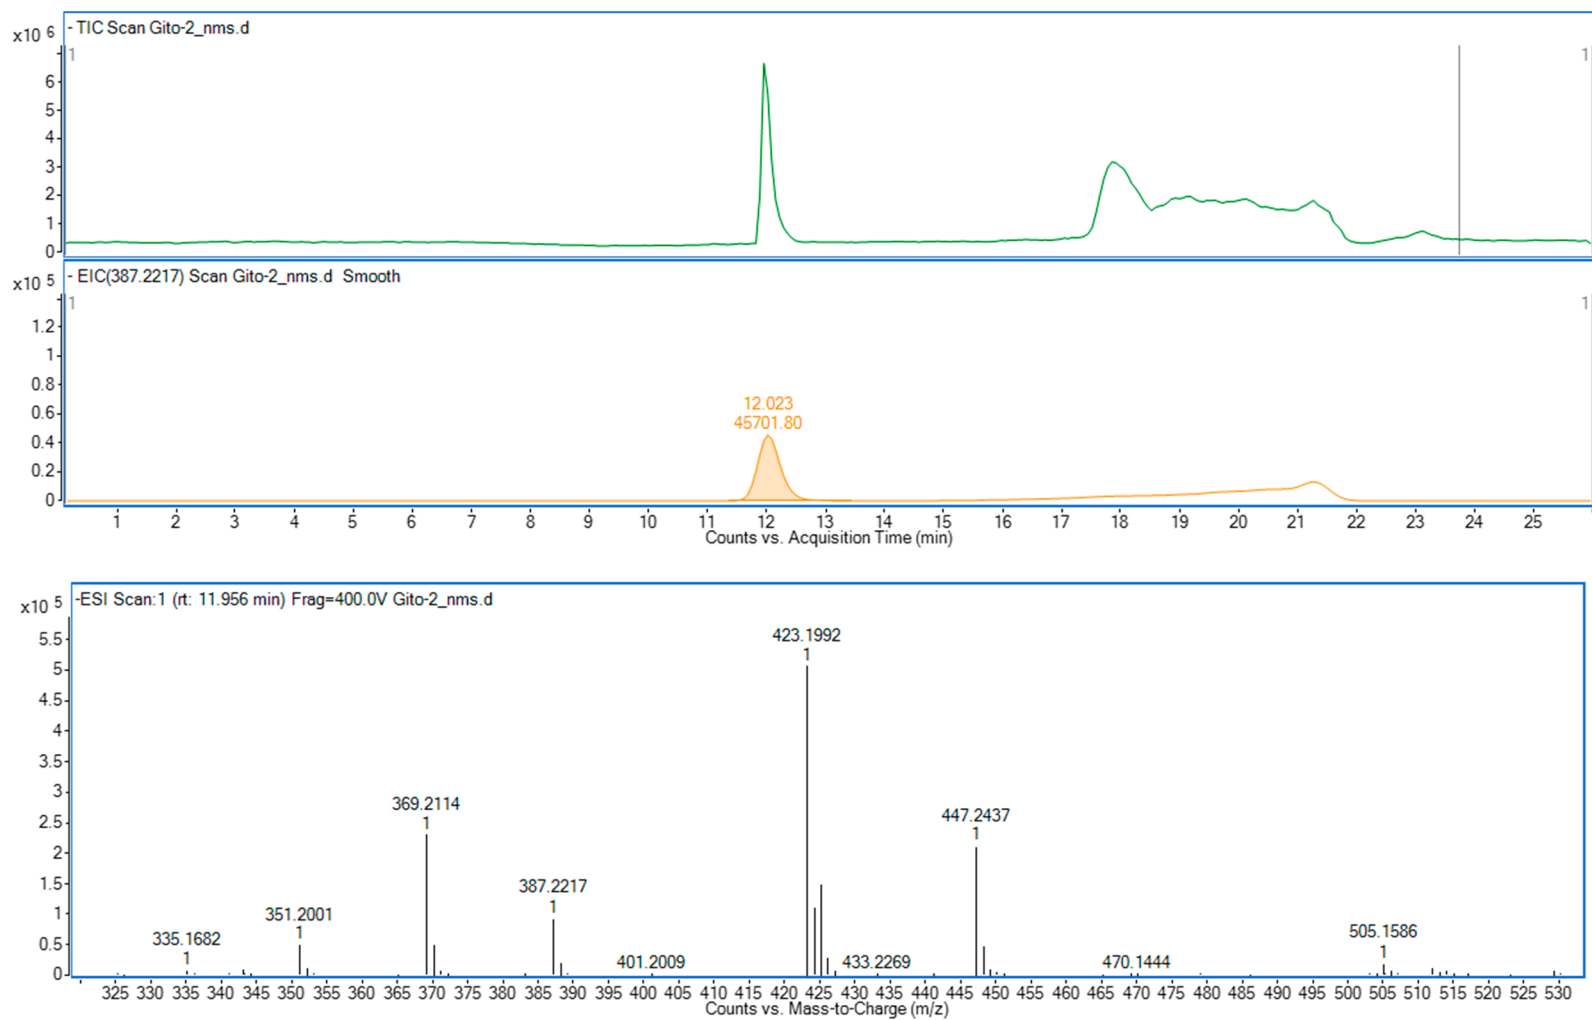

**Chromatogram S8:** LC-Q-ToF total and extracted ion chromatograms of **2** together with its mass spectrum (in negative mode).

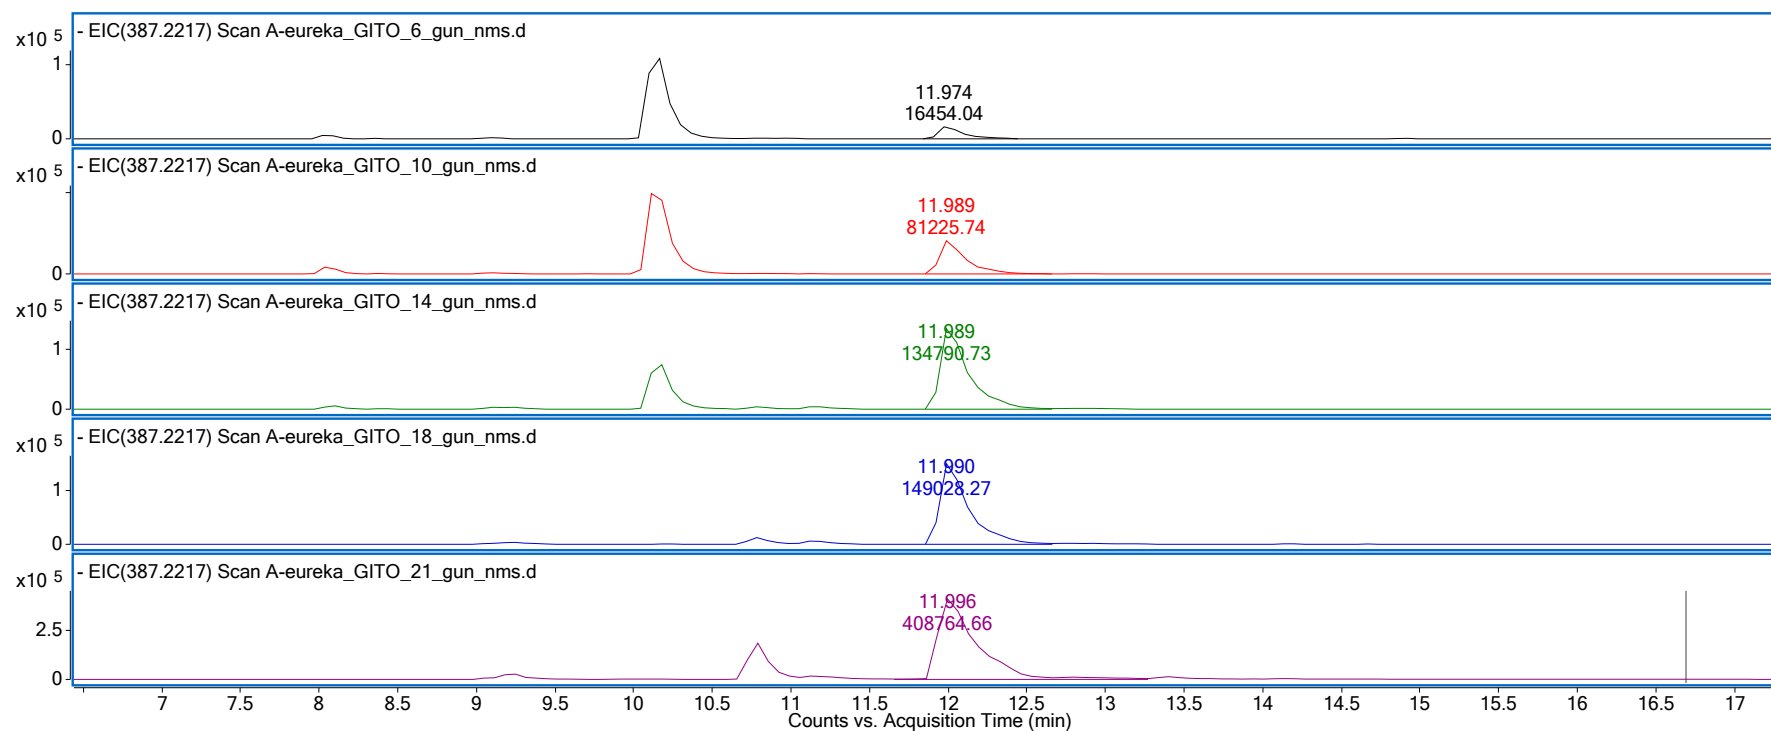

**Chromatogram S9:** LC-Q-ToF extracted ion chromatograms of **2** for different biotransformation time points (Day 6, 10, 14, 18 and 21), displaying that compound **2** was present and accumulated from Day 6 to Day 21 (in negative mode).

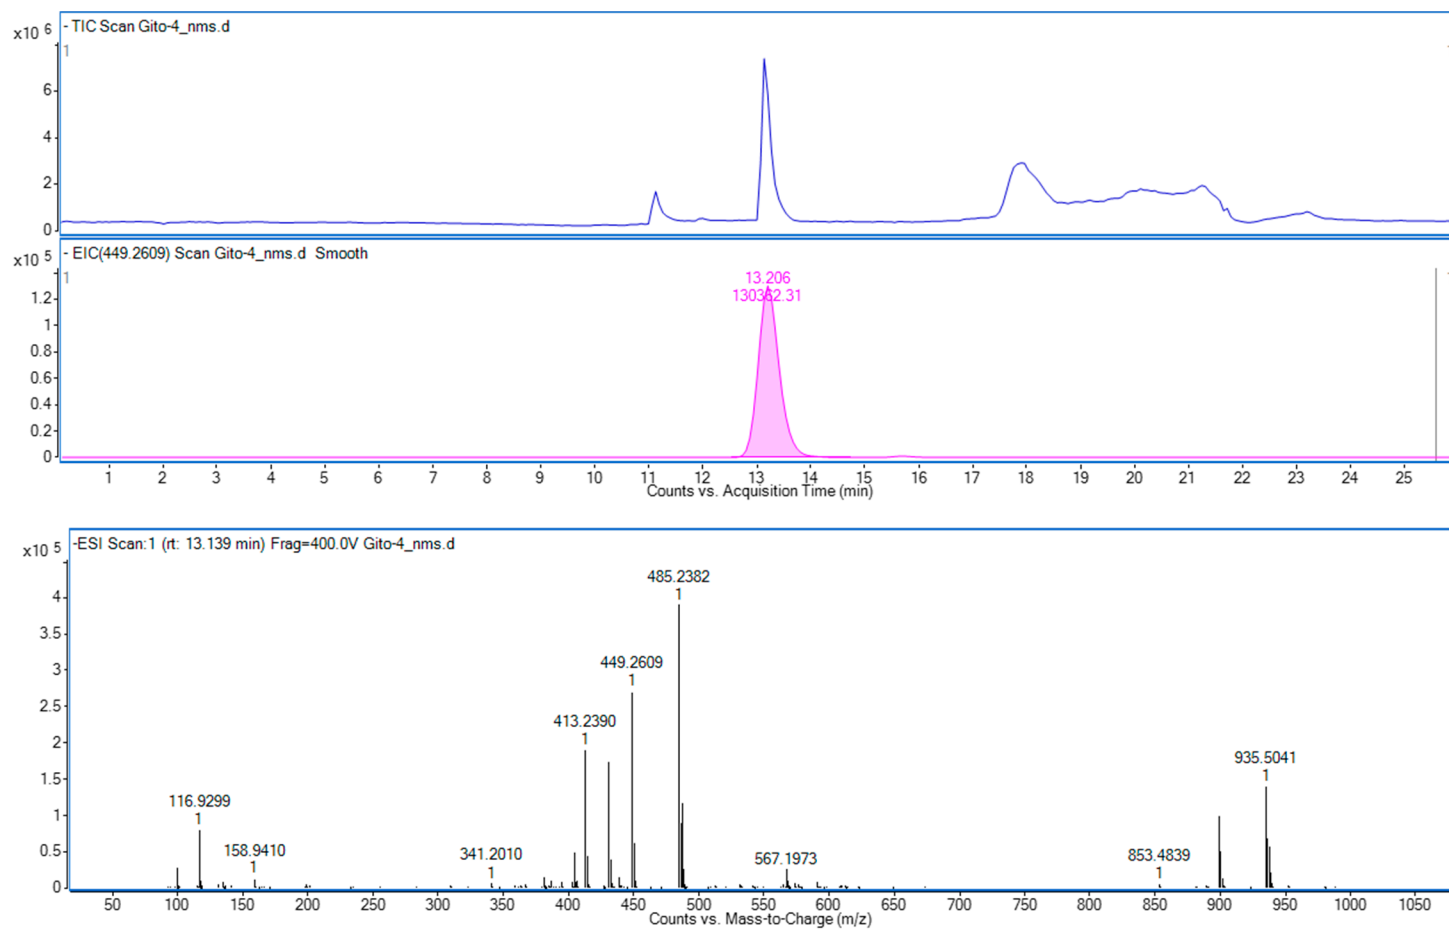

**Chromatogram S10:** LC-Q-ToF total and extracted ion chromatograms of **4** together with its mass spectrum (in negative mode).

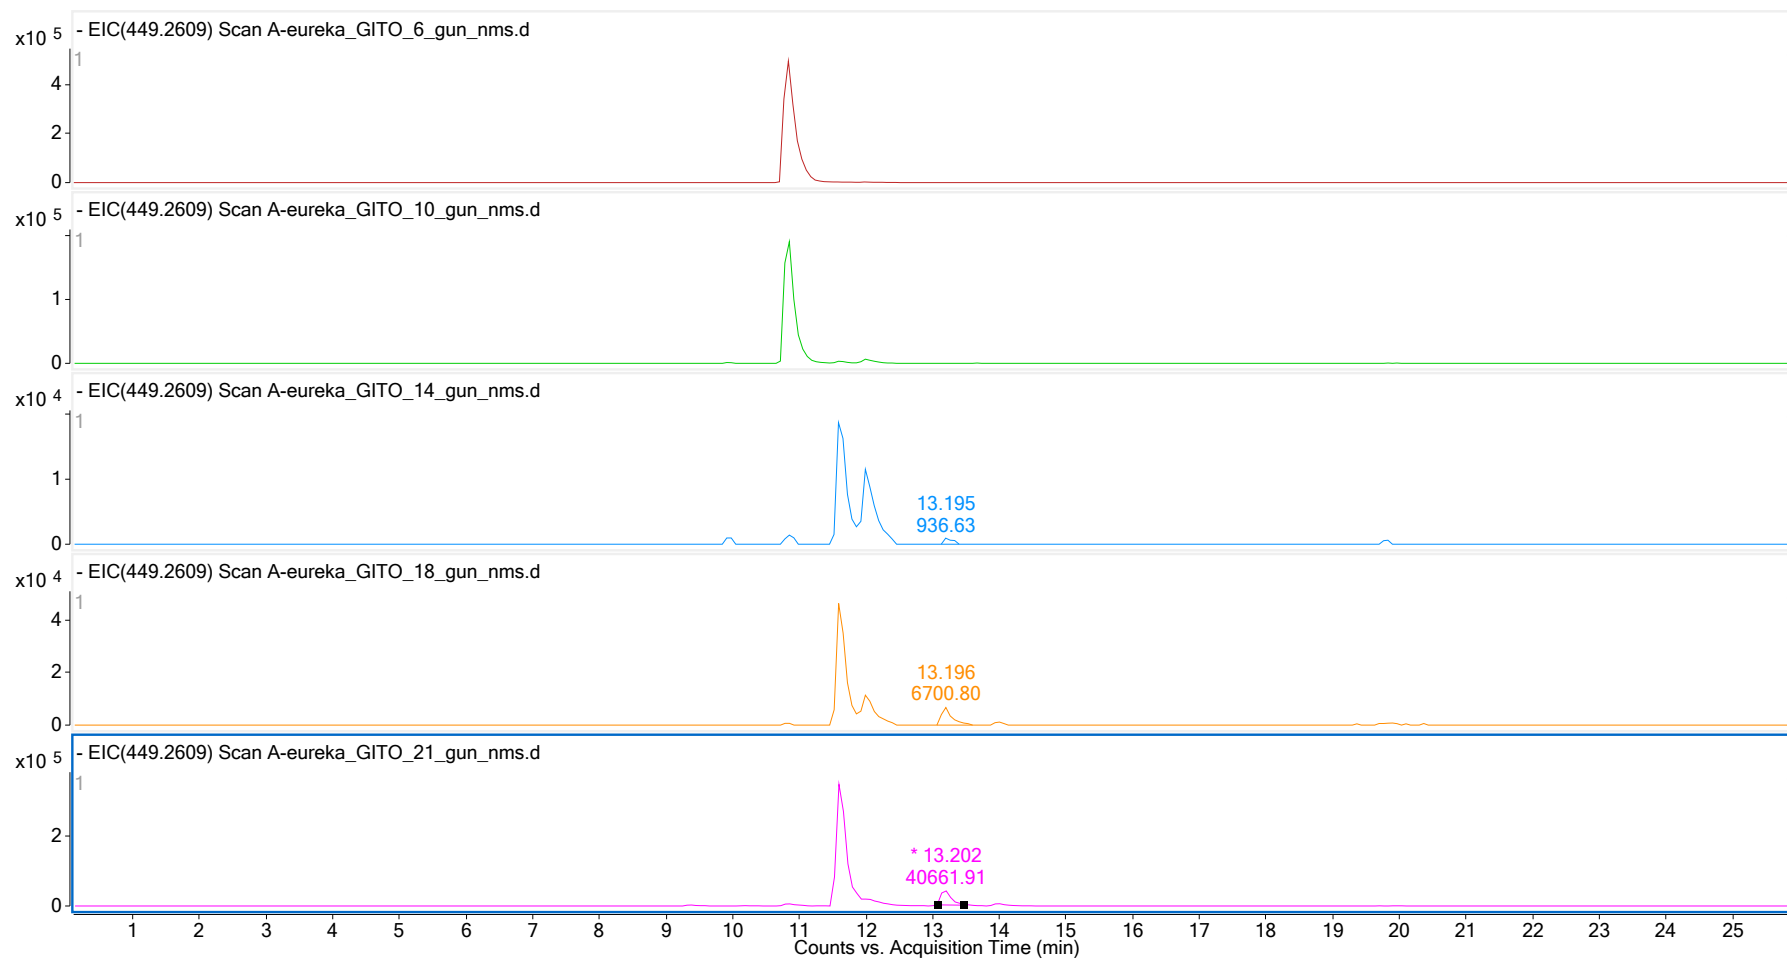

**Chromatogram S11:** LC-Q-ToF extracted ion chromatograms of **4** for different biotransformation time points (Day 6, 10, 14, 18 and 21), displaying that compound **4** was produced and accumulated in last three biotransformation time points (Day 14, 18 and 21) (in negative mode).

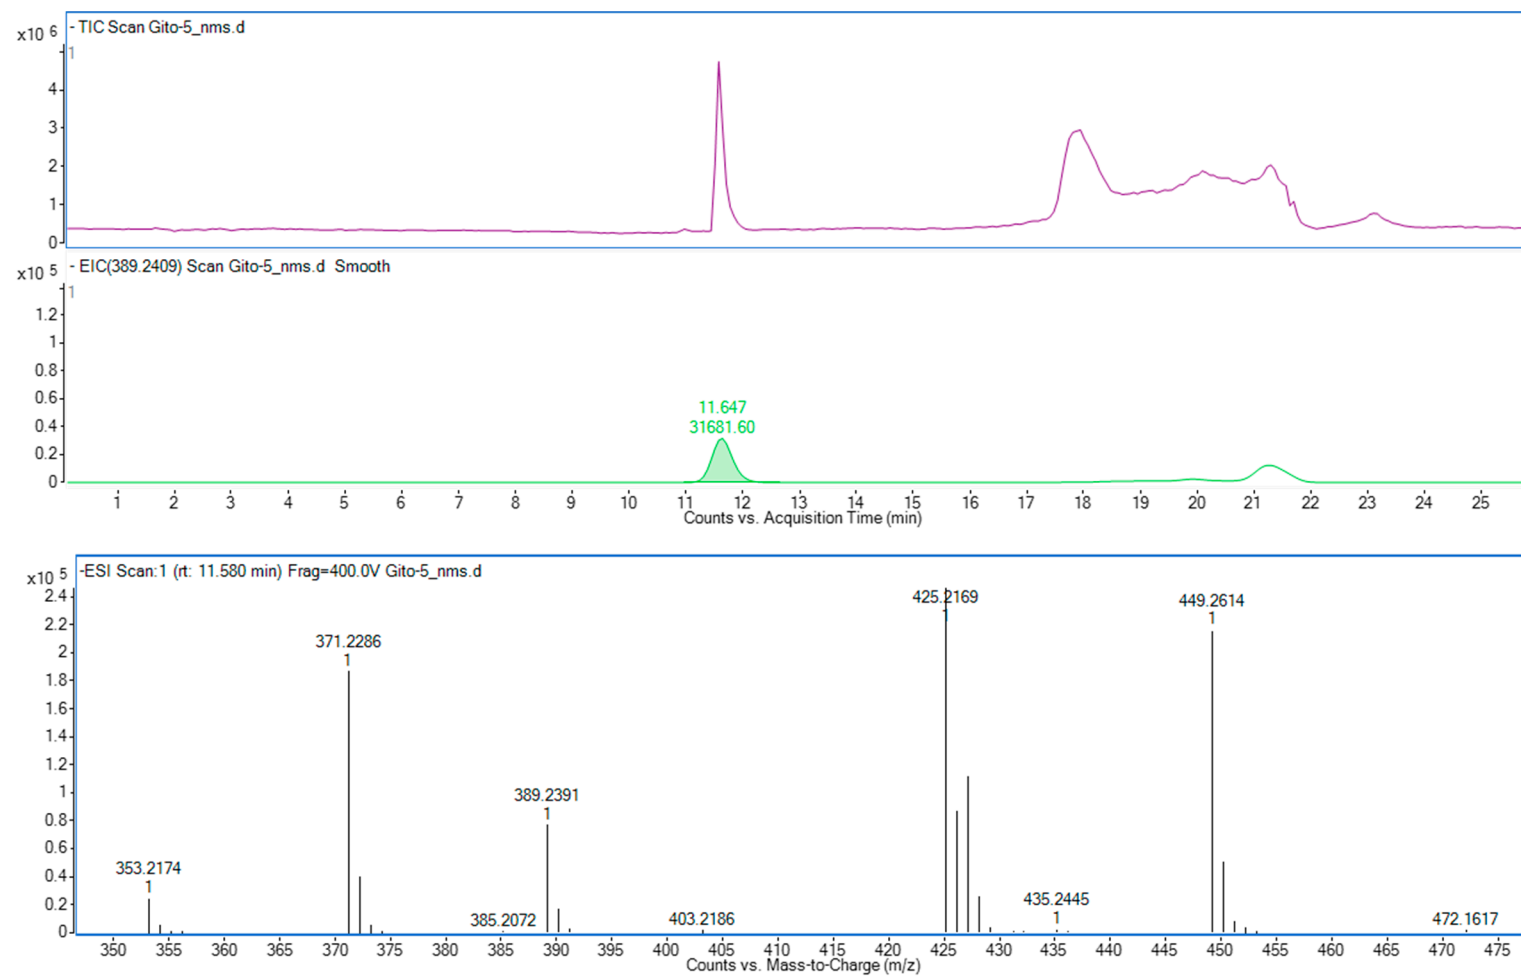

**Chromatogram S12:** LC-Q-ToF total and extracted ion chromatograms of **5** together with its mass spectrum (in negative mode).

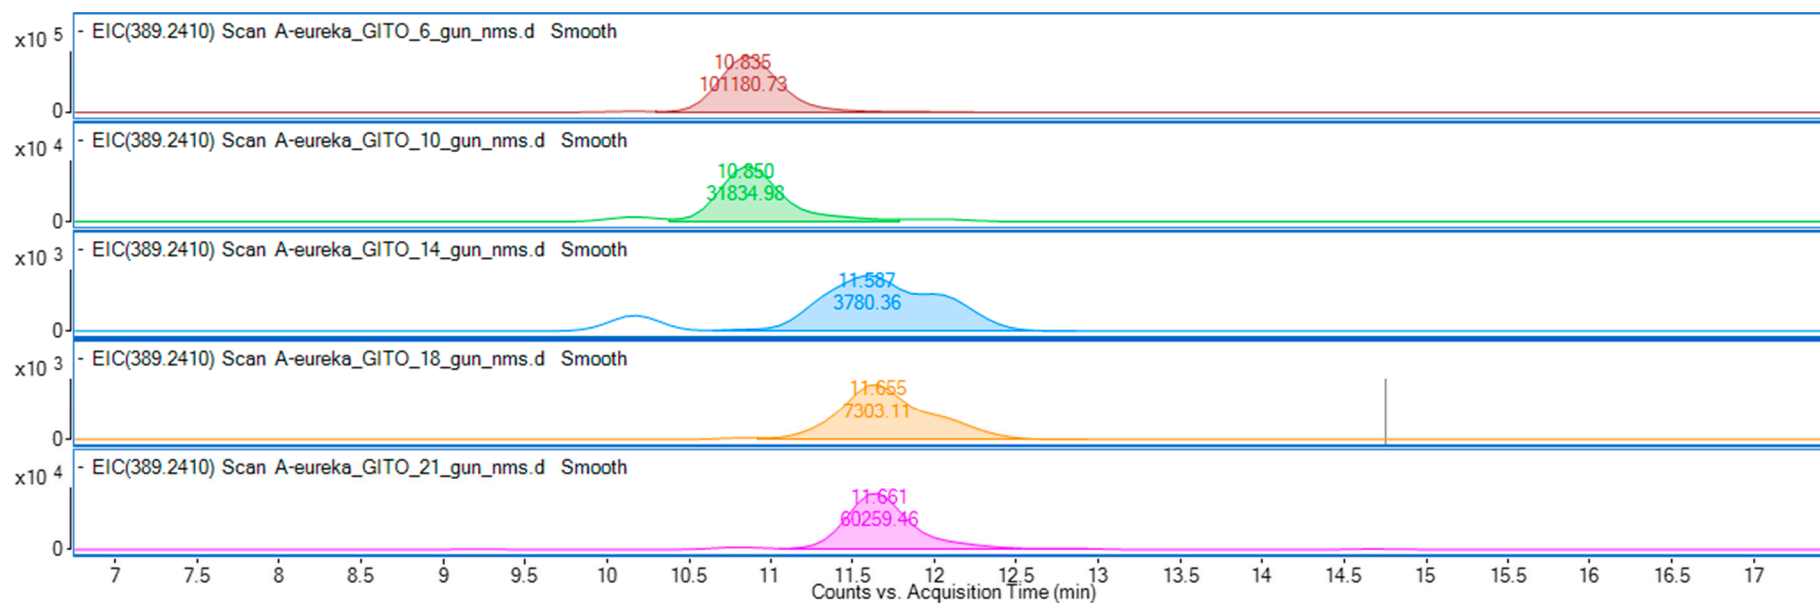

**Chromatogram S13:** LC-Q-ToF extracted ion chromatograms of **5** for different biotransformation time points (Day 6, 10, 14, 18 and 21), displaying that compound **5** was produced in the last three biotransformation time points (Day 14, 18 and 21) (in negative mode).

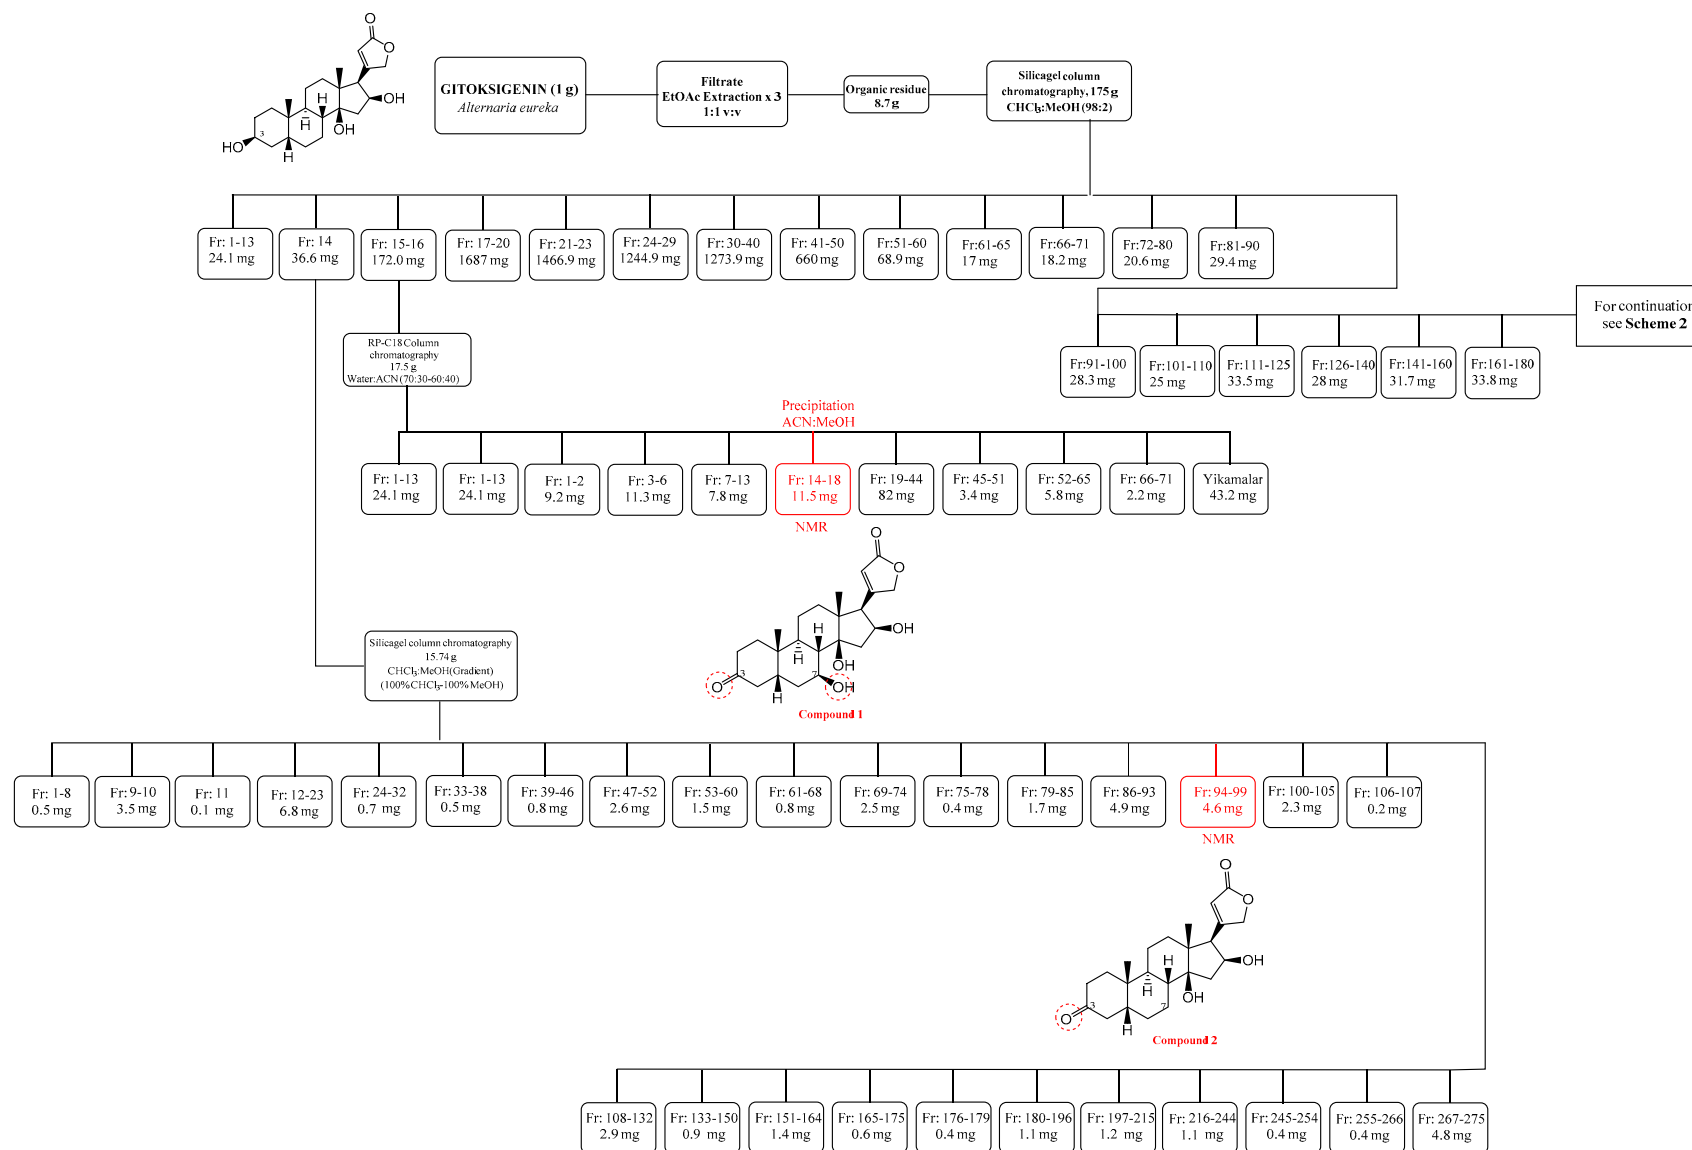

**Scheme S1:** Isolation pattern for biotransformation products of gitoxigenin



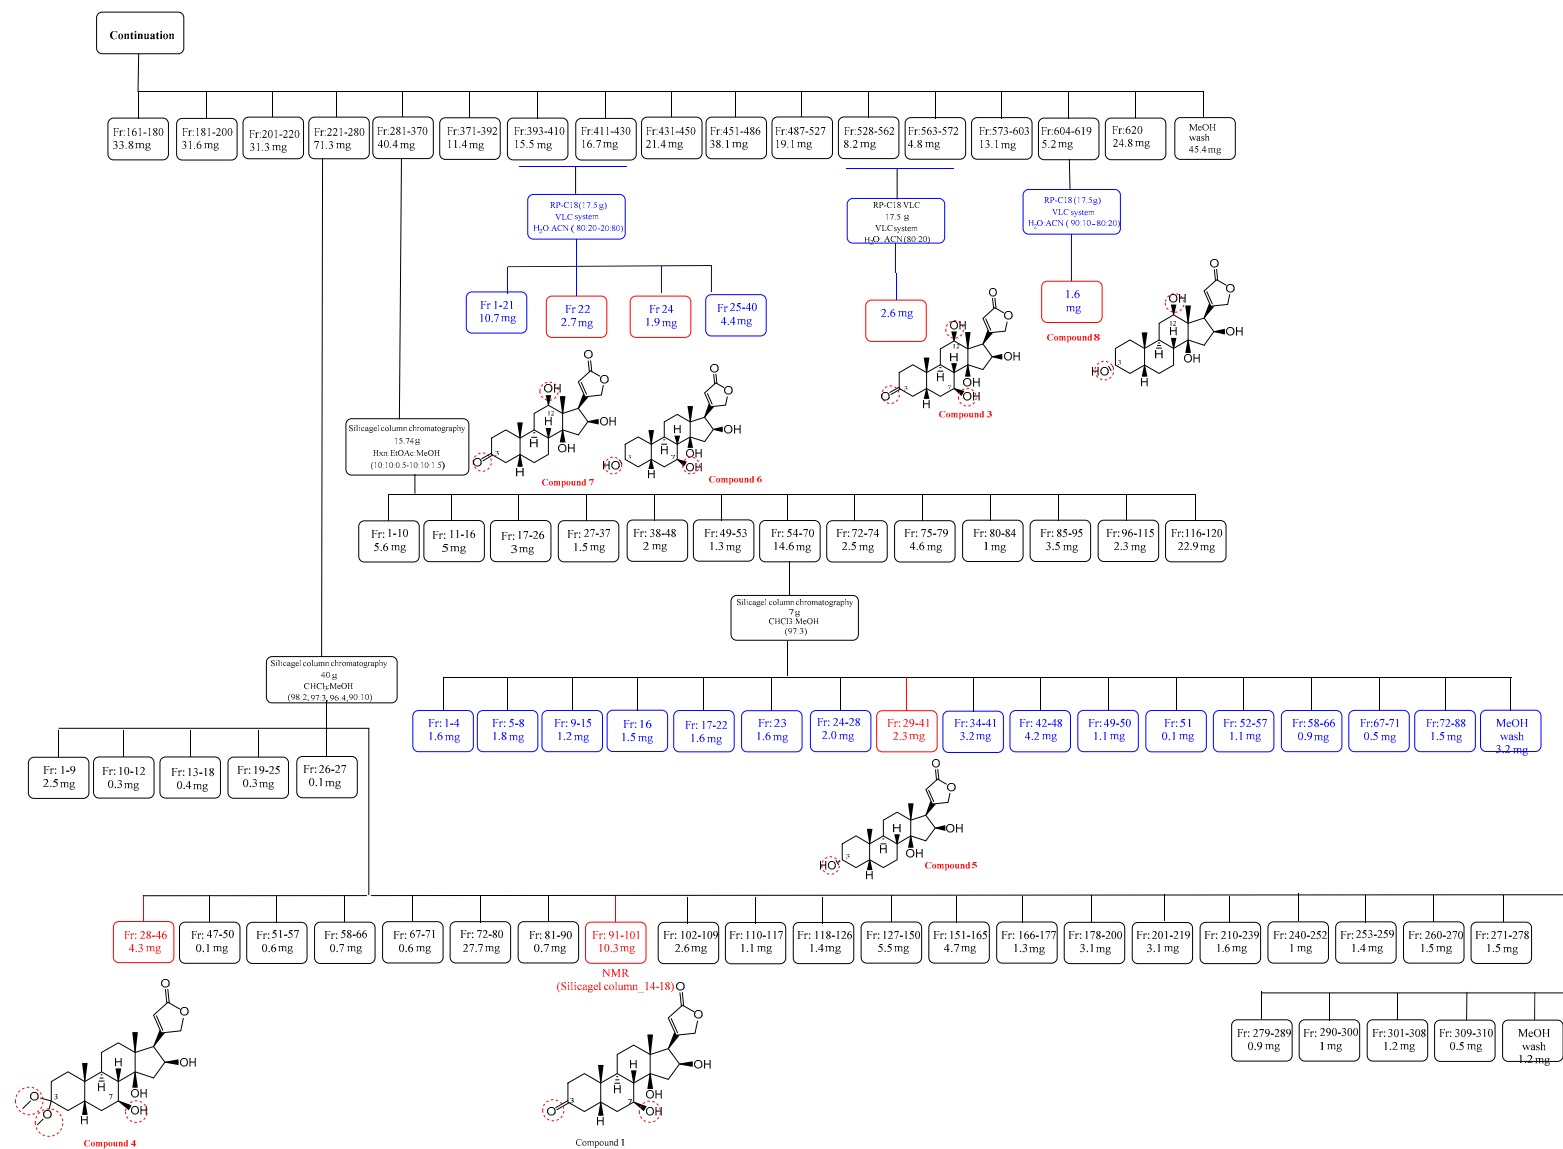

**Scheme S2:** Isolation pattern for biotransformation products of gitoxigenin

**Table S2:** LC-MS method for qualitative analysis of the selected metabolites (**1, 2, 4, 5**), gitoxigenin, and the EtOAc extracts of biotransformation broth.

|                   |                                                                  |
|-------------------|------------------------------------------------------------------|
| Column            | Agilent Zorbax Extend column 4.6 mm x 150 mm x 3.5 $\mu$ m       |
| Column Temp.      | 25 °C                                                            |
| Injection volume  | 1 $\mu$ l                                                        |
| Run Time          | 26 min.                                                          |
| Mobile Phase A    | 5mM Ammonium Acetate in Water                                    |
| Mobile Phase B    | Acetonitrile                                                     |
| Flow rate         | 0.6 ml/min                                                       |
| Gradient          | 0 min- 15 % B                                                    |
|                   | 2 min- 15 % B                                                    |
|                   | 12 min- 70 % B                                                   |
|                   | 15 min-90 % B                                                    |
|                   | 18 min- 90 % B                                                   |
|                   | 18.1 min- 15 % B                                                 |
|                   | 26 min- 15 % B                                                   |
|                   |                                                                  |
|                   |                                                                  |
|                   |                                                                  |
| Ionisation mode   | Negative electrospray ionisation mode with jet stream technology |
| Drying gas temp   | 200 °C                                                           |
| Drying gas flow   | 14 L/min                                                         |
| Nebuliser         | 35 psi                                                           |
| Sheath gas temp   | 400 °C                                                           |
| Sheat gas flow    | 11 L/min                                                         |
| Capillary Voltage | 1500 V                                                           |
| Nozzle Voltage    | 1000 V                                                           |
| Mass range        | 40-1700 amu                                                      |
| Reference ions    | 980.0147, 1033.9881 for negative run                             |
